# Supplementary material for: Loss of ESRP2 Activates TAK1‐MAPK Signaling through the Fetal RNA‐Splicing Program to Promote Hepatocellular Carcinoma Progression
Source: PubMed Central journal article supplement (PMC10767434; doi:10.1002/advs.202305653), 2023-11-20
Supplement: ADVS-11-2305653-s001.pdf [file ADVS-11-2305653-s001.pdf]

## Supporting Information

for *Adv. Sci.*, DOI 10.1002/adv.202305653

Loss of ESRP2 Activates TAK1-MAPK Signaling through the Fetal RNA-Splicing Program to Promote Hepatocellular Carcinoma Progression

*Qian Yan, Xiaona Fang, Xiaoxia Liu, Sai Guo, Siqi Chen, Min Luo, Ping Lan\* and Xin-Yuan Guan\**

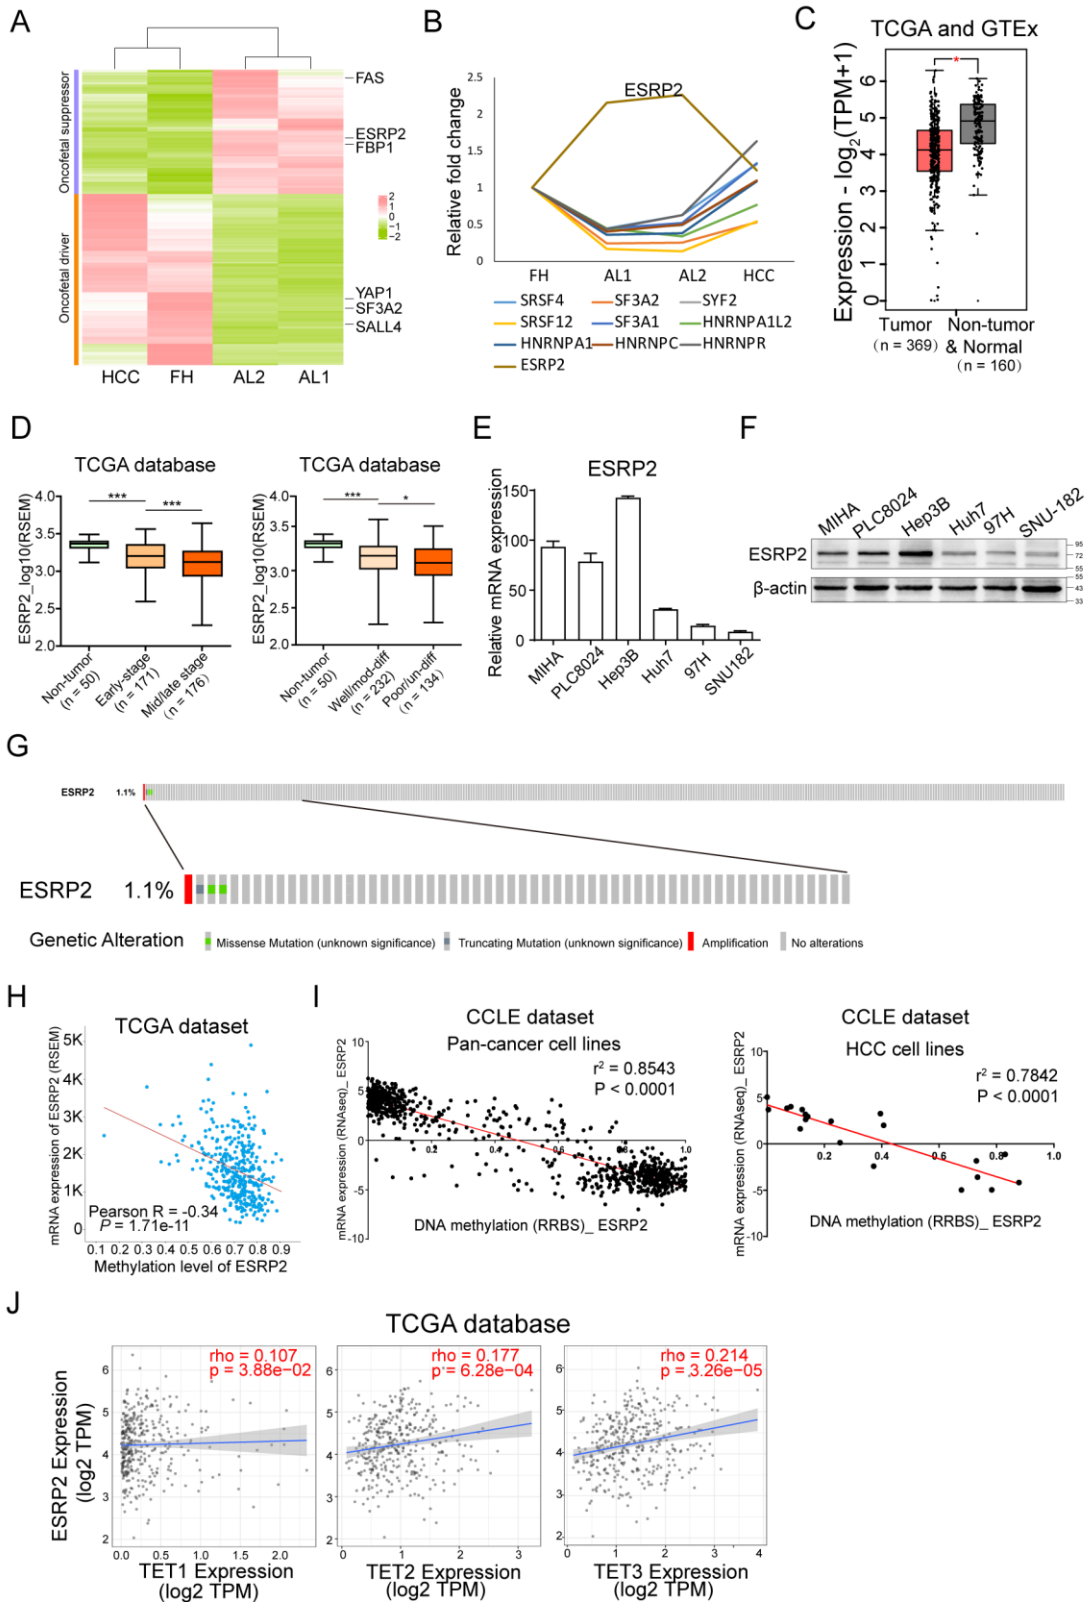

**Supplementary Figure 1. ESRP2 is downregulated in HCC and the down-regulation is correlated**

**with promoter hypermethylation.**

**(A)** Hierarchical clustering analysis was used to illustrate the unique expression patterns of oncofetal drivers or suppressors among fetal hepatocytes (FH), adult liver (AL), and HCC samples. Representative molecules were denoted on the right of the heatmap. **(B)** The expression patterns of various splicing factors across FH, AL and HCC samples. The relative fold change was determined based on gene expression at the FH stage. **(C, D)** The expression of ESRP2 was analyzed in TCGA cohorts divided by tumor and non-tumor **(C)**, different clinicopathological stage or differentiation status **(D)**. **(E, F)** Expression of ESRP2 in HCC cell lines or immortalized liver cell line was detected by qRT-PCR **(E)** or western blot analysis **(F)**. **(G)** The DNA alterations of ESRP2 in HCCs from TCGA dataset were shown. The data were downloaded from cBioportal. **(H)** The association between ESRP2 expression and methylation level in TCGA-HCC cohort. Pearson coefficient R was used to denote the correlation. **(I)** Association between mRNA expression and DNA methylation of ESRP2 in pan-cancer cell lines (left) and HCC cell lines (right) from CCLE dataset (<https://sites.broadinstitute.org/ccle/>). Pearson coefficient R was used to denote the correlation. **(J)** The correlation between ESRP2 expression and the expression of TET1, TET2, and TET3 in the TCGA-CRC database. Pearson coefficient R was used to quantify the correlation.

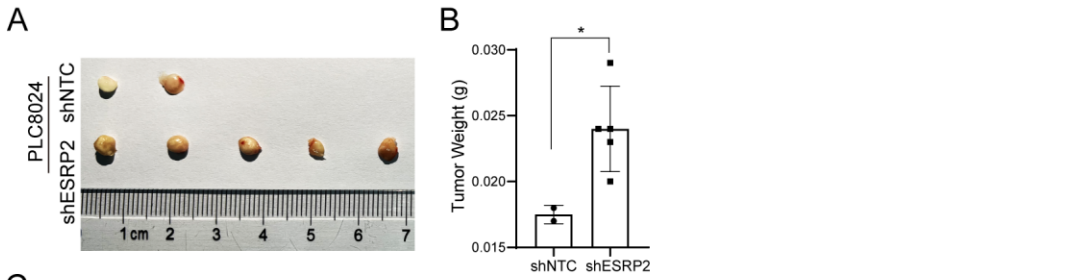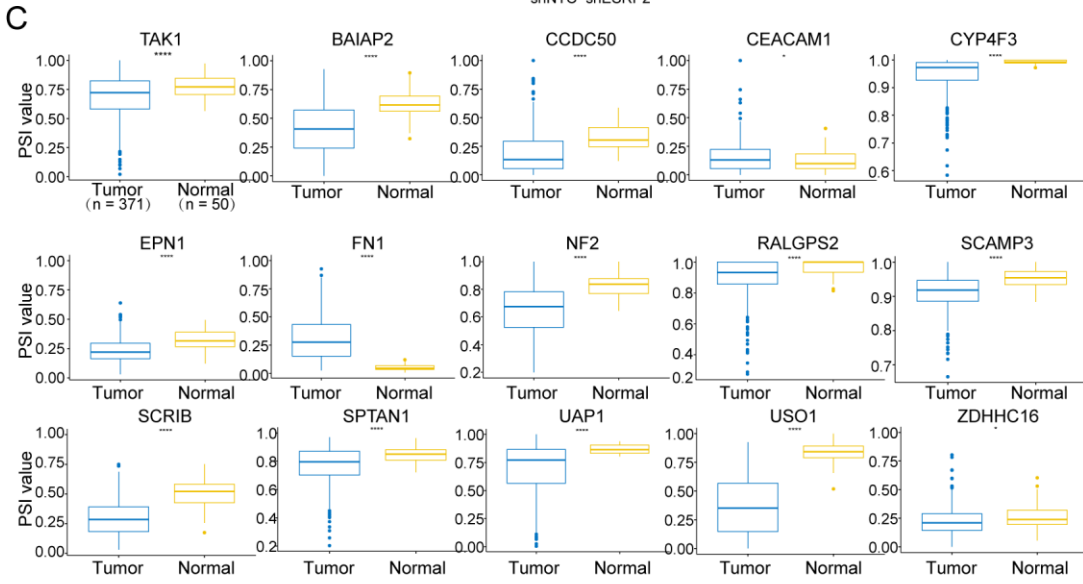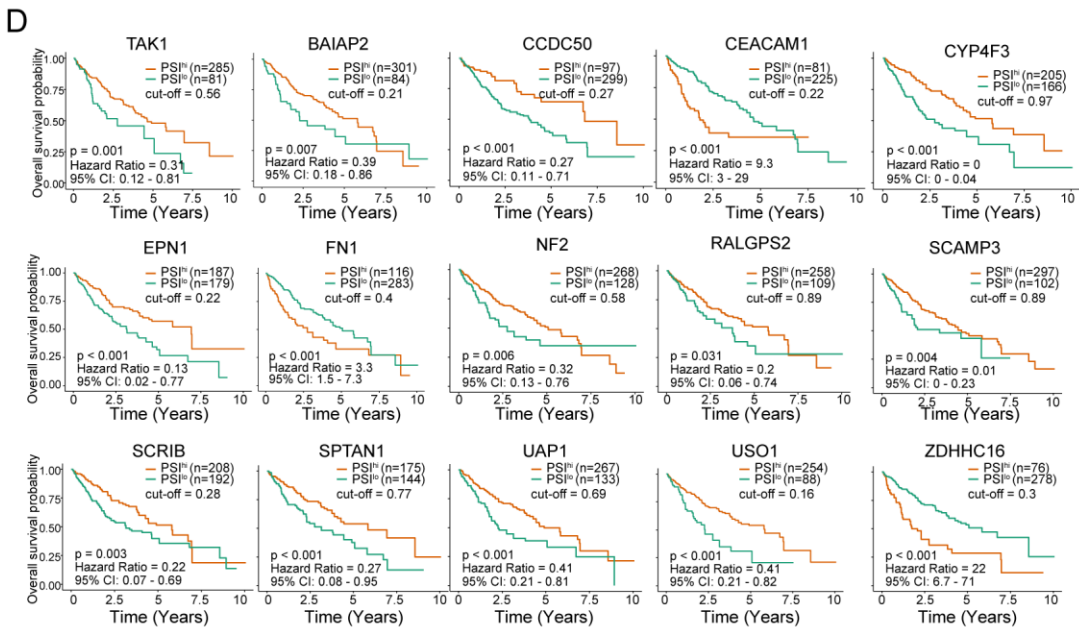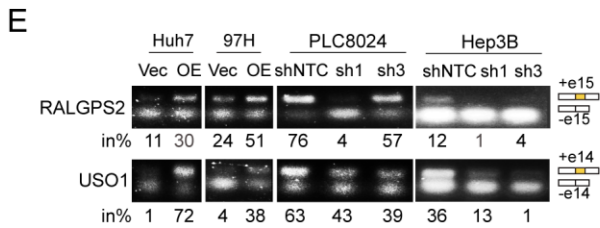

**Supplementary Figure 2. The expression and prognostic value of ESRP2-regulated AS targets in HCC.**

**(A, B)** Images of xenograft tumors induced by subcutaneous injection of indicated cells into nude mice **(A)**. The average tumor weight was expressed as the mean  $\pm$  SD **(B)**. **(C)** The PSI index of each AS target was analyzed in TCGA cohort divided by tumor and non-tumor. Student's *t*-test was used to compare the means between two groups. \**P* < 0.05, \*\*\*\**P* < .0001. **(D)** Kaplan-Meier analysis of the OS of HCC patients from TCGA cohort stratified by the PSI level of AS targets. The *P* values of the log-rank tests, Hazard ratio (HR), and 95% confidence interval (CI) were presented. The optimal cutoff point was determined and survival curves were generated using survminer R package. **(E)** RT-PCR validation of ESRP2-regulated AS events. The structure of each PCR product was indicated schematically on the right. Alternative exons affected by ESRP2 were painted in orange. The percentage of exon inclusion products (in%) out of the total products was indicated below each gel.

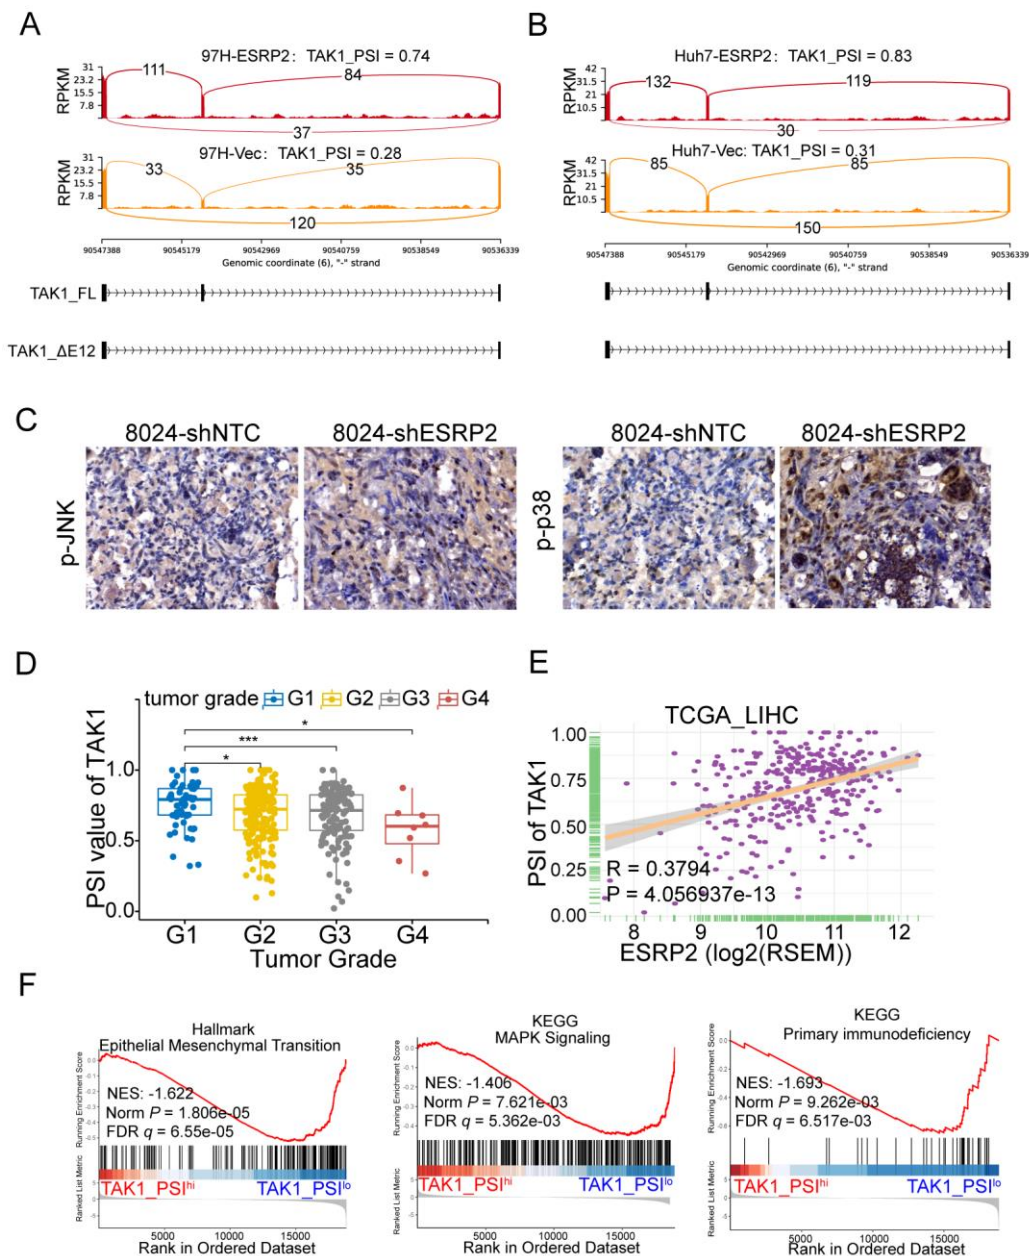

**Supplementary Figure 3. ESRP2-regulated TAK1 splicing was correlated with MAPK signaling activation.**

(A, B) IGV visualization of TAK1 variants expression in Vec- or ESRP2- transfected 97H (A) or Huh7 (B) cells. The PSI index was calculated based on the RNA-seq data. (C) Representative images of IHC staining for p-JNK and p-p38 in xenograft tumors induced by shNTC- or shESRP2- transfected HCC cells. (D) The PSI index of TAK1 exon 12 was analyzed in TCGA-HCC cohorts divided by different

tumor grade. **(E)** The association between ESRP2 expression and the PSI index of TAK1 exon 12 in the TCGA-HCC cohort was analyzed. Pearson coefficient R was used to denote the correlation. **(F)** Representative gene sets enriched by GSEA analysis of DEGs from HCC specimens with low or high TAK1 PSI index in the TCGA cohort.

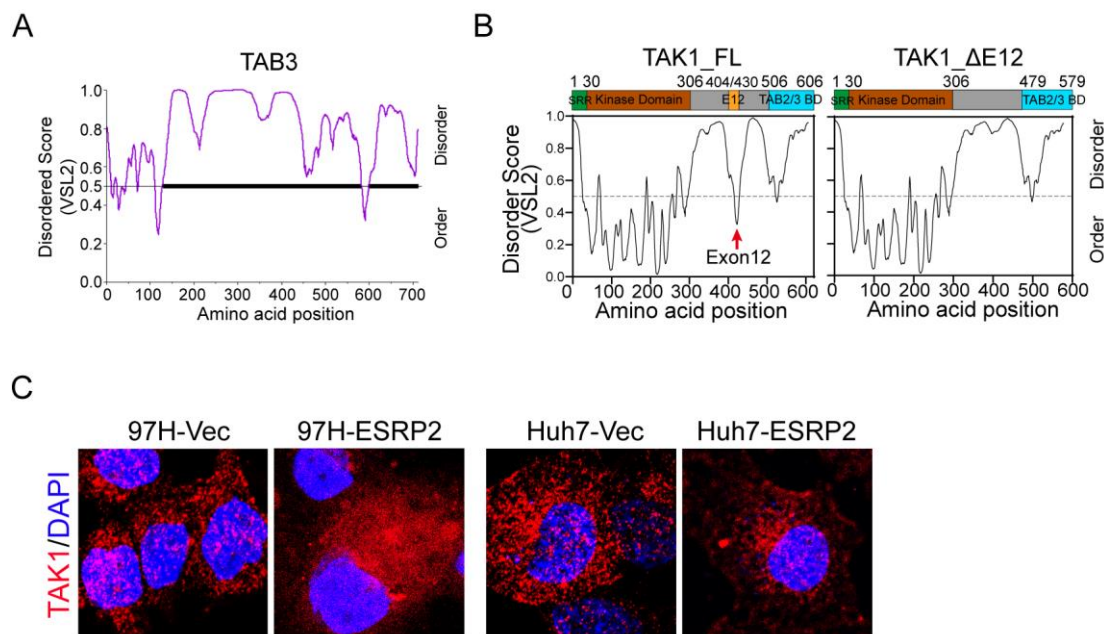

**Supplementary Figure 4. Graph of intrinsic disorder of TAB3 and TAK1 isoforms.**

**(A)** Graph of intrinsic disorder of TAB3 as calculated by the VSL2 algorithm (<http://www.pondr.com/>).

**(B)** Graph of intrinsic disorder of TAK1\_FL (left) and TAK1\_ΔE12 (right) as visualized by the VSL2 algorithm. The serine rich region (SRR), kinase domain, TAB2/3 binding domain and exon 12 position were indicated above the disorder score graph. **(C)** Immunofluorescence staining of TAK1 (red) in Vec- or ESRP2- transfected HCC cells. Cell nuclei were counterstained with DAPI (blue).

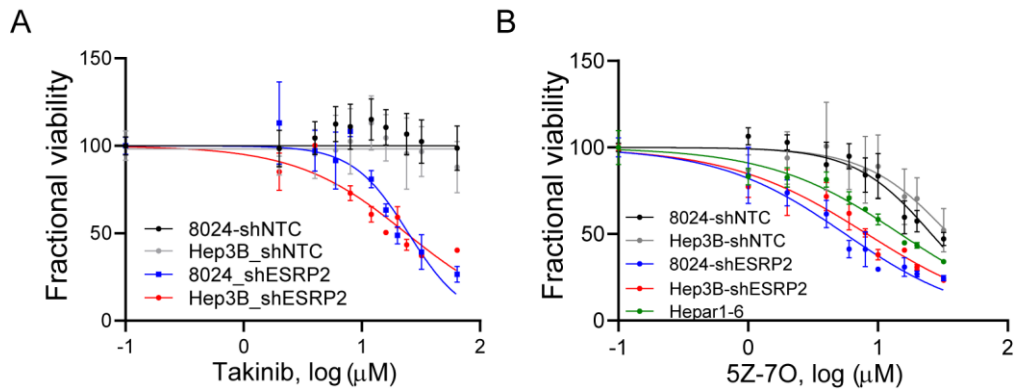

**Supplementary Figure 5. HCC cells with low expression of ESRP2 are sensitive to TAK1 inhibitors.**

(A, B) PLC8024 and Hep3B cells transfected with shNTC or shESRP2, as well as ESRP2-low-expressed Hepar1-6 cells, were treated with varying concentrations of Takinib (A) or 5Z-7-oxozeaenol (B) for 48 h. Cell viability was determined by XTT assay. Data were represented as means  $\pm$  SD.



**Supplementary Table 1. Relative expression value (RPKM) of oncofetal drivers or suppressors**

**identified from RNA-seq data**

| <b>Gene_name</b> | <b>Fetal hepatocytes</b> | <b>Adult liver 1</b> | <b>Adult liver 2</b> | <b>HCC</b>  | <b>Type</b>          |
|------------------|--------------------------|----------------------|----------------------|-------------|----------------------|
| A2M              | 270.6283096              | 576.3739758          | 850.6861498          | 297.9099072 | Oncofetal suppressor |
| FTL              | 1026.025848              | 2996.0248            | 3330.526934          | 1298.174822 | Oncofetal suppressor |
| ENG              | 1.628205211              | 13.28095459          | 16.09747711          | 4.196338601 | Oncofetal suppressor |
| CXCL12           | 0.818101177              | 44.32602377          | 37.80556619          | 2.472448972 | Oncofetal suppressor |
| PHYHD1           | 1.572662101              | 6.576480437          | 5.798253746          | 1.90358389  | Oncofetal suppressor |
| SORL1            | 2.436358443              | 11.92096292          | 14.94488348          | 6.037531137 | Oncofetal suppressor |
| CLIC2            | 0.126412757              | 5.060803714          | 8.077838848          | 1.331457362 | Oncofetal suppressor |
| CDA              | 1.218789026              | 24.22624101          | 15.88834167          | 11.22224491 | Oncofetal suppressor |
| ITGB2            | 0.103606929              | 3.071871861          | 5.271404027          | 1.382582067 | Oncofetal suppressor |
| ACSS3            | 8.506874961              | 8.356253811          | 22.21017239          | 1.308638057 | Oncofetal suppressor |
| FUCA1            | 11.02899172              | 34.26172395          | 40.22890748          | 16.07880355 | Oncofetal suppressor |
| ECHDC3           | 0.492922971              | 19.959834            | 36.69029951          | 5.017686662 | Oncofetal suppressor |
| LGMN             | 11.33268036              | 20.35358362          | 26.10362964          | 12.17730106 | Oncofetal suppressor |
| DHTKD1           | 5.624192013              | 45.23365382          | 47.62041977          | 27.73863413 | Oncofetal suppressor |
| GZMA             | 0                        | 5.689077436          | 9.107655656          | 1.051164464 | Oncofetal suppressor |
| FCGR3A           | 0                        | 32.8200919           | 51.92706499          | 12.96489977 | Oncofetal suppressor |
| TSPAN33          | 1.078762713              | 5.345801586          | 5.30287274           | 1.810779993 | Oncofetal suppressor |
| ALDH8A1          | 0.621078449              | 55.59920836          | 70.86056444          | 32.22811813 | Oncofetal suppressor |
| RANBP10          | 2.362621813              | 4.33882036           | 5.052563128          | 1.898053565 | Oncofetal suppressor |
| LY96             | 0.682446263              | 8.61643143           | 16.52899022          | 1.732479346 | Oncofetal suppressor |
| PROZ             | 11.48891961              | 10.84332259          | 37.9775951           | 1.738626562 | Oncofetal suppressor |
| ZFP36            | 28.07527871              | 40.8874681           | 92.82328616          | 32.23507915 | Oncofetal suppressor |
| FNDC4            | 5.225086803              | 9.267094995          | 11.78886958          | 0.891830539 | Oncofetal suppressor |
| DGAT2            | 6.650668915              | 37.00040158          | 35.81900006          | 10.47563411 | Oncofetal suppressor |
| ORM2             | 1.374940459              | 585.59722            | 504.4956483          | 341.5249318 | Oncofetal suppressor |
| KYNU             | 2.984433577              | 15.17680722          | 15.07936874          | 4.293700719 | Oncofetal suppressor |
| 42065            | 4.78754059               | 64.00773704          | 53.79343177          | 28.44794276 | Oncofetal suppressor |
| GNG11            | 5.743851922              | 25.76040488          | 27.26036986          | 16.98998307 | Oncofetal suppressor |
| AIF1             | 1.548187942              | 20.99682069          | 29.74556021          | 6.356473422 | Oncofetal suppressor |
| ALAS1            | 17.15675108              | 45.76191034          | 146.5797501          | 18.62506868 | Oncofetal suppressor |
| PECR             | 3.857780221              | 38.01160237          | 36.70911475          | 13.6484791  | Oncofetal suppressor |
| GIMAP4           | 0.762568549              | 26.53083455          | 32.66225206          | 11.10059008 | Oncofetal suppressor |
| NDUFA4           | 12.46074077              | 22.54844544          | 22.30577898          | 13.26379354 | Oncofetal suppressor |
| SUCLG2           | 38.30983141              | 76.40747864          | 83.49674754          | 28.42828854 | Oncofetal suppressor |
| AKR7A2           | 5.752755049              | 8.254992879          | 9.360121652          | 4.572949054 | Oncofetal suppressor |
| UGT2B4           | 0.149787221              | 258.0812335          | 405.9191942          | 32.20027523 | Oncofetal suppressor |
| MGST2            | 4.100789999              | 17.31035688          | 15.94123929          | 6.588678472 | Oncofetal suppressor |
| MSR1             | 0.383560076              | 4.024938169          | 6.831587125          | 3.485677816 | Oncofetal suppressor |

|          |             |             |             |             |                      |
|----------|-------------|-------------|-------------|-------------|----------------------|
| GCSH     | 4.950373233 | 27.56815976 | 25.33931736 | 14.50790674 | Oncofetal suppressor |
| C19orf60 | 1.94790919  | 8.995488651 | 6.102216207 | 4.250954876 | Oncofetal suppressor |
| C1QTNF1  | 1.812072447 | 4.259085431 | 5.978327939 | 0.852767922 | Oncofetal suppressor |
| ADK      | 15.20386651 | 22.5407429  | 28.46706669 | 6.528492271 | Oncofetal suppressor |
| GLT1D1   | 0.21860937  | 3.597835375 | 7.792189884 | 1.333212664 | Oncofetal suppressor |
| ARSE     | 9.282798471 | 28.06322732 | 22.24975028 | 7.734599592 | Oncofetal suppressor |
| APOH     | 2.280627477 | 5336.515553 | 5245.633526 | 1556.021935 | Oncofetal suppressor |
| HAL      | 0.751318609 | 29.54638257 | 31.18376793 | 11.95698848 | Oncofetal suppressor |
| QTRT1    | 1.350531624 | 4.052335664 | 4.998020402 | 2.360825126 | Oncofetal suppressor |
| NADKD1   | 7.258825359 | 42.05501719 | 52.21934347 | 21.11062246 | Oncofetal suppressor |
| PSAT1    | 11.44790091 | 47.53488653 | 66.38408338 | 7.291235253 | Oncofetal suppressor |
| BRI3     | 6.714408798 | 10.46532586 | 10.40444645 | 3.494962718 | Oncofetal suppressor |
| SHH      | 1.800707207 | 4.09127173  | 4.557434844 | 1.154713076 | Oncofetal suppressor |
| NPY1R    | 0.657374254 | 7.566540214 | 6.448397405 | 0.471048136 | Oncofetal suppressor |
| PQLC1    | 1.63858142  | 6.978061614 | 6.315429254 | 1.987489705 | Oncofetal suppressor |
| PCBD1    | 11.84045676 | 89.25420399 | 77.56021084 | 22.63818232 | Oncofetal suppressor |
| TNFRSF1B | 3.233881977 | 7.321206759 | 10.8614352  | 5.210485319 | Oncofetal suppressor |
| PHLDA1   | 2.414588872 | 1.898609418 | 11.37005266 | 3.399614349 | Oncofetal suppressor |
| C1QB     | 0           | 116.1520612 | 151.9691467 | 18.4057425  | Oncofetal suppressor |
| PTH1R    | 2.820753126 | 16.49689714 | 6.405802595 | 0.251675755 | Oncofetal suppressor |
| NAAA     | 1.694664669 | 9.377842048 | 7.116191981 | 3.483358177 | Oncofetal suppressor |
| CD163    | 0.800507627 | 21.4378391  | 35.44888666 | 3.133162939 | Oncofetal suppressor |
| ACSM3    | 2.040735335 | 21.31061552 | 16.41634928 | 2.511948547 | Oncofetal suppressor |
| ZFP1     | 2.272601097 | 9.192418189 | 10.23973869 | 2.094103916 | Oncofetal suppressor |
| ICAM1    | 2.705481052 | 6.65440736  | 18.12343769 | 2.150626423 | Oncofetal suppressor |
| CHRD     | 0.765497843 | 3.804090832 | 4.765313067 | 1.216755758 | Oncofetal suppressor |
| ATP6V0E2 | 0.505126193 | 7.359746028 | 7.399568185 | 1.314979953 | Oncofetal suppressor |
| RNMTL1   | 2.36711361  | 4.058417892 | 4.718489493 | 2.871340633 | Oncofetal suppressor |
| C3AR1    | 0.154496926 | 3.830257837 | 7.259018586 | 2.315712163 | Oncofetal suppressor |
| PCOLCE   | 2.009455165 | 6.861801944 | 4.260941562 | 2.248881423 | Oncofetal suppressor |
| 42064    | 1.400176741 | 11.20299331 | 13.21720733 | 2.403300797 | Oncofetal suppressor |
| CYP4F12  | 0           | 7.011256124 | 13.13578073 | 6.313946464 | Oncofetal suppressor |
| CTSC     | 1.470061348 | 3.793930219 | 5.634518114 | 1.32643652  | Oncofetal suppressor |
| IGFBP4   | 77.05342004 | 201.3768839 | 265.5316751 | 128.571534  | Oncofetal suppressor |
| HAMP     | 0.162832108 | 1458.33542  | 1172.818445 | 5.646467334 | Oncofetal suppressor |
| GYS2     | 0.224845562 | 76.92128294 | 66.77273006 | 7.879753974 | Oncofetal suppressor |
| GCKR     | 0.837522731 | 27.95412283 | 27.58446087 | 5.023491272 | Oncofetal suppressor |
| MT1A     | 0.278952782 | 17.78333996 | 4.726157805 | 0.113003972 | Oncofetal suppressor |
| MT1M     | 0.102608428 | 39.65233719 | 13.35452247 | 0.023752427 | Oncofetal suppressor |
| ZGPAT    | 0.886438311 | 11.67551543 | 7.092518479 | 1.864247189 | Oncofetal suppressor |
| SUOX     | 2.36293839  | 8.309681995 | 9.558596176 | 3.641264168 | Oncofetal suppressor |
| STEAP3   | 0.84671314  | 18.84362396 | 24.56732421 | 1.965449096 | Oncofetal suppressor |
| SORD     | 9.889236204 | 144.4662912 | 93.26731544 | 14.92015716 | Oncofetal suppressor |
| IL7R     | 0.205071724 | 4.26775447  | 7.676376308 | 1.01904968  | Oncofetal suppressor |

|          |             |             |             |             |                      |
|----------|-------------|-------------|-------------|-------------|----------------------|
| AADAC    | 0.390014212 | 170.224182  | 215.1489877 | 116.2171149 | Oncofetal suppressor |
| ABHD14B  | 6.871319193 | 49.52058655 | 45.13221211 | 25.60961005 | Oncofetal suppressor |
| POLB     | 2.505377796 | 3.044052629 | 6.235677529 | 1.950845969 | Oncofetal suppressor |
| VSIG4    | 0           | 9.882290145 | 10.36018673 | 1.08199241  | Oncofetal suppressor |
| KHK      | 0.135374144 | 20.05290278 | 21.82286887 | 11.07040087 | Oncofetal suppressor |
| ARHGAP30 | 0.286306692 | 5.005491942 | 7.528785317 | 3.026605196 | Oncofetal suppressor |
| CYP39A1  | 0.160277654 | 26.19715078 | 28.90429963 | 4.360053356 | Oncofetal suppressor |
| ACSM1    | 1.433240158 | 2.201849311 | 10.66535718 | 3.764201272 | Oncofetal suppressor |
| NR2F1    | 0.663948791 | 6.950338557 | 5.488414385 | 1.448688863 | Oncofetal suppressor |
| CCND1    | 12.72466507 | 21.0346081  | 41.72867174 | 7.092297732 | Oncofetal suppressor |
| SLC17A3  | 0.088366094 | 6.972602642 | 4.874605183 | 1.058351056 | Oncofetal suppressor |
| SLC17A1  | 0.520170514 | 18.03244226 | 19.28497789 | 4.871223076 | Oncofetal suppressor |
| PROSC    | 9.260395678 | 20.71715768 | 19.63715461 | 8.00774972  | Oncofetal suppressor |
| LEPR     | 3.420403755 | 21.02437599 | 22.76529064 | 11.94025001 | Oncofetal suppressor |
| GSTZ1    | 1.053896577 | 6.58521176  | 4.943668121 | 0.453988825 | Oncofetal suppressor |
| MGST1    | 34.74683099 | 143.6404751 | 170.467734  | 96.54840645 | Oncofetal suppressor |
| PAFAH2   | 3.013672021 | 7.259283108 | 7.486334587 | 4.072386164 | Oncofetal suppressor |
| N4BP2L1  | 2.631259127 | 22.84051959 | 18.00790131 | 11.41098688 | Oncofetal suppressor |
| SELL     | 0.243226353 | 5.002347912 | 6.740655191 | 0.936046112 | Oncofetal suppressor |
| HINT2    | 1.014712584 | 8.924301753 | 9.23231832  | 2.148726882 | Oncofetal suppressor |
| MPDZ     | 11.55069409 | 24.653589   | 20.96661169 | 7.383500893 | Oncofetal suppressor |
| CREB3L3  | 22.61313579 | 42.16983159 | 43.66238624 | 17.60738222 | Oncofetal suppressor |
| DNASE2   | 3.544782073 | 10.16244072 | 10.23276069 | 6.311693489 | Oncofetal suppressor |
| KIAA0664 | 2.87902988  | 14.25844823 | 13.98259401 | 5.972217434 | Oncofetal suppressor |
| EPHX1    | 18.76013163 | 369.6307729 | 399.9893007 | 161.9938113 | Oncofetal suppressor |
| KLRB1    | 0.14304036  | 4.451006068 | 8.381345694 | 0.988940837 | Oncofetal suppressor |
| SDSL     | 0.448640666 | 10.12836054 | 10.23056881 | 2.25161434  | Oncofetal suppressor |
| NINJ1    | 5.699517318 | 9.440241763 | 11.88413702 | 3.286930486 | Oncofetal suppressor |
| ASGR2    | 8.609339631 | 95.81447104 | 103.3806336 | 24.83296266 | Oncofetal suppressor |
| CCL21    | 0.014943899 | 33.65017962 | 42.70247148 | 1.162326569 | Oncofetal suppressor |
| DECR2    | 1.996990722 | 3.113112117 | 4.947785995 | 2.162933672 | Oncofetal suppressor |
| SNX10    | 4.512577003 | 16.32973474 | 27.70928759 | 7.083277907 | Oncofetal suppressor |
| ACAA2    | 55.97556292 | 368.575663  | 377.3740506 | 45.03895192 | Oncofetal suppressor |
| BST2     | 26.97465927 | 50.12558191 | 92.67872538 | 31.43267586 | Oncofetal suppressor |
| SERPING1 | 37.24716446 | 660.5368958 | 586.1422315 | 126.9705478 | Oncofetal suppressor |
| FAH      | 1.968684676 | 16.48639928 | 13.53040486 | 8.923937903 | Oncofetal suppressor |
| A1BG     | 1.860896222 | 111.6660615 | 157.8514966 | 26.07435476 | Oncofetal suppressor |
| RCAN1    | 8.486079564 | 5.456811404 | 23.10955591 | 4.798458197 | Oncofetal suppressor |
| C8orf4   | 23.92510901 | 22.05160707 | 56.40959248 | 9.08174638  | Oncofetal suppressor |
| UROS     | 3.126439154 | 5.677949027 | 6.360286786 | 2.729551667 | Oncofetal suppressor |
| RNF125   | 0.411613947 | 6.7772629   | 3.720727394 | 1.248009754 | Oncofetal suppressor |
| GIMAP2   | 0.026338889 | 4.467817006 | 5.1893426   | 2.400728159 | Oncofetal suppressor |
| APOA2    | 240.6419386 | 5375.293063 | 6760.375938 | 335.976952  | Oncofetal suppressor |
| ICAM3    | 1.51439355  | 6.856024498 | 7.216415969 | 1.862468163 | Oncofetal suppressor |

|          |             |             |             |             |                      |
|----------|-------------|-------------|-------------|-------------|----------------------|
| SLC39A14 | 21.68746422 | 43.36167353 | 43.3561812  | 23.49916376 | Oncofetal suppressor |
| NAGLU    | 2.235134254 | 5.592224095 | 6.503190336 | 2.156993801 | Oncofetal suppressor |
| MPDU1    | 3.361253067 | 7.953128667 | 8.473022457 | 2.675394954 | Oncofetal suppressor |
| CETP     | 0.0993393   | 7.950093415 | 11.88202973 | 0.300476748 | Oncofetal suppressor |
| DDO      | 0           | 4.000420049 | 5.529226223 | 2.9530175   | Oncofetal suppressor |
| BLVRB    | 10.76842667 | 72.38277481 | 67.62083299 | 37.91137703 | Oncofetal suppressor |
| CBS      | 9.990861483 | 56.87978554 | 49.31046563 | 10.07569411 | Oncofetal suppressor |
| CRYAA    | 0.06066189  | 2.973912685 | 6.166584814 | 0           | Oncofetal suppressor |
| PCK1     | 4.361176105 | 482.8573007 | 212.8177232 | 37.11944141 | Oncofetal suppressor |
| ACSM2B   | 0.731468583 | 116.666836  | 109.3784081 | 54.71190883 | Oncofetal suppressor |
| ECSIT    | 6.399301829 | 9.955668223 | 9.920242925 | 3.878648122 | Oncofetal suppressor |
| GBP4     | 1.235004598 | 10.64681489 | 14.31257177 | 5.66034258  | Oncofetal suppressor |
| BOK      | 4.778145366 | 18.555423   | 16.84075001 | 4.55094713  | Oncofetal suppressor |
| SLC17A9  | 1.20204988  | 6.967927094 | 8.497295892 | 4.854529559 | Oncofetal suppressor |
| MYD88    | 6.438501547 | 10.02977464 | 14.68000925 | 6.007369336 | Oncofetal suppressor |
| FXYD1    | 1.162577955 | 205.5473724 | 143.0693878 | 52.54935073 | Oncofetal suppressor |
| LAPTM5   | 4.757363334 | 22.93715233 | 36.0606415  | 11.747788   | Oncofetal suppressor |
| UROCI    | 0           | 35.8815736  | 38.9307906  | 0.409991581 | Oncofetal suppressor |
| SORBS2   | 2.655987307 | 10.30669504 | 13.85899667 | 7.112320042 | Oncofetal suppressor |
| HLF      | 0.457971776 | 14.57259497 | 29.43983881 | 6.356974007 | Oncofetal suppressor |
| SOD1     | 13.85603649 | 124.2511268 | 121.2901169 | 63.10155226 | Oncofetal suppressor |
| MRPL34   | 10.08509406 | 31.37610818 | 30.67573185 | 10.26281527 | Oncofetal suppressor |
| SLC43A1  | 0.554827138 | 15.09674358 | 16.72838003 | 8.870140297 | Oncofetal suppressor |
| CYP2A6   | 0.25846249  | 481.4004331 | 375.4695821 | 33.89849948 | Oncofetal suppressor |
| MST1     | 13.8651988  | 24.86015047 | 23.73471413 | 8.608395414 | Oncofetal suppressor |
| ACBD4    | 2.107350416 | 11.5451587  | 13.20882356 | 7.561246872 | Oncofetal suppressor |
| TBX15    | 0.141491946 | 4.582442636 | 14.37702781 | 3.174562449 | Oncofetal suppressor |
| ARHGAP25 | 0.145375465 | 3.890992268 | 4.973329598 | 1.226572065 | Oncofetal suppressor |
| ATP5D    | 8.520815994 | 22.7227908  | 20.55485676 | 5.262010078 | Oncofetal suppressor |
| CHCHD10  | 4.304897791 | 50.25169957 | 39.12794359 | 11.12158503 | Oncofetal suppressor |
| C16orf70 | 3.61118757  | 6.596789857 | 6.22984878  | 2.404398677 | Oncofetal suppressor |
| MT2A     | 14.21209666 | 392.7076784 | 297.0359968 | 8.508964206 | Oncofetal suppressor |
| MT1G     | 1.785855713 | 654.0325571 | 263.6131939 | 1.849649013 | Oncofetal suppressor |
| AMFR     | 8.522787483 | 12.01572631 | 15.68551025 | 6.46995822  | Oncofetal suppressor |
| PHYH     | 2.854748816 | 91.46382086 | 129.1373476 | 54.57039013 | Oncofetal suppressor |
| CBR4     | 6.663586944 | 20.36154877 | 19.93253026 | 6.664271031 | Oncofetal suppressor |
| CNDP1    | 0.038478926 | 9.149428839 | 3.693817689 | 0.280581131 | Oncofetal suppressor |
| AQP9     | 0           | 166.1811384 | 182.733342  | 49.77784792 | Oncofetal suppressor |
| ADRA1A   | 0.042501185 | 8.316774764 | 10.46873914 | 0.443822713 | Oncofetal suppressor |
| LAP3     | 6.621351479 | 22.16345955 | 36.79957713 | 14.5539562  | Oncofetal suppressor |
| PRKACA   | 12.34070394 | 22.27322193 | 26.06764142 | 15.50677681 | Oncofetal suppressor |
| CSF1R    | 0.989169491 | 7.843138133 | 12.82548734 | 1.66366593  | Oncofetal suppressor |
| GIMAP5   | 0           | 3.117194202 | 5.054747064 | 0.79764203  | Oncofetal suppressor |
| AKR1CL1  | 0           | 6.496364626 | 4.399597361 | 0.808140677 | Oncofetal suppressor |

|            |             |             |             |             |                      |
|------------|-------------|-------------|-------------|-------------|----------------------|
| ETFDH      | 5.184591702 | 42.81858792 | 43.81073818 | 8.909079223 | Oncofetal suppressor |
| GBP7       | 0.011253596 | 27.27877237 | 21.09491523 | 7.877675423 | Oncofetal suppressor |
| LACTB2     | 5.591912611 | 14.07583178 | 18.98466759 | 8.864169668 | Oncofetal suppressor |
| FCHSD2     | 3.12160604  | 5.390454026 | 5.918447117 | 3.731835302 | Oncofetal suppressor |
| GSTK1      | 12.02498939 | 44.72798227 | 46.62969662 | 15.64859118 | Oncofetal suppressor |
| OGDHL      | 1.032476179 | 18.04790875 | 17.91913401 | 2.040467946 | Oncofetal suppressor |
| NIPAL1     | 1.692256024 | 4.344781726 | 4.526010309 | 2.207176727 | Oncofetal suppressor |
| GOT1       | 5.960245467 | 46.33805656 | 58.35686904 | 24.61395503 | Oncofetal suppressor |
| CPN1       | 3.629490573 | 16.99022472 | 18.53777361 | 7.458262148 | Oncofetal suppressor |
| DYSF       | 1.896852309 | 3.705243827 | 4.399108768 | 2.516029527 | Oncofetal suppressor |
| APOC4      | 0.083136174 | 66.66511188 | 53.88074315 | 16.44736628 | Oncofetal suppressor |
| AC020907.3 | 0.933648013 | 6.613377315 | 6.025213985 | 2.90633347  | Oncofetal suppressor |
| SLC22A10   | 0           | 9.303617271 | 35.78521824 | 4.827986348 | Oncofetal suppressor |
| MGLL       | 3.298250484 | 12.3084644  | 16.656209   | 9.258302147 | Oncofetal suppressor |
| UBE2L6     | 9.603492328 | 16.16744727 | 23.99287593 | 12.17017287 | Oncofetal suppressor |
| SMOC1      | 0.398221218 | 16.48147205 | 13.61517257 | 8.234986633 | Oncofetal suppressor |
| AVPI1      | 3.260129017 | 9.200339373 | 14.65951963 | 4.545598344 | Oncofetal suppressor |
| EXOC3L4    | 0.103164434 | 4.757285499 | 4.368965786 | 1.716686201 | Oncofetal suppressor |
| TRIM22     | 2.853381135 | 6.923033412 | 18.6662271  | 6.411379836 | Oncofetal suppressor |
| DIO1       | 5.996445776 | 39.74776224 | 51.20376511 | 10.1382687  | Oncofetal suppressor |
| GBP5       | 0.03704629  | 2.717038667 | 6.150683801 | 0.673972226 | Oncofetal suppressor |
| ARID3C     | 0.088074745 | 7.223714877 | 4.703954356 | 1.316163908 | Oncofetal suppressor |
| CECR1      | 0.556424025 | 5.245887237 | 7.940932887 | 2.071110733 | Oncofetal suppressor |
| ACSL5      | 12.56741073 | 51.3779467  | 47.66409235 | 25.30765563 | Oncofetal suppressor |
| MT1H       | 0.076393708 | 62.37179291 | 20.44194157 | 0.092841438 | Oncofetal suppressor |
| SLC39A5    | 9.593890533 | 20.59123574 | 24.37889188 | 1.803548063 | Oncofetal suppressor |
| HCLS1      | 0.281965231 | 8.272073105 | 11.49785135 | 4.173580821 | Oncofetal suppressor |
| RDH16      | 0.223484715 | 59.95263261 | 53.75112417 | 4.287422952 | Oncofetal suppressor |
| CD36       | 0.189399108 | 7.838193661 | 13.38516404 | 4.914926057 | Oncofetal suppressor |
| CISD3      | 0.601482116 | 6.45650839  | 6.216526533 | 3.411251707 | Oncofetal suppressor |
| HADH       | 7.150335886 | 25.61218557 | 28.83526911 | 9.315572566 | Oncofetal suppressor |
| ENPEP      | 1.123837904 | 9.553995563 | 11.39068017 | 2.962465316 | Oncofetal suppressor |
| TMEM220    | 1.798839899 | 15.88366132 | 15.06482593 | 5.963633217 | Oncofetal suppressor |
| XAF1       | 0.200868594 | 17.78109409 | 26.74250239 | 10.45588401 | Oncofetal suppressor |
| ECI1       | 1.746301347 | 6.908315021 | 7.487474916 | 4.268782695 | Oncofetal suppressor |
| ALDH6A1    | 16.72896122 | 106.4794994 | 82.17168885 | 27.99862873 | Oncofetal suppressor |
| GADD45G    | 3.143916022 | 8.146154533 | 5.210368399 | 3.08034125  | Oncofetal suppressor |
| FBXW5      | 6.292649803 | 8.402389246 | 11.1186157  | 4.678614632 | Oncofetal suppressor |
| SULT2A1    | 4.12785539  | 377.8341495 | 551.7407139 | 75.5810602  | Oncofetal suppressor |
| FECH       | 2.521924838 | 5.548090642 | 6.614231964 | 1.878534124 | Oncofetal suppressor |
| LPXN       | 1.432869744 | 4.824375459 | 5.365208901 | 1.959040888 | Oncofetal suppressor |
| SLC1A2     | 0.028300055 | 10.06097434 | 11.07396429 | 0.106389376 | Oncofetal suppressor |
| ECHS1      | 15.47334005 | 188.0080423 | 197.7289989 | 64.68900843 | Oncofetal suppressor |
| PIGV       | 1.955680055 | 5.296976669 | 3.902241728 | 1.819357266 | Oncofetal suppressor |

|              |             |             |             |             |                      |
|--------------|-------------|-------------|-------------|-------------|----------------------|
| CFP          | 0.057332843 | 4.436835323 | 5.118754974 | 0.239590152 | Oncofetal suppressor |
| CTSD         | 9.664332631 | 50.60953606 | 81.32735271 | 27.21681259 | Oncofetal suppressor |
| ASL          | 2.914480876 | 15.9746266  | 20.55537217 | 9.487245284 | Oncofetal suppressor |
| LBP          | 14.89253655 | 54.62295172 | 92.61517149 | 9.470205379 | Oncofetal suppressor |
| SPRYD4       | 0.722940457 | 14.14238609 | 13.60068168 | 3.02448327  | Oncofetal suppressor |
| 42065        | 6.287870094 | 8.664071869 | 13.40182972 | 3.450634946 | Oncofetal suppressor |
| KMO          | 0.192747647 | 9.627251153 | 14.11873701 | 2.069648931 | Oncofetal suppressor |
| NR1H3        | 4.768994996 | 10.64622796 | 10.03345223 | 6.002991485 | Oncofetal suppressor |
| MCOLN1       | 1.758586762 | 3.788010348 | 4.418189927 | 1.324065407 | Oncofetal suppressor |
| COQ10A       | 1.213483311 | 3.771567693 | 4.47406781  | 2.43549171  | Oncofetal suppressor |
| MOCOS        | 0.562254608 | 4.819225386 | 10.7301309  | 2.248969731 | Oncofetal suppressor |
| ASPA         | 0.099067789 | 6.422889727 | 3.938645171 | 1.643518649 | Oncofetal suppressor |
| EHHADH       | 2.74694301  | 121.9702134 | 127.5812564 | 41.31242484 | Oncofetal suppressor |
| DCAF11       | 4.342504089 | 25.87361732 | 20.62223797 | 9.851953212 | Oncofetal suppressor |
| FPR3         | 0.071317487 | 4.916699515 | 12.47966292 | 4.258054313 | Oncofetal suppressor |
| GNPNAT1      | 5.152659376 | 19.69239158 | 21.09920829 | 12.6356988  | Oncofetal suppressor |
| C2orf42      | 1.453090403 | 5.831347201 | 4.129962078 | 3.192875862 | Oncofetal suppressor |
| ADCK3        | 2.644040907 | 7.85937124  | 6.765542806 | 2.9442774   | Oncofetal suppressor |
| TST          | 5.234843937 | 28.78471962 | 33.71233458 | 13.22624452 | Oncofetal suppressor |
| FABP1        | 7.61945753  | 444.3891559 | 763.152618  | 86.24430077 | Oncofetal suppressor |
| GPSM3        | 1.616165756 | 4.520298245 | 5.338746571 | 2.522292539 | Oncofetal suppressor |
| PIGR         | 0.015777151 | 6.719443473 | 22.90109784 | 5.542565929 | Oncofetal suppressor |
| AGT          | 62.49534671 | 494.9446398 | 438.3900502 | 188.5595818 | Oncofetal suppressor |
| LILRB2       | 0.00362419  | 2.983297147 | 5.114793073 | 0.552028852 | Oncofetal suppressor |
| HIBADH       | 13.67144824 | 76.84262705 | 71.85363978 | 20.29430695 | Oncofetal suppressor |
| SARDH        | 0.819475533 | 21.90491992 | 13.90543512 | 5.079142917 | Oncofetal suppressor |
| LYVE1        | 0.439975598 | 19.85311463 | 11.52724797 | 0.687475657 | Oncofetal suppressor |
| GIMAP6       | 0.112392022 | 4.627042217 | 5.681757226 | 2.035845394 | Oncofetal suppressor |
| TMEM56       | 7.127937014 | 28.84497749 | 28.85300008 | 11.11484595 | Oncofetal suppressor |
| CD4          | 0.753227292 | 33.59835498 | 24.16538426 | 3.900819195 | Oncofetal suppressor |
| ECM2         | 4.250374687 | 16.60079626 | 17.91941297 | 6.599276094 | Oncofetal suppressor |
| LYPLAL1      | 3.83146255  | 5.928831868 | 10.75959758 | 3.907666682 | Oncofetal suppressor |
| SAMD9L       | 0.046446518 | 3.353471048 | 7.504135722 | 3.474598932 | Oncofetal suppressor |
| COX5B        | 16.39539655 | 38.25311456 | 39.04408136 | 21.28787801 | Oncofetal suppressor |
| SLC47A1      | 1.105811948 | 25.57432199 | 24.44949172 | 6.18544105  | Oncofetal suppressor |
| C11orf71     | 1.286217081 | 7.833084269 | 4.893175575 | 2.111082615 | Oncofetal suppressor |
| ETNK2        | 3.217349448 | 11.80186145 | 11.44464476 | 1.328623291 | Oncofetal suppressor |
| ABCC9        | 7.355648544 | 14.26836876 | 13.85967959 | 7.885344141 | Oncofetal suppressor |
| CYP4F2       | 0           | 44.85917807 | 67.94340717 | 15.77089513 | Oncofetal suppressor |
| APOF         | 0.144925323 | 189.4513754 | 95.0770389  | 0.678419181 | Oncofetal suppressor |
| CPN2         | 0.684023913 | 95.03385716 | 112.5741324 | 25.04232208 | Oncofetal suppressor |
| RP3-402G11.5 | 3.412597136 | 11.48508197 | 13.03985808 | 6.609225958 | Oncofetal suppressor |
| S100A9       | 1.172616939 | 22.73243876 | 27.75453461 | 4.265557208 | Oncofetal suppressor |
| CES1         | 0.023507257 | 291.7267004 | 314.327542  | 44.85622832 | Oncofetal suppressor |

|            |             |             |             |             |                      |
|------------|-------------|-------------|-------------|-------------|----------------------|
| BRP44L     | 11.95198347 | 65.62190537 | 105.5436264 | 49.72337787 | Oncofetal suppressor |
| PROC       | 2.374229182 | 85.59186608 | 82.70693164 | 14.68037091 | Oncofetal suppressor |
| LRAT       | 0.191729316 | 4.944946324 | 5.490820724 | 0.417197155 | Oncofetal suppressor |
| MMAB       | 2.638909085 | 5.961038448 | 8.628713267 | 1.609283382 | Oncofetal suppressor |
| UGT1A4     | 0           | 19.00729453 | 14.42108519 | 4.879513301 | Oncofetal suppressor |
| SQRDL      | 1.895939442 | 4.627693524 | 4.261267062 | 2.840322631 | Oncofetal suppressor |
| CYP2C18    | 0.116928245 | 30.2924184  | 27.16665857 | 2.333936538 | Oncofetal suppressor |
| ABAT       | 6.644753184 | 59.31814319 | 51.63791234 | 24.79504762 | Oncofetal suppressor |
| ADH1A      | 0           | 243.4106574 | 471.6622026 | 121.0101382 | Oncofetal suppressor |
| TENC1      | 2.467144854 | 7.607536743 | 6.794648422 | 2.930591082 | Oncofetal suppressor |
| CLEC1B     | 0.090298612 | 7.288287528 | 8.117324391 | 0.018290016 | Oncofetal suppressor |
| CD1D       | 1.556712531 | 3.975671348 | 6.003278571 | 0.744833104 | Oncofetal suppressor |
| ACAT1      | 4.240866596 | 94.32364237 | 132.3830614 | 44.06438512 | Oncofetal suppressor |
| TTC38      | 5.974017859 | 23.92335578 | 30.25200721 | 15.10829627 | Oncofetal suppressor |
| TDO2       | 1.280088034 | 121.2434179 | 141.2187148 | 5.691458786 | Oncofetal suppressor |
| PIPOX      | 0.640023322 | 91.18323105 | 92.80919233 | 60.43840244 | Oncofetal suppressor |
| ASPDH      | 1.319251216 | 40.06765935 | 32.78207548 | 4.293251221 | Oncofetal suppressor |
| ALDH2      | 23.33388604 | 368.829835  | 316.695189  | 43.85251924 | Oncofetal suppressor |
| VSNL1      | 1.555849321 | 8.093633871 | 7.020269254 | 3.845848791 | Oncofetal suppressor |
| AP006621.5 | 2.594735016 | 6.260980083 | 5.79379107  | 4.014362063 | Oncofetal suppressor |
| POR        | 7.473396973 | 26.02203941 | 36.84311941 | 10.26487258 | Oncofetal suppressor |
| EHD3       | 1.979754728 | 5.892107989 | 4.167033892 | 1.091893188 | Oncofetal suppressor |
| HSD17B7    | 1.761176914 | 3.260445426 | 9.764172934 | 3.114240402 | Oncofetal suppressor |
| FCN2       | 0           | 29.392431   | 14.30098883 | 0.013820128 | Oncofetal suppressor |
| MTHFD1     | 3.03872721  | 66.69060263 | 63.46334098 | 20.9485353  | Oncofetal suppressor |
| FAM195A    | 0.83121914  | 2.747348165 | 5.5300262   | 2.462633728 | Oncofetal suppressor |
| C1QBP      | 12.28837779 | 17.3372032  | 20.63304511 | 12.63911919 | Oncofetal suppressor |
| ACACB      | 0.317922244 | 12.31198544 | 12.88974465 | 5.997055905 | Oncofetal suppressor |
| MAP1LC3A   | 1.912140582 | 4.277180636 | 4.708626275 | 1.092072437 | Oncofetal suppressor |
| LYRM2      | 3.678358362 | 3.713018082 | 24.70103377 | 3.317934111 | Oncofetal suppressor |
| RGN        | 12.78331881 | 66.66126479 | 70.89608815 | 16.85529807 | Oncofetal suppressor |
| CD8A       | 0.015182147 | 2.682860292 | 5.563453515 | 0.528925683 | Oncofetal suppressor |
| TLR4       | 4.581703918 | 6.295684139 | 8.894667701 | 3.861098041 | Oncofetal suppressor |
| HGD        | 31.60648176 | 161.9204213 | 167.8995936 | 25.66762293 | Oncofetal suppressor |
| GSTO1      | 19.10768822 | 44.6163736  | 46.32485794 | 14.05205393 | Oncofetal suppressor |
| CHST13     | 0.246987818 | 4.051489648 | 4.713057808 | 2.52638729  | Oncofetal suppressor |
| TRPM8      | 0.026208078 | 4.804534823 | 7.770989585 | 1.735511083 | Oncofetal suppressor |
| ASGR1      | 9.722449689 | 55.90070001 | 59.94756964 | 26.30291064 | Oncofetal suppressor |
| SAT2       | 27.87685682 | 71.5492178  | 51.90585822 | 18.99746019 | Oncofetal suppressor |
| PRG4       | 0.360926234 | 88.66056038 | 129.1465145 | 4.612307463 | Oncofetal suppressor |
| INSIG1     | 6.620351992 | 54.90244006 | 154.8575229 | 14.65088756 | Oncofetal suppressor |
| SERPINA7   | 25.43351993 | 56.94828632 | 109.2570749 | 16.1256668  | Oncofetal suppressor |
| SAMD5      | 1.446361349 | 5.346553457 | 2.906374271 | 0.400055517 | Oncofetal suppressor |
| RNF130     | 4.850979857 | 35.10727949 | 31.002195   | 18.2071707  | Oncofetal suppressor |

|            |             |             |             |             |                      |
|------------|-------------|-------------|-------------|-------------|----------------------|
| TTPAL      | 2.522871299 | 4.788251582 | 6.365733406 | 3.084315394 | Oncofetal suppressor |
| FST        | 7.106390248 | 20.83397513 | 17.40331758 | 4.928632649 | Oncofetal suppressor |
| CFHR4      | 0           | 52.28531111 | 44.79914254 | 3.939439704 | Oncofetal suppressor |
| SDHB       | 15.98426636 | 44.1682843  | 52.56984246 | 19.9664524  | Oncofetal suppressor |
| QDPR       | 5.073676006 | 25.55898075 | 27.74636884 | 5.398036089 | Oncofetal suppressor |
| FETUB      | 0.054577718 | 56.55468354 | 51.62019288 | 16.91374667 | Oncofetal suppressor |
| SRD5A1     | 1.671690403 | 10.76214362 | 9.376913349 | 4.728811663 | Oncofetal suppressor |
| FNDC5      | 0.91057333  | 6.566367307 | 13.53498158 | 1.24739969  | Oncofetal suppressor |
| AGMO       | 0.076990035 | 25.37882721 | 23.24797105 | 8.863833715 | Oncofetal suppressor |
| 42251      | 0.070660843 | 4.114649079 | 7.927761132 | 1.446597526 | Oncofetal suppressor |
| CCL2       | 0.507550795 | 5.754348356 | 26.57111363 | 1.228022015 | Oncofetal suppressor |
| AC008537.2 | 1.038418742 | 40.73604902 | 18.22250535 | 5.426946847 | Oncofetal suppressor |
| UGT1A9     | 0           | 11.3780214  | 20.50031852 | 5.426997043 | Oncofetal suppressor |
| ASB13      | 1.675449044 | 8.125013083 | 8.258502239 | 3.320589326 | Oncofetal suppressor |
| CRHBP      | 4.285801488 | 42.59293072 | 62.88066473 | 0.606665633 | Oncofetal suppressor |
| SCP2       | 7.433629807 | 53.88680525 | 81.39897695 | 28.67906101 | Oncofetal suppressor |
| NAT2       | 0.752033068 | 43.47211721 | 28.62053902 | 0.761622837 | Oncofetal suppressor |
| P2RY13     | 0.079931477 | 3.024617117 | 6.275572095 | 0.501894631 | Oncofetal suppressor |
| RAMP3      | 0           | 4.487648434 | 5.327260314 | 0.391989952 | Oncofetal suppressor |
| CFI        | 13.77251036 | 183.4337246 | 242.3882985 | 21.28868785 | Oncofetal suppressor |
| NDRG2      | 3.286525618 | 30.55139374 | 24.76329866 | 10.84362167 | Oncofetal suppressor |
| CCR1       | 0.879758445 | 4.95365869  | 14.53969648 | 2.212080681 | Oncofetal suppressor |
| FOLH1      | 0.220266194 | 12.17489122 | 11.10034476 | 4.622406195 | Oncofetal suppressor |
| PDK4       | 22.79767694 | 201.6975105 | 71.66558898 | 14.28441224 | Oncofetal suppressor |
| LDB2       | 2.115966218 | 6.218656408 | 5.630128968 | 3.208414597 | Oncofetal suppressor |
| GPER       | 0.22801666  | 5.571207637 | 3.045197035 | 2.501087592 | Oncofetal suppressor |
| ETS1       | 9.043942838 | 13.55355543 | 15.90943192 | 9.773521889 | Oncofetal suppressor |
| NMRK1      | 3.13318466  | 19.2433489  | 18.84512957 | 11.31764748 | Oncofetal suppressor |
| FAM176A    | 2.324843724 | 13.7700137  | 18.69674051 | 0.782791362 | Oncofetal suppressor |
| ACADL      | 0.737191439 | 11.50064912 | 10.50341775 | 0.464546102 | Oncofetal suppressor |
| IRF1       | 1.527945177 | 3.060038751 | 6.788547434 | 3.25336682  | Oncofetal suppressor |
| PPP1R3B    | 10.90357171 | 9.839302397 | 64.7044435  | 19.03561298 | Oncofetal suppressor |
| OLFM2      | 2.962073617 | 11.3141091  | 16.47286822 | 8.913826212 | Oncofetal suppressor |
| EDNRB      | 11.15348516 | 14.80033409 | 19.99568424 | 4.830465316 | Oncofetal suppressor |
| PANK1      | 6.885679401 | 38.70773125 | 32.96928319 | 20.97060188 | Oncofetal suppressor |
| DHRS1      | 1.330574657 | 7.154651683 | 7.753254506 | 2.87177387  | Oncofetal suppressor |
| CDNF       | 1.808686058 | 5.822103585 | 3.963538722 | 2.956622098 | Oncofetal suppressor |
| GCH1       | 3.99131237  | 11.01781133 | 19.902476   | 2.44143722  | Oncofetal suppressor |
| ECM1       | 1.084927071 | 15.99497776 | 12.04178374 | 1.085443509 | Oncofetal suppressor |
| MAT1A      | 11.14382347 | 381.8976695 | 305.1184662 | 29.94825752 | Oncofetal suppressor |
| AKR1C1     | 2.911686229 | 24.01108971 | 29.57125932 | 8.73811038  | Oncofetal suppressor |
| GHR        | 11.55501677 | 54.98712211 | 78.08800079 | 20.50355154 | Oncofetal suppressor |
| AGFG2      | 1.915699831 | 7.247152703 | 9.414745856 | 5.436444096 | Oncofetal suppressor |
| COQ9       | 3.378593007 | 8.3669753   | 10.93677547 | 4.434595741 | Oncofetal suppressor |



|          |             |             |             |             |                      |
|----------|-------------|-------------|-------------|-------------|----------------------|
| RANBP3L  | 0.410590625 | 8.95776922  | 5.467612195 | 0.465725558 | Oncofetal suppressor |
| NR1I2    | 0.010264384 | 17.28117833 | 18.21513484 | 6.765243922 | Oncofetal suppressor |
| CCDC25   | 10.88865101 | 17.20451934 | 17.27655753 | 11.16201347 | Oncofetal suppressor |
| TMEM176A | 7.445850323 | 119.2208283 | 141.0782957 | 24.86373222 | Oncofetal suppressor |
| ACADM    | 7.029767715 | 57.27112481 | 48.37936892 | 31.09247892 | Oncofetal suppressor |
| HSD17B8  | 1.426804176 | 9.407609839 | 8.633881071 | 5.044358344 | Oncofetal suppressor |
| AADAT    | 3.34434535  | 22.15923658 | 17.54037948 | 0.960742256 | Oncofetal suppressor |
| ID1      | 17.6493629  | 18.68742319 | 70.22980165 | 1.887248816 | Oncofetal suppressor |
| SHMT2    | 9.975098951 | 18.18651309 | 16.92548731 | 11.15039482 | Oncofetal suppressor |
| GPT      | 0.360735746 | 14.22558521 | 13.19665343 | 1.372038791 | Oncofetal suppressor |
| RILP     | 1.066216569 | 5.368639633 | 6.731893975 | 1.151800255 | Oncofetal suppressor |
| HFE2     | 0           | 62.48984723 | 55.2902284  | 0.509172899 | Oncofetal suppressor |
| IFI6     | 8.987278167 | 8.450738367 | 34.61842295 | 7.889375567 | Oncofetal suppressor |
| NECAB2   | 0           | 3.129540987 | 5.260025705 | 1.349590293 | Oncofetal suppressor |
| KLKB1    | 0.046759779 | 102.4541235 | 118.0076103 | 37.20291278 | Oncofetal suppressor |
| COMMD1   | 2.088927182 | 4.593429511 | 4.805935478 | 2.425984171 | Oncofetal suppressor |
| SIGLEC7  | 0.015744769 | 5.705439321 | 6.380138034 | 0.676091038 | Oncofetal suppressor |
| AHSG     | 111.3924968 | 680.4558935 | 952.3389888 | 115.9723313 | Oncofetal suppressor |
| CYP3A5   | 1.177519745 | 104.3450393 | 126.96879   | 48.59227875 | Oncofetal suppressor |
| TOLLIP   | 4.583488413 | 10.17344022 | 10.47761361 | 5.269275297 | Oncofetal suppressor |
| CRYZ     | 24.93657419 | 28.71470782 | 46.74913001 | 13.20775804 | Oncofetal suppressor |
| PGLYRP2  | 0           | 39.59726007 | 32.07484149 | 1.767374871 | Oncofetal suppressor |
| SLC17A2  | 0.188783475 | 30.62141971 | 20.94499455 | 1.625668078 | Oncofetal suppressor |
| CD2      | 0           | 6.7084014   | 10.95150674 | 3.184975557 | Oncofetal suppressor |
| PLGLB1   | 1.783911706 | 14.33712749 | 13.49410809 | 6.267719681 | Oncofetal suppressor |
| SLC6A12  | 0.068032475 | 6.105266976 | 10.33811386 | 0.830737276 | Oncofetal suppressor |
| MRPL41   | 9.716044771 | 16.77320946 | 16.63417287 | 7.730116394 | Oncofetal suppressor |
| MMAA     | 1.462294685 | 3.948195781 | 5.094409813 | 1.932328177 | Oncofetal suppressor |
| CD97     | 0.260854112 | 5.777534711 | 10.26565783 | 2.432192642 | Oncofetal suppressor |
| IL13RA2  | 0           | 4.457635289 | 4.153164884 | 0.013760631 | Oncofetal suppressor |
| ABCG2    | 6.351526996 | 13.74023259 | 12.79130727 | 4.68910541  | Oncofetal suppressor |
| KEAP1    | 4.585680106 | 7.173770023 | 7.586327772 | 4.837791664 | Oncofetal suppressor |
| PRCP     | 3.908968085 | 6.41002369  | 9.326087376 | 2.3392299   | Oncofetal suppressor |
| ZNF385B  | 0.977753142 | 7.433785106 | 5.381361999 | 0.349737717 | Oncofetal suppressor |
| SLC25A47 | 0.092105588 | 46.10422321 | 53.09986699 | 0.808427526 | Oncofetal suppressor |
| ARHGDI1  | 12.44179838 | 41.21185954 | 46.00552815 | 20.40554977 | Oncofetal suppressor |
| PXMP2    | 0.525127593 | 9.808696888 | 7.394155096 | 2.858212603 | Oncofetal suppressor |
| PCCB     | 2.469409877 | 9.691440613 | 10.17491052 | 2.159648134 | Oncofetal suppressor |
| CDHR2    | 0.38212567  | 16.1518762  | 24.42468325 | 0.142248081 | Oncofetal suppressor |
| SLC25A18 | 0.81154284  | 10.23332805 | 12.01106669 | 0.730033006 | Oncofetal suppressor |
| THRSP    | 0.10585474  | 51.61840441 | 148.6853446 | 0.62893352  | Oncofetal suppressor |
| ESYT1    | 5.965186628 | 8.190760985 | 11.6476039  | 6.195530708 | Oncofetal suppressor |
| TMBIM6   | 71.09630383 | 179.8496506 | 185.6218384 | 93.56038469 | Oncofetal suppressor |
| AHR      | 3.094968766 | 14.7919326  | 12.76832188 | 8.511891435 | Oncofetal suppressor |

|          |             |             |             |             |                      |
|----------|-------------|-------------|-------------|-------------|----------------------|
| ZCCHC6   | 11.02264846 | 32.2975697  | 19.54757216 | 14.97212488 | Oncofetal suppressor |
| RETSAT   | 4.776510324 | 26.28473174 | 27.99138514 | 11.43926699 | Oncofetal suppressor |
| PLIN5    | 0.141535083 | 14.45354473 | 17.56195437 | 6.898663143 | Oncofetal suppressor |
| C1S      | 5.824541954 | 277.5095247 | 298.5908491 | 169.7913243 | Oncofetal suppressor |
| GLTPD2   | 2.22712302  | 4.830788443 | 6.563496839 | 0.852997724 | Oncofetal suppressor |
| NFIC     | 4.57502704  | 38.3907195  | 40.6243069  | 24.72624816 | Oncofetal suppressor |
| CPT2     | 3.840788574 | 11.71538993 | 16.37273999 | 6.407833577 | Oncofetal suppressor |
| GREM2    | 1.102666232 | 6.888434978 | 8.555246483 | 0.262917155 | Oncofetal suppressor |
| SLC10A1  | 31.90905344 | 175.955074  | 160.3913188 | 26.48065258 | Oncofetal suppressor |
| ITIH1    | 2.629113088 | 324.5963785 | 234.5908962 | 61.29795115 | Oncofetal suppressor |
| F11      | 0.065086791 | 74.04206545 | 69.35167576 | 37.02412812 | Oncofetal suppressor |
| ACADSB   | 10.36440032 | 174.9777703 | 87.44643322 | 45.13590014 | Oncofetal suppressor |
| C8G      | 0.633773094 | 32.6363043  | 47.93456831 | 18.85687568 | Oncofetal suppressor |
| FAHD2A   | 2.474013269 | 13.78322435 | 13.07865189 | 7.302909115 | Oncofetal suppressor |
| C3       | 9.543673812 | 1240.147643 | 1297.861162 | 398.8582988 | Oncofetal suppressor |
| CLDN2    | 1.639972406 | 5.55540671  | 10.17907829 | 0.590536886 | Oncofetal suppressor |
| GADD45A  | 23.16487812 | 27.72700956 | 68.87799283 | 27.51157889 | Oncofetal suppressor |
| ACOT2    | 2.324489705 | 13.17563158 | 9.550251845 | 6.971038993 | Oncofetal suppressor |
| C16orf45 | 0.610284849 | 4.053480788 | 5.158431559 | 0.964639654 | Oncofetal suppressor |
| RCL1     | 1.627710602 | 8.900105138 | 13.3266416  | 2.903721384 | Oncofetal suppressor |
| CYP2C8   | 1.740118523 | 1000.448935 | 823.9113989 | 158.2422178 | Oncofetal suppressor |
| ABCA6    | 0.027249693 | 39.68633756 | 42.264951   | 17.79465883 | Oncofetal suppressor |
| NAGS     | 0.233584193 | 5.86188393  | 4.76532011  | 1.665402181 | Oncofetal suppressor |
| MAN2B2   | 2.821222728 | 6.322236013 | 6.635302017 | 3.980589676 | Oncofetal suppressor |
| AR       | 0.682758501 | 30.30626725 | 21.59494248 | 3.927705608 | Oncofetal suppressor |
| GCAT     | 2.036408394 | 9.472752122 | 8.11430305  | 2.150193559 | Oncofetal suppressor |
| PION     | 0.677857994 | 4.596998422 | 8.505757113 | 3.969838021 | Oncofetal suppressor |
| SLC28A1  | 0.216686536 | 4.250842227 | 10.14314206 | 0.496410305 | Oncofetal suppressor |
| CD3E     | 0.014565572 | 5.408457489 | 7.075976576 | 1.313849978 | Oncofetal suppressor |
| HMGCS2   | 35.18906347 | 910.3392529 | 753.5104149 | 276.0688353 | Oncofetal suppressor |
| UCK1     | 4.273955129 | 9.223157675 | 7.357432243 | 4.952752208 | Oncofetal suppressor |
| DAO      | 0.024892387 | 17.60038924 | 22.46957395 | 1.734434901 | Oncofetal suppressor |
| C1R      | 2.031822922 | 134.334135  | 133.9104883 | 62.12624371 | Oncofetal suppressor |
| ADAMTS13 | 0.640097447 | 5.918850379 | 3.221947494 | 0.424315529 | Oncofetal suppressor |
| PLG      | 26.36635528 | 513.6405254 | 514.8770081 | 183.2422697 | Oncofetal suppressor |
| GRAMD1C  | 0.339110673 | 6.61353197  | 5.626921431 | 2.495627242 | Oncofetal suppressor |
| DUSP1    | 25.01746372 | 58.49991491 | 50.36234763 | 31.40670866 | Oncofetal suppressor |
| AGPAT2   | 12.39509157 | 18.82758151 | 26.99930715 | 9.594527446 | Oncofetal suppressor |
| IYD      | 1.142018477 | 7.008809926 | 5.159701863 | 2.472411743 | Oncofetal suppressor |
| GPHN     | 2.972191511 | 9.272397649 | 7.634897659 | 4.182934106 | Oncofetal suppressor |
| CASP1    | 0.204043243 | 5.720402406 | 7.376667385 | 2.693150007 | Oncofetal suppressor |
| EMILIN1  | 2.106329907 | 4.943355102 | 5.525241724 | 2.467848948 | Oncofetal suppressor |
| STAP2    | 3.326185032 | 9.625330248 | 18.71658983 | 5.112988308 | Oncofetal suppressor |
| SPP2     | 0.392959572 | 95.14290348 | 118.6034703 | 52.69129551 | Oncofetal suppressor |

|          |             |             |             |             |                      |
|----------|-------------|-------------|-------------|-------------|----------------------|
| ADI1     | 10.33057183 | 149.5511094 | 133.5556564 | 57.40280779 | Oncofetal suppressor |
| HBA1     | 0           | 28.4578276  | 11.23004416 | 0.643107634 | Oncofetal suppressor |
| SLCO1B1  | 0.179648595 | 112.5358608 | 80.3371414  | 15.81994771 | Oncofetal suppressor |
| SLC25A27 | 2.011943918 | 12.1975837  | 11.44054645 | 6.630285084 | Oncofetal suppressor |
| LPAR6    | 1.062962789 | 7.246303405 | 6.211249601 | 3.344194525 | Oncofetal suppressor |
| REEP6    | 23.88345543 | 49.76430064 | 60.92592639 | 15.59794249 | Oncofetal suppressor |
| FTCD     | 3.910091918 | 86.69928631 | 77.71879784 | 33.42048168 | Oncofetal suppressor |
| CYP1A1   | 2.604858645 | 34.57649134 | 7.841341117 | 0.377798432 | Oncofetal suppressor |
| SLC25A25 | 2.881438255 | 8.018960856 | 28.62967584 | 5.212844401 | Oncofetal suppressor |
| ALDH1L1  | 0.382860404 | 23.63221795 | 15.88181854 | 1.501992231 | Oncofetal suppressor |
| SLC27A2  | 12.00452691 | 100.178346  | 108.4536312 | 18.27833197 | Oncofetal suppressor |
| CYP2D6   | 0.490060055 | 90.67881559 | 86.32137068 | 34.03396535 | Oncofetal suppressor |
| COMT     | 3.120458718 | 9.037154473 | 13.37795796 | 2.131957515 | Oncofetal suppressor |
| PDSS2    | 4.50189717  | 5.80603616  | 7.769860917 | 3.807019191 | Oncofetal suppressor |
| BBOX1    | 0.297009994 | 22.46316626 | 17.95539739 | 1.389343476 | Oncofetal suppressor |
| IFI30    | 0.856320169 | 38.18955931 | 69.23180984 | 31.56752816 | Oncofetal suppressor |
| APOM     | 3.967767241 | 59.01993955 | 54.18709281 | 12.33309012 | Oncofetal suppressor |
| MOGAT2   | 0.223519426 | 21.18325242 | 23.97933879 | 0.518960981 | Oncofetal suppressor |
| CYP2C19  | 0.011067189 | 25.36083269 | 5.891936715 | 1.416731068 | Oncofetal suppressor |
| APOD     | 0.075420097 | 14.88342392 | 0.474236933 | 0.325895843 | Oncofetal suppressor |
| RELN     | 0.502432752 | 9.782547212 | 8.139307718 | 0.086723978 | Oncofetal suppressor |
| AGPAT9   | 1.250220039 | 4.369996974 | 3.805473334 | 1.896824456 | Oncofetal suppressor |
| MRPL40   | 7.469759276 | 21.29332877 | 17.77246593 | 12.34313919 | Oncofetal suppressor |
| RASGEF1B | 0.794136661 | 3.943049773 | 4.891659519 | 1.703712872 | Oncofetal suppressor |
| APOC1    | 126.0706224 | 3627.005476 | 4090.583909 | 2075.127971 | Oncofetal suppressor |
| MASP1    | 8.949693495 | 16.08334318 | 19.42156093 | 4.303123589 | Oncofetal suppressor |
| MSRA     | 0.252143289 | 4.789119701 | 5.488849169 | 1.128953665 | Oncofetal suppressor |
| MARCO    | 0.059775596 | 60.9318337  | 69.90166046 | 0.882507209 | Oncofetal suppressor |
| F13B     | 0.067631817 | 93.0387672  | 118.4047209 | 42.31117779 | Oncofetal suppressor |
| CPB2     | 0.329723164 | 599.7722084 | 497.5644817 | 312.7257572 | Oncofetal suppressor |
| AMBP     | 9.612999819 | 1604.336763 | 1424.318805 | 705.3159086 | Oncofetal suppressor |
| SLC16A13 | 1.190929224 | 6.590774065 | 9.651831241 | 2.744583292 | Oncofetal suppressor |
| C7       | 0.264372252 | 86.47293983 | 72.78904865 | 5.958898706 | Oncofetal suppressor |
| MSH3     | 3.328151347 | 7.438031853 | 8.19879577  | 4.908293565 | Oncofetal suppressor |
| KLHL2    | 3.42351142  | 7.232458834 | 6.752049489 | 4.114371887 | Oncofetal suppressor |
| C9       | 0.04679147  | 437.4747936 | 412.3748566 | 9.113688006 | Oncofetal suppressor |
| SERPINC1 | 2.999731324 | 888.03938   | 760.0555849 | 265.857644  | Oncofetal suppressor |
| F8       | 0.24444316  | 7.2325563   | 6.003511329 | 2.313668951 | Oncofetal suppressor |
| TIMD4    | 2.26436109  | 7.587638636 | 4.59095463  | 0.143889302 | Oncofetal suppressor |
| IL8      | 0.133588206 | 0.561414519 | 8.416913849 | 2.17450651  | Oncofetal suppressor |
| CTSF     | 0.233632588 | 14.3768918  | 14.44416333 | 6.744885554 | Oncofetal suppressor |
| MASP2    | 2.319225638 | 38.44084847 | 30.44169789 | 6.526637307 | Oncofetal suppressor |
| CXCL10   | 0.058858324 | 4.05505154  | 28.99919687 | 1.506912301 | Oncofetal suppressor |
| CST7     | 0.014847487 | 4.561069422 | 5.29040478  | 0.818002945 | Oncofetal suppressor |

|            |             |             |             |             |                      |
|------------|-------------|-------------|-------------|-------------|----------------------|
| CYP2A7     | 0.060271334 | 52.03084404 | 20.75981622 | 1.211031654 | Oncofetal suppressor |
| DHRS4      | 1.767205208 | 12.73887296 | 11.7273227  | 6.125158458 | Oncofetal suppressor |
| OAS1       | 0.194232468 | 3.918127721 | 9.084660484 | 2.248923548 | Oncofetal suppressor |
| MYLK       | 2.863670669 | 8.967210981 | 7.693916615 | 5.298441489 | Oncofetal suppressor |
| MRPL16     | 7.205051885 | 16.01238323 | 19.03953741 | 11.34010533 | Oncofetal suppressor |
| ABCA8      | 1.103018916 | 15.75412297 | 16.02064572 | 0.410425077 | Oncofetal suppressor |
| SEMA4G     | 5.354507419 | 9.70175299  | 10.41670814 | 6.431739488 | Oncofetal suppressor |
| STAB1      | 0.294734112 | 4.597438732 | 4.572128196 | 0.910798353 | Oncofetal suppressor |
| MPND       | 2.101242154 | 7.336249448 | 7.503384557 | 2.702268894 | Oncofetal suppressor |
| HLA-DMA    | 0.589120715 | 10.99689124 | 15.40231751 | 7.561538982 | Oncofetal suppressor |
| HLA-DOA    | 0.024092009 | 2.612397555 | 5.535362529 | 1.087508314 | Oncofetal suppressor |
| UGT1A3     | 0.005841016 | 4.041596186 | 5.019486769 | 1.012733566 | Oncofetal suppressor |
| PPP1R1A    | 3.278919283 | 22.93537341 | 10.78416661 | 9.941855963 | Oncofetal suppressor |
| BLOC1S1    | 3.024962625 | 7.244834301 | 8.616698189 | 3.524332687 | Oncofetal suppressor |
| GNE        | 7.170059301 | 25.37342523 | 24.3531692  | 9.204015676 | Oncofetal suppressor |
| CYP4F3     | 0.005466414 | 63.9216845  | 56.06533015 | 21.85660552 | Oncofetal suppressor |
| MT1E       | 5.880282225 | 345.3533873 | 326.6478845 | 1.212322079 | Oncofetal suppressor |
| LRG1       | 1.520449379 | 82.55003272 | 117.2515244 | 16.17772481 | Oncofetal suppressor |
| COX14      | 3.235700257 | 6.07357294  | 6.860821458 | 4.084770277 | Oncofetal suppressor |
| EI24       | 19.55929555 | 39.51244166 | 49.66234169 | 14.24021891 | Oncofetal suppressor |
| AQP7       | 0.785830399 | 7.021306113 | 5.850148566 | 2.322012749 | Oncofetal suppressor |
| PID1       | 10.19193462 | 15.86577974 | 16.54134955 | 6.458358394 | Oncofetal suppressor |
| AC069257.9 | 1.293944589 | 4.847285043 | 6.984338523 | 3.043613497 | Oncofetal suppressor |
| ART4       | 4.427934039 | 12.57826732 | 12.030332   | 2.235762128 | Oncofetal suppressor |
| OAS2       | 0.134466463 | 3.293808782 | 7.854528169 | 1.335914772 | Oncofetal suppressor |
| TMEM192    | 7.787279969 | 12.61077578 | 13.47559523 | 6.625200201 | Oncofetal suppressor |
| UGT1A1     | 0.145284005 | 21.66989013 | 32.76638698 | 5.950581217 | Oncofetal suppressor |
| ACP5       | 0.040900956 | 8.429232166 | 17.76275159 | 3.777733493 | Oncofetal suppressor |
| FXN        | 1.216847277 | 5.324715605 | 4.214704318 | 2.032687302 | Oncofetal suppressor |
| CPVL       | 4.684026458 | 9.691443887 | 14.00867134 | 2.210682493 | Oncofetal suppressor |
| ABCB11     | 0.694295117 | 23.31354821 | 22.75550105 | 5.190811454 | Oncofetal suppressor |
| FMO3       | 0.099683531 | 80.07570653 | 170.7302435 | 26.52927321 | Oncofetal suppressor |
| C4BPA      | 0.260211178 | 301.6223782 | 456.450112  | 22.16396297 | Oncofetal suppressor |
| FCER1G     | 0.701867192 | 38.83284914 | 39.40944805 | 9.00561944  | Oncofetal suppressor |
| CD74       | 9.770662884 | 264.5947924 | 397.1111065 | 108.9505933 | Oncofetal suppressor |
| SLC27A4    | 1.384192351 | 3.855013048 | 4.656808399 | 1.719333922 | Oncofetal suppressor |
| FAM149A    | 0.603346321 | 10.86781587 | 9.554767084 | 5.595840611 | Oncofetal suppressor |
| UGT2B15    | 0.106370055 | 247.1146567 | 406.0374057 | 159.8014358 | Oncofetal suppressor |
| SERPINA11  | 6.267932945 | 168.9290471 | 224.9708157 | 37.83703724 | Oncofetal suppressor |
| GLYAT      | 3.274866408 | 140.2266563 | 93.14986959 | 5.78817944  | Oncofetal suppressor |
| PIR        | 0.87400393  | 3.942828181 | 6.329060495 | 1.166837987 | Oncofetal suppressor |
| RBL2       | 8.01350214  | 19.39076396 | 15.89675508 | 9.01231438  | Oncofetal suppressor |
| ACMSD      | 2.796338879 | 27.31943126 | 20.65230103 | 9.608705417 | Oncofetal suppressor |
| CCDC152    | 2.048485814 | 6.193574842 | 4.431361392 | 3.025911078 | Oncofetal suppressor |

|          |             |             |             |             |                      |
|----------|-------------|-------------|-------------|-------------|----------------------|
| ID2      | 18.01010249 | 71.84987201 | 119.5291348 | 50.53353129 | Oncofetal suppressor |
| MVK      | 1.064246077 | 1.916912832 | 6.243725684 | 0.84831426  | Oncofetal suppressor |
| AOX1     | 3.044162676 | 232.6305242 | 225.1698827 | 9.712398294 | Oncofetal suppressor |
| MAP2K3   | 2.401737001 | 4.169412259 | 6.074451801 | 1.608760749 | Oncofetal suppressor |
| IGSF6    | 0.503947545 | 7.330063705 | 14.60352313 | 4.94984046  | Oncofetal suppressor |
| TTPA     | 0.231195692 | 58.64494264 | 66.20190025 | 9.450045844 | Oncofetal suppressor |
| MPEG1    | 0.062170926 | 14.70868775 | 23.92473013 | 4.387311795 | Oncofetal suppressor |
| FOS      | 7.567402124 | 35.47646664 | 43.29769794 | 2.453830456 | Oncofetal suppressor |
| PON3     | 0.177728827 | 88.27218113 | 68.62890557 | 7.476723193 | Oncofetal suppressor |
| PCYT2    | 1.391225441 | 6.364238127 | 7.493439301 | 3.772379912 | Oncofetal suppressor |
| NNMT     | 16.11661884 | 21.02154248 | 28.27071715 | 1.234100931 | Oncofetal suppressor |
| CMC2     | 1.864988139 | 6.577422151 | 7.547786983 | 3.811807259 | Oncofetal suppressor |
| FOLR2    | 0           | 9.444319431 | 11.24939532 | 1.612882132 | Oncofetal suppressor |
| SLC13A5  | 2.513509915 | 25.1510184  | 29.15214195 | 2.39391781  | Oncofetal suppressor |
| DSG1     | 0.007887374 | 6.602368809 | 6.116756478 | 0.920212085 | Oncofetal suppressor |
| NENF     | 3.104160613 | 11.76414011 | 9.55746724  | 6.851194299 | Oncofetal suppressor |
| PLEK     | 0.083332304 | 5.610707868 | 10.78833902 | 2.140255674 | Oncofetal suppressor |
| IL32     | 23.74399528 | 25.09820936 | 99.53385518 | 19.71185016 | Oncofetal suppressor |
| ST3GAL1  | 12.49852255 | 25.34868391 | 23.56438473 | 6.948229788 | Oncofetal suppressor |
| TYROBP   | 0.759211696 | 61.49066618 | 78.00646773 | 24.71991011 | Oncofetal suppressor |
| SLC35D1  | 5.647565577 | 14.83179169 | 18.93571496 | 6.658641367 | Oncofetal suppressor |
| NCF2     | 0.381988108 | 3.178701692 | 4.896090216 | 1.910415509 | Oncofetal suppressor |
| NGFR     | 0.136417993 | 6.21706467  | 4.877070816 | 0.943515091 | Oncofetal suppressor |
| MIA3     | 12.47315681 | 25.9169038  | 28.78633147 | 12.88285211 | Oncofetal suppressor |
| CYBB     | 0.053072296 | 13.90595097 | 21.14839152 | 4.94744317  | Oncofetal suppressor |
| GRB14    | 0.302300632 | 24.66232209 | 26.03349149 | 8.297285239 | Oncofetal suppressor |
| FIS1     | 10.32342862 | 24.6291828  | 22.50836217 | 9.32386644  | Oncofetal suppressor |
| RARRES3  | 1.626365587 | 21.47892566 | 21.61152992 | 10.79983918 | Oncofetal suppressor |
| ITGAL    | 0.14569764  | 4.220298037 | 5.379610552 | 3.140697442 | Oncofetal suppressor |
| SLC25A42 | 4.241204515 | 10.26274553 | 11.7171079  | 4.63641009  | Oncofetal suppressor |
| PLIN4    | 0.161142413 | 4.221511822 | 7.299685763 | 2.388855137 | Oncofetal suppressor |
| MX1      | 2.079803397 | 2.140187665 | 7.042428753 | 2.182652492 | Oncofetal suppressor |
| FCGRT    | 12.71423449 | 46.42823872 | 48.8991721  | 27.43192264 | Oncofetal suppressor |
| BAAT     | 0.468556717 | 387.721607  | 305.3345829 | 102.1621261 | Oncofetal suppressor |
| SIK1     | 7.977986773 | 2.376884355 | 23.43288437 | 4.945716201 | Oncofetal suppressor |
| SULT1B1  | 1.215449054 | 4.32785853  | 5.638129166 | 0.09378653  | Oncofetal suppressor |
| MT1F     | 2.989697488 | 60.78175251 | 30.01921272 | 0.319809017 | Oncofetal suppressor |
| CLRN3    | 3.464026934 | 16.21202328 | 19.96436248 | 0.369028596 | Oncofetal suppressor |
| ADAMTSL3 | 1.762473098 | 4.285442747 | 3.720811892 | 2.321435706 | Oncofetal suppressor |
| BHMT2    | 0.086789206 | 130.1868261 | 123.2732578 | 71.13944515 | Oncofetal suppressor |
| SFXN2    | 0.804829709 | 10.78726254 | 4.72198348  | 4.745214541 | Oncofetal suppressor |
| GPR137B  | 3.120317597 | 4.481462452 | 5.223631222 | 3.220241314 | Oncofetal suppressor |
| EPHX2    | 7.455111331 | 51.79342573 | 43.33371731 | 10.57462521 | Oncofetal suppressor |
| CDC14B   | 3.169129821 | 5.446625041 | 5.751238322 | 1.024913714 | Oncofetal suppressor |

|         |             |             |             |             |                      |
|---------|-------------|-------------|-------------|-------------|----------------------|
| OLFML1  | 0.156728273 | 5.333585509 | 3.880221899 | 1.146089178 | Oncofetal suppressor |
| TUBE1   | 4.391938519 | 20.94270979 | 17.47100663 | 2.952875646 | Oncofetal suppressor |
| HLA-DRA | 0.366779322 | 158.8581664 | 235.2260813 | 108.1855885 | Oncofetal suppressor |
| GLYATL1 | 0.461964268 | 85.88135068 | 76.37964695 | 2.307399852 | Oncofetal suppressor |
| ACADS   | 2.925369822 | 17.78404688 | 17.69869333 | 2.923593697 | Oncofetal suppressor |
| MYCT1   | 0.478500689 | 5.586137221 | 5.113339009 | 2.879923008 | Oncofetal suppressor |
| GHITM   | 51.03439842 | 82.91649392 | 115.5307645 | 53.47658076 | Oncofetal suppressor |
| MRPS28  | 2.803730602 | 11.14940082 | 10.01192027 | 6.180352597 | Oncofetal suppressor |
| CSTA    | 0           | 4.589161061 | 7.588481729 | 2.085923281 | Oncofetal suppressor |
| HPX     | 51.32331703 | 341.6750078 | 299.8153733 | 28.30894214 | Oncofetal suppressor |
| TM6SF2  | 2.162383723 | 8.061563634 | 8.738771457 | 2.736731812 | Oncofetal suppressor |
| ALB     | 230.7473763 | 38895.13499 | 31228.73251 | 8554.226463 | Oncofetal suppressor |
| OIT3    | 6.21221359  | 19.80763692 | 36.00264868 | 5.03314435  | Oncofetal suppressor |
| LARP1B  | 7.761594653 | 13.34729896 | 12.87099161 | 8.446532781 | Oncofetal suppressor |
| B2M     | 68.24076987 | 356.3532071 | 673.4828196 | 161.3769469 | Oncofetal suppressor |
| SULT1A1 | 1.176196895 | 20.47285365 | 18.9367361  | 5.119187324 | Oncofetal suppressor |
| SDPR    | 0.547366005 | 11.34462942 | 14.25719418 | 2.439121966 | Oncofetal suppressor |
| AIMP2   | 1.134402923 | 3.618590394 | 4.70288303  | 2.70250413  | Oncofetal suppressor |
| GCHFR   | 4.388990899 | 13.42672468 | 8.694475874 | 3.351096204 | Oncofetal suppressor |
| OAF     | 4.218182363 | 44.05841576 | 46.58100586 | 20.65529552 | Oncofetal suppressor |
| SLC27A5 | 0.50296569  | 103.5579556 | 95.35250428 | 15.42827291 | Oncofetal suppressor |
| CLEC2B  | 0.230310523 | 6.751864638 | 9.808117429 | 3.545360399 | Oncofetal suppressor |
| PTPRC   | 0.003246306 | 8.539541518 | 14.31374967 | 3.461292931 | Oncofetal suppressor |
| BIN2    | 0.029057581 | 6.985074077 | 9.444195065 | 2.278913434 | Oncofetal suppressor |
| ENTPD5  | 5.848413464 | 29.35426573 | 31.6901372  | 17.75496109 | Oncofetal suppressor |
| VIPR1   | 0.23019843  | 7.328894694 | 3.506887202 | 0.075815893 | Oncofetal suppressor |
| UGP2    | 42.89974657 | 95.94301427 | 136.8780588 | 53.09564114 | Oncofetal suppressor |
| TRAPPC5 | 5.707142634 | 18.67697513 | 13.40428749 | 5.959113978 | Oncofetal suppressor |
| IFITM2  | 35.32861221 | 50.25710942 | 61.60336951 | 34.0329575  | Oncofetal suppressor |
| AGXT    | 0.579081953 | 166.512397  | 153.6240642 | 100.2775807 | Oncofetal suppressor |
| CNGA1   | 1.727466323 | 12.24778892 | 19.32135742 | 2.867921524 | Oncofetal suppressor |
| ACADVL  | 33.33239446 | 79.0246809  | 83.85742082 | 26.69812814 | Oncofetal suppressor |
| UPB1    | 0.463597474 | 32.40224488 | 33.57594896 | 7.553352613 | Oncofetal suppressor |
| CHDH    | 4.375852265 | 18.8867911  | 14.06895372 | 8.091605063 | Oncofetal suppressor |
| ALDH5A1 | 8.419855244 | 34.88770276 | 39.48982305 | 18.65712962 | Oncofetal suppressor |
| GPLD1   | 0.9782656   | 10.24112152 | 15.70028226 | 6.245079848 | Oncofetal suppressor |
| ARHGEF6 | 1.653445445 | 3.852229965 | 4.406205322 | 1.769121597 | Oncofetal suppressor |
| ALDH9A1 | 6.428225695 | 42.2655655  | 41.2251942  | 19.40546019 | Oncofetal suppressor |
| AKR1A1  | 12.63130554 | 20.41309945 | 25.73001133 | 10.71064753 | Oncofetal suppressor |
| ANXA10  | 0.106685584 | 25.29585583 | 21.81802501 | 1.531166401 | Oncofetal suppressor |
| ACP2    | 3.630389511 | 8.48708798  | 9.248472191 | 4.893681765 | Oncofetal suppressor |
| RBP4    | 447.3315337 | 3576.098989 | 3388.309289 | 1108.645649 | Oncofetal suppressor |
| HSD17B6 | 0.729304369 | 254.3633901 | 297.398987  | 122.4901381 | Oncofetal suppressor |
| GPT2    | 9.238038991 | 16.55659795 | 23.91912592 | 2.468480531 | Oncofetal suppressor |

|               |             |             |             |             |                      |
|---------------|-------------|-------------|-------------|-------------|----------------------|
| CPED1         | 5.130794274 | 9.99229467  | 8.331281869 | 0.900218533 | Oncofetal suppressor |
| CYP7B1        | 0.580886775 | 4.845527429 | 5.089938341 | 1.657028444 | Oncofetal suppressor |
| RNASE6        | 0.312342983 | 8.092879645 | 9.965448401 | 3.669380623 | Oncofetal suppressor |
| NAPEPLD       | 2.49463699  | 6.201063851 | 5.338436882 | 3.604349939 | Oncofetal suppressor |
| CTSL1         | 55.42524151 | 69.78044301 | 108.7696279 | 42.11112597 | Oncofetal suppressor |
| ITGA9         | 1.346283354 | 5.66215447  | 6.412823771 | 1.684123711 | Oncofetal suppressor |
| GAMT          | 6.253813235 | 62.32440306 | 39.47503194 | 9.22309511  | Oncofetal suppressor |
| ISG15         | 4.525037855 | 5.241932024 | 21.60106368 | 2.674904146 | Oncofetal suppressor |
| SULT1A2       | 0.837594047 | 11.38627453 | 7.064725152 | 1.701467277 | Oncofetal suppressor |
| PC            | 2.285440802 | 15.60584291 | 12.54283624 | 3.869437507 | Oncofetal suppressor |
| SLC16A2       | 8.722151346 | 27.99621842 | 25.87670053 | 11.70044861 | Oncofetal suppressor |
| PCK2          | 1.990959725 | 56.66645157 | 55.85201857 | 9.021488256 | Oncofetal suppressor |
| F9            | 0           | 230.4737019 | 261.0229299 | 18.43907761 | Oncofetal suppressor |
| CHP1          | 27.23797118 | 50.3628406  | 60.25490924 | 29.82349896 | Oncofetal suppressor |
| PLA1A         | 0.959422751 | 11.38035145 | 11.69756915 | 4.023803557 | Oncofetal suppressor |
| MST1P9        | 1.408197898 | 10.90032744 | 9.485055444 | 6.131409845 | Oncofetal suppressor |
| SLC22A3       | 8.111575426 | 16.6176141  | 19.84789081 | 11.19906296 | Oncofetal suppressor |
| C8orf40       | 5.328430512 | 22.50618765 | 17.11851039 | 10.11708676 | Oncofetal suppressor |
| MCC           | 3.180275263 | 4.937148197 | 4.934381776 | 1.970825155 | Oncofetal suppressor |
| CERS4         | 4.67475097  | 7.825099237 | 9.692500776 | 2.357697893 | Oncofetal suppressor |
| PHGDH         | 9.190705251 | 19.86970009 | 13.5802223  | 5.579767093 | Oncofetal suppressor |
| ADAP2         | 0.486047328 | 5.990676851 | 5.973551637 | 2.410510326 | Oncofetal suppressor |
| CA5A          | 0.338794444 | 13.21771631 | 11.82230882 | 0.029674783 | Oncofetal suppressor |
| DMGDH         | 0.136896942 | 52.90907227 | 47.9251993  | 9.13761536  | Oncofetal suppressor |
| SHBG          | 0.472464729 | 11.36381663 | 10.53100378 | 0.419835949 | Oncofetal suppressor |
| SCCPDH        | 13.09099886 | 40.48320858 | 37.47109994 | 23.9123267  | Oncofetal suppressor |
| NR0B2         | 0.059723887 | 21.73123495 | 30.24349861 | 14.16811737 | Oncofetal suppressor |
| C5orf4        | 7.741519091 | 21.56063759 | 18.04944395 | 5.951532091 | Oncofetal suppressor |
| PTGR1         | 38.19318519 | 99.26059958 | 95.02059955 | 39.54361774 | Oncofetal suppressor |
| MT1X          | 1.082535036 | 24.52830789 | 18.93529968 | 0.252394658 | Oncofetal suppressor |
| ARHGEF26      | 5.511693302 | 6.669924785 | 10.95307064 | 5.523380512 | Oncofetal suppressor |
| CCDC159       | 2.522395074 | 6.340239253 | 8.048424597 | 3.223486183 | Oncofetal suppressor |
| KDM8          | 0.573066042 | 4.28814519  | 5.443237329 | 1.298931525 | Oncofetal suppressor |
| TAT           | 0.030645081 | 176.4516954 | 220.2104298 | 15.40620121 | Oncofetal suppressor |
| RP11-676J12.7 | 1.24610249  | 5.122697672 | 3.247109275 | 0.873162398 | Oncofetal suppressor |
| CYP1A2        | 0           | 347.4620069 | 138.6538707 | 0.500315973 | Oncofetal suppressor |
| SLC25A20      | 8.472079609 | 36.8496672  | 40.83350659 | 13.332068   | Oncofetal suppressor |
| THNSL1        | 1.133669115 | 7.430892095 | 6.861029641 | 3.874831021 | Oncofetal suppressor |
| ADHFE1        | 3.097914472 | 16.68477162 | 15.56714521 | 2.348965057 | Oncofetal suppressor |
| TRIM55        | 4.843395825 | 5.049166282 | 13.12195846 | 1.482447689 | Oncofetal suppressor |
| AGMAT         | 1.629363202 | 31.16689442 | 29.48186984 | 8.708266884 | Oncofetal suppressor |
| ASS1          | 9.377059162 | 517.7135084 | 386.6372457 | 30.08834363 | Oncofetal suppressor |
| HAO2          | 1.633144446 | 139.9918803 | 74.33027834 | 6.472833798 | Oncofetal suppressor |
| HAAO          | 4.011762611 | 59.61336481 | 40.03980903 | 13.22295707 | Oncofetal suppressor |

|           |             |             |             |             |                      |
|-----------|-------------|-------------|-------------|-------------|----------------------|
| HSD17B13  | 0.887132691 | 322.1493248 | 279.8857691 | 17.90356295 | Oncofetal suppressor |
| GFRA1     | 0.019457904 | 6.806403439 | 4.981397153 | 0.099093166 | Oncofetal suppressor |
| SMPD1     | 6.538335398 | 10.54964618 | 12.83260782 | 4.351554983 | Oncofetal suppressor |
| CAT       | 11.80727867 | 220.9851174 | 237.8280507 | 114.8755095 | Oncofetal suppressor |
| RARRES2   | 1.331167329 | 182.6707646 | 191.4360125 | 64.47762847 | Oncofetal suppressor |
| IFI44     | 0.059156713 | 5.756136231 | 11.87560716 | 2.228691688 | Oncofetal suppressor |
| DNAJC25   | 9.968178425 | 18.2323486  | 19.7879345  | 8.828147032 | Oncofetal suppressor |
| USE1      | 4.161582531 | 12.03136869 | 9.825448138 | 4.831507003 | Oncofetal suppressor |
| TNFAIP8L1 | 5.802217873 | 16.50418743 | 15.55246981 | 8.017631809 | Oncofetal suppressor |
| ODZ1      | 0.517163663 | 4.632070013 | 5.054012259 | 0.215142177 | Oncofetal suppressor |
| DECR1     | 7.012357518 | 74.89056512 | 72.01708702 | 22.67464814 | Oncofetal suppressor |
| ANGPTL3   | 8.556812225 | 340.312937  | 421.4138237 | 74.02267811 | Oncofetal suppressor |
| UCP2      | 1.151746659 | 4.573709761 | 7.748762021 | 3.373152853 | Oncofetal suppressor |
| NKG7      | 0.183885944 | 4.013545949 | 5.489331836 | 0.514674264 | Oncofetal suppressor |
| ALDH4A1   | 0.067411698 | 11.51031648 | 16.43191504 | 3.537971385 | Oncofetal suppressor |
| MS4A4A    | 0.060562117 | 3.973747248 | 8.008568001 | 1.115170776 | Oncofetal suppressor |
| MS4A6A    | 0.004456402 | 17.91307921 | 21.73852227 | 3.047332541 | Oncofetal suppressor |
| C21orf33  | 6.556363673 | 15.39969542 | 18.43389578 | 9.055814659 | Oncofetal suppressor |
| PLIN1     | 0.64731445  | 7.52173926  | 7.97793926  | 1.61461456  | Oncofetal suppressor |
| LDHD      | 0.585339666 | 22.65996099 | 19.23716397 | 1.517577716 | Oncofetal suppressor |
| PDE3B     | 2.163503093 | 5.996186733 | 8.182661601 | 3.740888151 | Oncofetal suppressor |
| IGF1      | 1.135455449 | 41.37598377 | 23.69632174 | 2.871896665 | Oncofetal suppressor |
| DDT       | 0.614396288 | 9.056384915 | 8.188845733 | 3.522784403 | Oncofetal suppressor |
| NPC1L1    | 0.504791935 | 4.598918416 | 7.413582326 | 0.741281958 | Oncofetal suppressor |
| CYP2B6    | 0.084440004 | 192.5118171 | 175.9660806 | 4.659313431 | Oncofetal suppressor |
| GLYCTK    | 1.72854113  | 17.23597701 | 14.11354632 | 7.151715592 | Oncofetal suppressor |
| MACROD1   | 2.280428981 | 9.817554235 | 7.139580984 | 2.002912908 | Oncofetal suppressor |
| CNDP2     | 4.534586142 | 13.83125735 | 17.27888511 | 8.40963102  | Oncofetal suppressor |
| RBP1      | 1.61242566  | 6.095638544 | 7.752353637 | 2.102828841 | Oncofetal suppressor |
| SLC7A2    | 20.07904245 | 51.78676252 | 65.63763107 | 17.59413947 | Oncofetal suppressor |
| CDH5      | 0.44938493  | 4.093376003 | 5.240339175 | 3.055372616 | Oncofetal suppressor |
| ADH4      | 1.22714206  | 1334.342295 | 1619.559084 | 74.93227502 | Oncofetal suppressor |
| GDF2      | 0.042793893 | 10.95504794 | 8.112425511 | 0.161801142 | Oncofetal suppressor |
| TMPRSS6   | 4.09644416  | 17.55955208 | 20.73133632 | 7.372387988 | Oncofetal suppressor |
| CYP4A11   | 0.042595875 | 318.0419581 | 237.1030942 | 36.35183813 | Oncofetal suppressor |
| ISOC2     | 5.086596696 | 19.78166579 | 23.48312002 | 13.23363438 | Oncofetal suppressor |
| CYP26A1   | 0.333396283 | 22.7870818  | 12.46178671 | 0.036015753 | Oncofetal suppressor |
| MBL2      | 1.01752502  | 15.4967944  | 63.51642208 | 0.827534831 | Oncofetal suppressor |
| CRYL1     | 17.65813882 | 64.31107131 | 75.38080178 | 23.21336447 | Oncofetal suppressor |
| UROD      | 7.165239874 | 13.92103489 | 16.38167697 | 8.548276389 | Oncofetal suppressor |
| ZNHIT1    | 4.029677979 | 12.46311637 | 11.0198787  | 4.243493981 | Oncofetal suppressor |
| DCXR      | 5.190765693 | 204.2018341 | 213.5370594 | 25.45690739 | Oncofetal suppressor |
| ZEB2      | 2.49468987  | 4.363510598 | 4.108012806 | 2.615484081 | Oncofetal suppressor |
| METTL7B   | 5.116171847 | 45.77653204 | 38.46071788 | 8.364544999 | Oncofetal suppressor |



|           |             |             |             |             |                      |
|-----------|-------------|-------------|-------------|-------------|----------------------|
| C20orf3   | 17.72441426 | 34.31033535 | 46.49844527 | 22.91272956 | Oncofetal suppressor |
| CYP3A43   | 0.021001008 | 17.01321493 | 13.38871172 | 1.752549813 | Oncofetal suppressor |
| CYP4A22   | 0.037611611 | 249.8080765 | 133.1098012 | 20.59211704 | Oncofetal suppressor |
| F12       | 0.099733931 | 39.3308219  | 38.03139413 | 9.284445512 | Oncofetal suppressor |
| NR1I3     | 0.250677689 | 24.8216288  | 21.54202733 | 1.692495192 | Oncofetal suppressor |
| NPL       | 0.244244888 | 6.361553635 | 7.283400189 | 1.956388362 | Oncofetal suppressor |
| ACSM5     | 0           | 71.55753182 | 39.29478756 | 2.647937129 | Oncofetal suppressor |
| C6        | 1.4364685   | 189.5097588 | 173.0105453 | 24.02256033 | Oncofetal suppressor |
| FPGS      | 2.225028202 | 5.127421573 | 4.99553481  | 3.295296518 | Oncofetal suppressor |
| PROS1     | 44.82270043 | 98.53546142 | 107.6911914 | 41.06847808 | Oncofetal suppressor |
| GPX3      | 47.61043599 | 83.429072   | 129.9801011 | 31.16119863 | Oncofetal suppressor |
| TFR2      | 0.114500066 | 86.40188217 | 75.28822628 | 15.70873457 | Oncofetal suppressor |
| SOWAHB    | 2.500690887 | 5.265886031 | 5.581575738 | 2.520131715 | Oncofetal suppressor |
| SURF1     | 2.273916633 | 7.518548882 | 9.389730687 | 3.252666286 | Oncofetal suppressor |
| HTATIP2   | 4.551707556 | 8.664956906 | 14.14831968 | 7.215608642 | Oncofetal suppressor |
| PBLD      | 7.587653775 | 93.81040805 | 97.16745032 | 31.28482516 | Oncofetal suppressor |
| FBXO8     | 3.921321657 | 5.781667259 | 10.02485746 | 3.455749935 | Oncofetal suppressor |
| SERPINA10 | 1.362856153 | 106.3197815 | 120.1656908 | 68.3398221  | Oncofetal suppressor |
| APRT      | 4.541453409 | 6.909427411 | 7.951054993 | 2.779784894 | Oncofetal suppressor |
| PPAP2B    | 9.035647913 | 26.74601298 | 23.34602609 | 13.64667262 | Oncofetal suppressor |
| C8B       | 10.72169176 | 231.9513294 | 226.0536492 | 144.2267748 | Oncofetal suppressor |
| OTC       | 0.496571152 | 96.99316469 | 137.0329697 | 27.10384225 | Oncofetal suppressor |
| SKAP1     | 0.146007763 | 9.393584884 | 11.3595154  | 1.875831794 | Oncofetal suppressor |
| SLC46A3   | 2.376934791 | 17.0084916  | 27.55177405 | 1.499158096 | Oncofetal suppressor |
| CXCL9     | 0           | 13.1062464  | 54.00324354 | 4.662774839 | Oncofetal suppressor |
| CLEC4M    | 0.0070378   | 24.01261334 | 13.35464774 | 0           | Oncofetal suppressor |
| SDS       | 0           | 23.08020231 | 59.52152504 | 1.1365761   | Oncofetal suppressor |
| SULT1E1   | 13.73025209 | 45.28463173 | 20.65105616 | 1.534382056 | Oncofetal suppressor |
| PEMT      | 0.503702434 | 11.55753212 | 10.54811537 | 0.805318189 | Oncofetal suppressor |
| SLCO1B3   | 0.04066661  | 15.10575259 | 12.20171726 | 0.293538028 | Oncofetal suppressor |
| HGFAC     | 0.019475547 | 29.11525223 | 19.35564795 | 0.205128508 | Oncofetal suppressor |
| HGF       | 0.903265225 | 4.712122734 | 6.67291474  | 0.958164958 | Oncofetal suppressor |
| SAMSN1    | 0.205895827 | 2.652297497 | 5.380644963 | 1.597184946 | Oncofetal suppressor |
| MS4A7     | 0.031757504 | 13.51122253 | 19.25004205 | 2.686209412 | Oncofetal suppressor |
| CPEB3     | 1.898680121 | 4.574299274 | 8.407821581 | 2.148398698 | Oncofetal suppressor |
| ST3GAL6   | 5.676542724 | 10.61326257 | 9.325021402 | 1.377074166 | Oncofetal suppressor |
| AKR7A3    | 0.371447652 | 34.11401804 | 44.58025923 | 1.007519623 | Oncofetal suppressor |
| CD14      | 0.051249809 | 75.62857369 | 75.7147314  | 12.62289119 | Oncofetal suppressor |
| CA14      | 2.307426244 | 4.656636865 | 3.356435294 | 0.58974134  | Oncofetal suppressor |
| IGJ       | 0           | 24.03536505 | 86.43439619 | 11.05420997 | Oncofetal suppressor |
| ACOX2     | 1.399064946 | 47.31875578 | 41.2637541  | 10.11764767 | Oncofetal suppressor |
| HADHB     | 9.929315176 | 38.68641314 | 44.11619761 | 21.93627744 | Oncofetal suppressor |
| GLS2      | 0.448714298 | 50.38313442 | 42.49806814 | 2.792717067 | Oncofetal suppressor |
| ALDH3A2   | 11.13630461 | 41.71478361 | 53.51064748 | 27.4073816  | Oncofetal suppressor |

|          |             |             |             |             |                      |
|----------|-------------|-------------|-------------|-------------|----------------------|
| PRKAG2   | 4.142243553 | 5.28019647  | 7.80725498  | 2.221845896 | Oncofetal suppressor |
| CD52     | 0.103376619 | 4.889042069 | 5.200206623 | 0.765768092 | Oncofetal suppressor |
| ALDH1B1  | 2.382425989 | 44.5203202  | 82.69665345 | 24.96547437 | Oncofetal suppressor |
| TEF      | 1.634136755 | 4.851932748 | 5.864029731 | 3.435704217 | Oncofetal suppressor |
| TMEM176B | 5.572613211 | 227.0451024 | 182.6984874 | 45.95657418 | Oncofetal suppressor |
| CD82     | 2.554544165 | 3.911014188 | 4.259621017 | 2.152483156 | Oncofetal suppressor |
| PHLPP1   | 4.602050447 | 8.833385179 | 6.708779958 | 3.976291254 | Oncofetal suppressor |
| NT5DC1   | 7.755269476 | 11.01842666 | 12.47199072 | 6.858025297 | Oncofetal suppressor |
| AMT      | 2.36140472  | 7.345305974 | 6.142401691 | 4.204163995 | Oncofetal suppressor |
| C1QC     | 0           | 71.01277105 | 115.05832   | 14.93328444 | Oncofetal suppressor |
| MAOB     | 5.047902111 | 107.1351869 | 101.0584651 | 67.32243121 | Oncofetal suppressor |
| ALAD     | 7.892286432 | 67.67227978 | 57.72277648 | 29.0569277  | Oncofetal suppressor |
| DHODH    | 1.024724507 | 7.616656077 | 7.351745789 | 1.909536505 | Oncofetal suppressor |
| TSKU     | 9.395968391 | 16.94751913 | 17.31873634 | 1.781966773 | Oncofetal suppressor |
| PALM3    | 3.623115264 | 34.0757618  | 43.6344104  | 9.276626061 | Oncofetal suppressor |
| C1QA     | 0           | 58.22851805 | 78.54284077 | 12.36593936 | Oncofetal suppressor |
| LILRB5   | 0.01825571  | 5.482148534 | 7.021369556 | 0.48070108  | Oncofetal suppressor |
| GCDH     | 1.603662941 | 40.86154222 | 28.74276463 | 4.76968801  | Oncofetal suppressor |
| IGFBP1   | 0.334135819 | 486.5286717 | 316.0175787 | 78.45387915 | Oncofetal suppressor |
| AGXT2    | 4.898189693 | 20.62283354 | 15.85991244 | 11.96564666 | Oncofetal suppressor |
| CCDC53   | 4.329362243 | 8.306375852 | 9.836953276 | 4.185025617 | Oncofetal suppressor |
| C1orf162 | 0.553723288 | 7.773786614 | 8.971067643 | 1.269090127 | Oncofetal suppressor |
| CD53     | 0.006625798 | 9.406361048 | 13.88753654 | 3.210202086 | Oncofetal suppressor |
| CFHR3    | 0           | 93.13251615 | 119.1274676 | 2.818691263 | Oncofetal suppressor |
| GPX1     | 24.67058407 | 49.63571563 | 66.3186362  | 16.42387833 | Oncofetal suppressor |
| GNMT     | 6.208520927 | 233.2264779 | 75.12583802 | 14.83999362 | Oncofetal suppressor |
| CYP2E1   | 0.173660502 | 902.6734601 | 911.3939977 | 4.274488877 | Oncofetal suppressor |
| COX6A1   | 5.095869577 | 10.81652711 | 9.589784855 | 4.52823059  | Oncofetal suppressor |
| IDH1     | 29.57889211 | 89.08620843 | 103.4566581 | 42.88224269 | Oncofetal suppressor |
| FAS      | 1.310263616 | 6.156559816 | 10.1130481  | 2.487483277 | Oncofetal suppressor |
| MFSD2A   | 0.245894044 | 6.936049561 | 25.71137191 | 0.112238708 | Oncofetal suppressor |
| IFIT1    | 1.668280784 | 15.1207483  | 23.72480169 | 7.419505346 | Oncofetal suppressor |
| BTD      | 3.597429004 | 10.25114436 | 10.08998017 | 2.953906742 | Oncofetal suppressor |
| F2       | 12.60604032 | 331.2443456 | 284.641839  | 70.32702484 | Oncofetal suppressor |
| GLUD1    | 39.17170374 | 127.2494394 | 172.9933538 | 65.01856244 | Oncofetal suppressor |
| FGL1     | 1.047385877 | 194.0014652 | 163.1049498 | 65.20128765 | Oncofetal suppressor |
| APOA5    | 1.823988472 | 148.0698975 | 92.99749909 | 7.388990363 | Oncofetal suppressor |
| PNPO     | 0.714298526 | 10.32800534 | 11.55237227 | 6.960349505 | Oncofetal suppressor |
| APOC3    | 203.1521955 | 3717.906921 | 2229.240451 | 547.3813229 | Oncofetal suppressor |
| DHRS4L2  | 1.765275111 | 11.70053333 | 12.63910666 | 4.379351723 | Oncofetal suppressor |
| ACSM2A   | 0.921667482 | 147.5081251 | 155.5325461 | 46.42324514 | Oncofetal suppressor |
| ABCC2    | 2.047294987 | 33.69535014 | 37.88603757 | 7.604267922 | Oncofetal suppressor |
| CYB5A    | 4.80308654  | 48.48356605 | 48.93818868 | 20.35300541 | Oncofetal suppressor |
| COQ5     | 6.545605478 | 9.597817372 | 11.05815601 | 6.092539947 | Oncofetal suppressor |

|          |             |             |             |             |                      |
|----------|-------------|-------------|-------------|-------------|----------------------|
| SPI1     | 0.013347668 | 4.150094395 | 6.649067003 | 2.173674275 | Oncofetal suppressor |
| IL33     | 0.341786206 | 11.70362007 | 15.3841936  | 2.305322984 | Oncofetal suppressor |
| GPD1     | 4.778018723 | 21.88109015 | 30.24935351 | 1.715531108 | Oncofetal suppressor |
| HSD11B1  | 0           | 206.5195695 | 163.6232346 | 10.65954767 | Oncofetal suppressor |
| PEBP1    | 41.82787271 | 405.7514571 | 325.7287887 | 114.9033275 | Oncofetal suppressor |
| NIT2     | 6.272167917 | 14.16682113 | 17.17644644 | 3.653026358 | Oncofetal suppressor |
| ASPG     | 0.091915153 | 9.239577187 | 7.554304435 | 0.656688135 | Oncofetal suppressor |
| ACAA1    | 13.26491221 | 41.44600286 | 43.10072265 | 5.843817663 | Oncofetal suppressor |
| EGR1     | 9.76428078  | 49.3914058  | 59.58027563 | 6.132031976 | Oncofetal suppressor |
| CFHR1    | 0.006250866 | 534.057795  | 511.1055367 | 181.3684591 | Oncofetal suppressor |
| TFB2M    | 5.865480379 | 6.484902165 | 11.40124666 | 4.225541379 | Oncofetal suppressor |
| SDHD     | 14.11342314 | 51.36186412 | 52.71024292 | 24.89010816 | Oncofetal suppressor |
| GMFG     | 0.555746487 | 22.79060922 | 28.4040108  | 10.66785484 | Oncofetal suppressor |
| KIAA0922 | 3.406143066 | 7.208381916 | 9.844891235 | 5.078338046 | Oncofetal suppressor |
| CYP2C9   | 0.022740716 | 666.8888131 | 685.3585523 | 65.28190327 | Oncofetal suppressor |
| PAH      | 0.354203533 | 205.2233993 | 210.127046  | 41.94219692 | Oncofetal suppressor |
| CD5L     | 0           | 22.05844513 | 37.33972559 | 0.300638417 | Oncofetal suppressor |
| COLEC10  | 0.388612963 | 27.42210077 | 23.99670959 | 0.602913407 | Oncofetal suppressor |
| PON1     | 0.055454469 | 177.382332  | 197.3415968 | 9.652309145 | Oncofetal suppressor |
| ARSA     | 1.440530574 | 4.048477468 | 4.498876646 | 2.084855268 | Oncofetal suppressor |
| HLA-A    | 4.030353032 | 40.59740685 | 84.88831699 | 35.01530233 | Oncofetal suppressor |
| SRGN     | 0.067908997 | 22.48157869 | 62.12169809 | 9.335054344 | Oncofetal suppressor |
| MAFB     | 1.058096761 | 9.667503252 | 14.7849942  | 5.512915257 | Oncofetal suppressor |
| BDH2     | 4.775510017 | 9.647386535 | 8.709008401 | 3.035775045 | Oncofetal suppressor |
| LDLR     | 6.077523812 | 3.695110326 | 18.76693336 | 3.067183734 | Oncofetal suppressor |
| RBP5     | 2.057607886 | 65.41364809 | 43.67669804 | 11.09750182 | Oncofetal suppressor |
| ANG      | 8.082120421 | 181.5628612 | 151.171086  | 24.39321123 | Oncofetal suppressor |
| CMBL     | 6.293431567 | 72.10649339 | 64.53529874 | 42.91866377 | Oncofetal suppressor |
| FBP1     | 10.7369227  | 377.2714361 | 451.0012238 | 55.49429947 | Oncofetal suppressor |
| RGS1     | 0.211298094 | 2.220672497 | 9.523015842 | 2.43475937  | Oncofetal suppressor |
| CCL4     | 0           | 4.84681261  | 25.4269759  | 0.939271395 | Oncofetal suppressor |
| MRPL23   | 2.176816241 | 5.031875087 | 3.910767634 | 1.902796965 | Oncofetal suppressor |
| NR1H4    | 0.027935589 | 32.72578189 | 42.59828172 | 20.71284421 | Oncofetal suppressor |
| TTR      | 808.9448762 | 2257.76434  | 1640.025482 | 155.8128244 | Oncofetal suppressor |
| ARSD     | 1.453490813 | 7.07073159  | 6.186289743 | 2.33932689  | Oncofetal suppressor |
| PNPLA4   | 2.94140752  | 4.70349064  | 4.715665522 | 2.165301914 | Oncofetal suppressor |
| KCND3    | 7.630226001 | 11.78175882 | 11.25323647 | 0.125205469 | Oncofetal suppressor |
| HPD      | 8.707409045 | 524.6610341 | 680.3442606 | 3.115602192 | Oncofetal suppressor |
| GRINA    | 22.19578828 | 37.34453241 | 37.26792698 | 19.2403684  | Oncofetal suppressor |
| HLA-DPA1 | 1.282804262 | 14.73054303 | 6.669799485 | 5.286179539 | Oncofetal suppressor |
| TTC36    | 0.191589968 | 36.26424768 | 23.09975843 | 0.199576886 | Oncofetal suppressor |
| CTSZ     | 16.7893166  | 90.1144414  | 139.1792103 | 49.70100993 | Oncofetal suppressor |
| GIMAP7   | 0.01099376  | 25.54231312 | 20.90740615 | 6.252826466 | Oncofetal suppressor |
| LY86     | 0           | 2.766737701 | 5.876312801 | 0.911025507 | Oncofetal suppressor |

|          |             |             |             |             |                      |
|----------|-------------|-------------|-------------|-------------|----------------------|
| MYO1B    | 23.32328693 | 42.18966324 | 42.69803744 | 25.65103574 | Oncofetal suppressor |
| FOSB     | 1.111128469 | 5.140950676 | 52.63936586 | 1.013512842 | Oncofetal suppressor |
| CYP3A4   | 0.690408136 | 1416.175438 | 427.0250361 | 21.72218851 | Oncofetal suppressor |
| AZGP1    | 0.3683541   | 562.3261255 | 482.6606824 | 207.7398197 | Oncofetal suppressor |
| HMGCL    | 4.488426753 | 21.77366055 | 20.25930466 | 5.382449921 | Oncofetal suppressor |
| C5       | 24.1695712  | 130.1536379 | 141.4047374 | 75.71106911 | Oncofetal suppressor |
| APLNR    | 1.312015462 | 6.990998924 | 6.159457709 | 1.244484066 | Oncofetal suppressor |
| CCL5     | 0.138173743 | 22.83030941 | 29.35995074 | 1.86580941  | Oncofetal suppressor |
| CCL16    | 0.146118124 | 60.97021323 | 55.67562385 | 16.57391588 | Oncofetal suppressor |
| MRPL54   | 4.706319128 | 13.07642784 | 14.48632306 | 5.287931844 | Oncofetal suppressor |
| CLEC4G   | 0           | 20.66699452 | 24.14996619 | 0           | Oncofetal suppressor |
| SLC25A11 | 3.662862199 | 5.871086698 | 6.339904117 | 2.439513996 | Oncofetal suppressor |
| GPX2     | 1.825386117 | 5.224641904 | 26.01386629 | 2.767031159 | Oncofetal suppressor |
| HPR      | 3.324622939 | 115.8534717 | 152.8214278 | 8.080842804 | Oncofetal suppressor |
| POLRMT   | 3.07413307  | 4.69263425  | 4.767752097 | 2.767407797 | Oncofetal suppressor |
| GSS      | 3.308020059 | 6.217224727 | 6.85470486  | 4.263238879 | Oncofetal suppressor |
| PFKFB1   | 0.09393308  | 11.08604917 | 12.65668782 | 2.239653065 | Oncofetal suppressor |
| HLA-DPB1 | 6.52775827  | 30.41919801 | 16.55059217 | 14.7601666  | Oncofetal suppressor |
| FBXO31   | 3.497696454 | 6.323692662 | 6.00328433  | 1.414411517 | Oncofetal suppressor |
| LCP2     | 0.070654408 | 5.504474995 | 8.880074846 | 2.175283484 | Oncofetal suppressor |
| CXCL2    | 14.6788625  | 22.01667427 | 24.39904055 | 0.705442205 | Oncofetal suppressor |
| DAK      | 0.807852195 | 12.0090233  | 12.68271195 | 6.649733729 | Oncofetal suppressor |
| HBA2     | 0           | 26.2442035  | 10.70659846 | 0.365942769 | Oncofetal suppressor |
| UGT2B7   | 3.45968132  | 496.1950017 | 411.6227797 | 35.86502953 | Oncofetal suppressor |
| ESRP2    | 3.398054066 | 7.325194235 | 7.682389828 | 4.207087295 | Oncofetal suppressor |
| CPS1     | 8.971868274 | 300.2113055 | 413.2042483 | 1.816719543 | Oncofetal suppressor |
| NUGGC    | 1.34679918  | 12.32989531 | 9.99157866  | 2.154234089 | Oncofetal suppressor |
| RPS17    | 2.269388736 | 31.55883496 | 4.657970762 | 2.844501029 | Oncofetal suppressor |
| DDX58    | 2.73784815  | 5.442391686 | 6.912755872 | 3.973933363 | Oncofetal suppressor |
| CYP2J2   | 0.480283921 | 73.51553228 | 67.88537505 | 6.143712264 | Oncofetal suppressor |
| C10orf57 | 5.590554535 | 10.39871151 | 12.30695318 | 5.720656347 | Oncofetal suppressor |
| DMRTA1   | 0.377894983 | 5.662142582 | 5.12953235  | 3.129748582 | Oncofetal suppressor |
| GIMAP8   | 0.316822089 | 7.726634826 | 8.697244569 | 2.775457496 | Oncofetal suppressor |
| CD81     | 9.945922962 | 30.49022373 | 29.79223462 | 7.035370995 | Oncofetal suppressor |
| AGTR1    | 0.686835006 | 16.08579284 | 14.22394661 | 5.127287175 | Oncofetal suppressor |
| DNAJC16  | 3.813652324 | 10.28239216 | 10.33331757 | 6.064682861 | Oncofetal suppressor |
| SEPP1    | 104.986219  | 178.5587397 | 189.1992663 | 80.48707901 | Oncofetal suppressor |
| HSD17B4  | 25.66640428 | 72.97801058 | 90.87227061 | 46.80702451 | Oncofetal suppressor |
| TGFBR2   | 12.09975484 | 19.32617045 | 19.73740151 | 11.8866053  | Oncofetal suppressor |
| HRG      | 0.403795314 | 863.6926902 | 881.1460408 | 540.1912727 | Oncofetal suppressor |
| LIPC     | 1.701495011 | 47.21163135 | 32.17983434 | 14.61944467 | Oncofetal suppressor |
| PCTP     | 3.53892878  | 10.48121914 | 12.31167589 | 4.376021158 | Oncofetal suppressor |
| HOGA1    | 0.029959852 | 6.120779573 | 4.925937334 | 1.877151804 | Oncofetal suppressor |
| WAS      | 0.284166306 | 4.695943304 | 5.899343087 | 1.67270558  | Oncofetal suppressor |

|          |             |             |             |             |                      |
|----------|-------------|-------------|-------------|-------------|----------------------|
| RAB26    | 0.28259081  | 3.536536475 | 5.566888497 | 1.634113617 | Oncofetal suppressor |
| UQCRQ    | 5.815938105 | 18.53490989 | 26.54293159 | 14.77465518 | Oncofetal suppressor |
| GBP1     | 1.966667407 | 17.69559321 | 38.29122466 | 12.0748547  | Oncofetal suppressor |
| GSTA2    | 124.7291445 | 646.2455828 | 87.3061283  | 119.6699054 | Oncofetal suppressor |
| ARMC6    | 0.762510846 | 5.043232559 | 5.984305722 | 1.89497476  | Oncofetal suppressor |
| FCGR2B   | 0.019737225 | 4.812274219 | 4.72156127  | 0.25585805  | Oncofetal suppressor |
| NAT1     | 1.344696591 | 4.704899436 | 5.083559084 | 2.58089248  | Oncofetal suppressor |
| HP       | 15.01142723 | 2388.579536 | 1731.592753 | 211.9705717 | Oncofetal suppressor |
| CTSO     | 3.145867811 | 30.82411796 | 39.26159214 | 22.04151271 | Oncofetal suppressor |
| CES2     | 4.796546887 | 75.44338964 | 76.43738233 | 22.58835824 | Oncofetal suppressor |
| RPP25L   | 1.315063117 | 5.61922001  | 3.410093923 | 2.78660344  | Oncofetal suppressor |
| LCAT     | 3.640094707 | 36.31117342 | 27.10773771 | 3.077065869 | Oncofetal suppressor |
| ADH1B    | 0           | 669.6645923 | 656.4536399 | 134.2763291 | Oncofetal suppressor |
| UGT2B10  | 0.700776772 | 324.6718563 | 410.6183762 | 23.92746453 | Oncofetal suppressor |
| IVD      | 3.085938045 | 22.86212913 | 18.85533222 | 7.131861179 | Oncofetal suppressor |
| PPIF     | 15.51740052 | 26.15872394 | 46.54760167 | 16.25811895 | Oncofetal suppressor |
| NQO2     | 3.134292522 | 13.3134576  | 27.76051123 | 5.778653514 | Oncofetal suppressor |
| DNAJC12  | 0.06308698  | 14.45267203 | 10.0604244  | 1.507838264 | Oncofetal suppressor |
| CD83     | 0.39675417  | 1.999958146 | 8.393969543 | 1.946814685 | Oncofetal suppressor |
| AIG1     | 8.307946162 | 45.71316827 | 46.48910341 | 28.91632745 | Oncofetal suppressor |
| NDUFB7   | 18.73418011 | 55.37938632 | 44.58044693 | 19.72786162 | Oncofetal suppressor |
| FCN1     | 0           | 3.074274698 | 8.011834299 | 0.434968632 | Oncofetal suppressor |
| RABEPK   | 2.679619935 | 4.86173546  | 4.566893864 | 1.052621532 | Oncofetal suppressor |
| SLC22A1  | 0.071668665 | 218.060474  | 169.3685994 | 16.0746195  | Oncofetal suppressor |
| G0S2     | 15.68964448 | 20.32968425 | 49.48371953 | 3.901377313 | Oncofetal suppressor |
| BTN3A2   | 2.651215778 | 5.274468557 | 12.78382315 | 4.713844508 | Oncofetal suppressor |
| ABCB4    | 0.047906623 | 21.80022209 | 46.34625143 | 7.305991784 | Oncofetal suppressor |
| AFM      | 0.124566195 | 375.2397452 | 519.5655033 | 163.2945623 | Oncofetal suppressor |
| SLC25A15 | 2.837420319 | 13.29333793 | 28.17320725 | 8.783676204 | Oncofetal suppressor |
| DCN      | 1.645089782 | 44.62410942 | 45.8096208  | 5.713418189 | Oncofetal suppressor |
| RTP3     | 0.041811242 | 19.76509229 | 26.62658818 | 1.490523245 | Oncofetal suppressor |
| KCNN2    | 1.503389958 | 6.528805251 | 2.233193975 | 0.268848587 | Oncofetal suppressor |
| CTBS     | 5.157897233 | 6.380637009 | 10.45865618 | 5.149337534 | Oncofetal suppressor |
| SC5DL    | 29.58856573 | 37.97873268 | 61.66171349 | 23.83401165 | Oncofetal suppressor |
| FYB      | 0.15392706  | 12.73618565 | 20.11363942 | 3.807381693 | Oncofetal suppressor |
| CYP8B1   | 1.212942526 | 71.6614163  | 65.30048589 | 3.171070028 | Oncofetal suppressor |
| IDNK     | 1.344096121 | 14.15453736 | 13.72778922 | 5.175502534 | Oncofetal suppressor |
| RHOB     | 26.91599598 | 43.53227438 | 124.7042398 | 22.95165118 | Oncofetal suppressor |
| DGCR6L   | 5.647706072 | 26.55091749 | 29.9113629  | 12.54461597 | Oncofetal suppressor |
| ABCA9    | 0.023393092 | 8.983955688 | 8.139219461 | 1.849824224 | Oncofetal suppressor |
| HS3ST3B1 | 4.301704505 | 16.46684997 | 11.46089114 | 5.411304789 | Oncofetal suppressor |
| ISOC1    | 6.399578921 | 19.880127   | 28.29461615 | 13.8190623  | Oncofetal suppressor |
| GAS2     | 0.383451388 | 5.823194465 | 7.588736582 | 1.312434342 | Oncofetal suppressor |
| CYB5D2   | 3.272773589 | 7.466950555 | 5.523701395 | 3.197816793 | Oncofetal suppressor |

|               |             |             |             |             |                      |
|---------------|-------------|-------------|-------------|-------------|----------------------|
| ARG1          | 0.351352741 | 305.78771   | 329.6939716 | 75.02670121 | Oncofetal suppressor |
| CP            | 0.380405799 | 247.5322797 | 336.6870553 | 96.83473914 | Oncofetal suppressor |
| DBH           | 0.494576017 | 8.693911761 | 5.375072874 | 2.08852927  | Oncofetal suppressor |
| GCGR          | 0.515516103 | 11.98878798 | 10.64437469 | 4.356214207 | Oncofetal suppressor |
| STAB2         | 0.01932667  | 5.804032641 | 6.315140934 | 0.07949698  | Oncofetal suppressor |
| PGM1          | 21.86292432 | 52.03193623 | 57.03066517 | 17.75367301 | Oncofetal suppressor |
| C4BPB         | 2.136211568 | 43.37017034 | 71.37555849 | 31.59856451 | Oncofetal suppressor |
| SEC14L2       | 2.42858447  | 29.96683626 | 29.16445073 | 3.185505378 | Oncofetal suppressor |
| NR4A2         | 0.233210714 | 1.982821289 | 7.777104481 | 0.953198616 | Oncofetal suppressor |
| ALPL          | 0.45355279  | 8.949740816 | 10.1081238  | 2.843245922 | Oncofetal suppressor |
| CD86          | 0           | 2.869565797 | 5.467689138 | 1.050245078 | Oncofetal suppressor |
| LYRM1         | 6.53322478  | 20.36772942 | 19.52532752 | 11.82569425 | Oncofetal suppressor |
| RP11-115C10.1 | 0.568237149 | 27.2007682  | 17.58729819 | 8.379035253 | Oncofetal suppressor |
| AGXT2L1       | 0.065530264 | 20.8494987  | 69.59725285 | 1.797567589 | Oncofetal suppressor |
| APOL1         | 1.086917043 | 50.100074   | 55.37755501 | 29.1717875  | Oncofetal suppressor |
| PMPCA         | 5.036137147 | 6.752719905 | 9.753099511 | 5.27377982  | Oncofetal suppressor |
| CUX2          | 0.019852279 | 18.45702453 | 8.344690535 | 4.000615325 | Oncofetal suppressor |
| ABHD6         | 3.401063207 | 11.44021289 | 16.06882522 | 2.31914755  | Oncofetal suppressor |
| DNASE1L3      | 0.06579493  | 47.42263631 | 45.87020968 | 0.646793382 | Oncofetal suppressor |
| C4orf34       | 14.78705126 | 32.85897196 | 30.93447678 | 17.65822348 | Oncofetal suppressor |
| SERPINA6      | 0.618832347 | 169.3328943 | 192.6628842 | 78.83125353 | Oncofetal suppressor |
| SQSTM1        | 6.695085163 | 11.75720872 | 15.27390795 | 8.892693046 | Oncofetal suppressor |
| HACL1         | 4.086924894 | 11.55796785 | 12.66156398 | 6.275854734 | Oncofetal suppressor |
| PIK3C2G       | 0.321716437 | 6.521890638 | 5.651834247 | 0.36642821  | Oncofetal suppressor |
| ADH6          | 0.037650069 | 166.1943387 | 140.0500261 | 47.76439869 | Oncofetal suppressor |
| FH            | 16.85730417 | 71.4733136  | 90.95939647 | 32.61161684 | Oncofetal suppressor |
| C19orf66      | 1.812740974 | 15.159755   | 18.08265297 | 4.532979425 | Oncofetal suppressor |
| ACO1          | 19.70184396 | 36.68224862 | 44.82563072 | 18.05019567 | Oncofetal suppressor |
| CXCL14        | 7.362952321 | 29.68021346 | 31.16865809 | 0.306503924 | Oncofetal suppressor |
| LECT2         | 0.095228708 | 20.10840676 | 65.17521144 | 7.221655211 | Oncofetal suppressor |
| AKR1C4        | 0.057744538 | 140.5435259 | 128.0511886 | 18.92441425 | Oncofetal suppressor |
| SLC25A13      | 7.42458292  | 38.26066716 | 45.37876582 | 12.95255543 | Oncofetal suppressor |
| ST7           | 2.481906158 | 4.812663136 | 4.415139567 | 2.375848598 | Oncofetal suppressor |
| C10orf125     | 2.47116256  | 19.33054784 | 17.00755948 | 5.936167832 | Oncofetal suppressor |
| EVI2B         | 0.119955082 | 10.0670472  | 14.44287714 | 3.22879399  | Oncofetal suppressor |
| RND1          | 2.882827132 | 4.770734837 | 8.261920598 | 2.512560724 | Oncofetal suppressor |
| SHC2          | 5.573174112 | 10.84140966 | 8.632120891 | 2.632856397 | Oncofetal suppressor |
| STEAP4        | 0.019352716 | 7.914711145 | 8.082156987 | 0.964295281 | Oncofetal suppressor |
| FGL2          | 0.771260908 | 15.6765944  | 25.26703808 | 4.909745441 | Oncofetal suppressor |
| LST1          | 0.535713375 | 7.539946827 | 8.284656134 | 1.531317119 | Oncofetal suppressor |
| SLC45A3       | 0.839231932 | 4.855793841 | 3.439847516 | 2.28462163  | Oncofetal suppressor |
| GOT2          | 10.97393283 | 88.6800989  | 96.35937416 | 35.623797   | Oncofetal suppressor |
| IL1RN         | 0.118743414 | 3.01026665  | 6.79689705  | 1.291910274 | Oncofetal suppressor |
| HSD17B10      | 4.941216975 | 37.72905347 | 31.2171561  | 21.21089621 | Oncofetal suppressor |

|          |             |             |             |             |                      |
|----------|-------------|-------------|-------------|-------------|----------------------|
| HBB      | 0           | 45.35124927 | 20.70006901 | 0.669184564 | Oncofetal suppressor |
| MYRIP    | 1.020562436 | 5.593157528 | 4.741458507 | 2.652052344 | Oncofetal suppressor |
| METTL7A  | 11.16692464 | 180.9184401 | 139.7770201 | 54.83822874 | Oncofetal suppressor |
| BDH1     | 1.289590263 | 22.58437335 | 23.19903834 | 10.20763688 | Oncofetal suppressor |
| CLU      | 12.19275796 | 407.0192632 | 403.7391844 | 233.9172996 | Oncofetal suppressor |
| BCKDK    | 3.378023793 | 4.329957606 | 6.325139685 | 2.849591764 | Oncofetal suppressor |
| MYO1F    | 0.30307961  | 4.756376377 | 6.40794475  | 1.069920543 | Oncofetal suppressor |
| HCST     | 0.05447007  | 2.964813036 | 5.137566772 | 0.794371116 | Oncofetal suppressor |
| LPA      | 0.089359451 | 23.99561108 | 10.26855436 | 3.51997796  | Oncofetal suppressor |
| AMDHD1   | 1.379738352 | 103.3339258 | 67.93713492 | 10.54986027 | Oncofetal suppressor |
| NLN      | 2.934928267 | 5.776003376 | 5.785857913 | 2.062126372 | Oncofetal suppressor |
| C5orf27  | 0.168228103 | 20.94245077 | 21.30660327 | 0.359828437 | Oncofetal suppressor |
| MSMO1    | 78.08391882 | 85.29129078 | 158.7119282 | 23.3728319  | Oncofetal suppressor |
| APOA1    | 966.5229071 | 1785.349792 | 1772.45781  | 736.8124022 | Oncofetal suppressor |
| DPYS     | 0.473558024 | 62.84475749 | 93.49989768 | 35.18321664 | Oncofetal suppressor |
| AKR1D1   | 7.991848307 | 174.6224725 | 155.7660604 | 3.250171179 | Oncofetal suppressor |
| PRADC1   | 3.012868484 | 7.346695339 | 8.886128284 | 5.152402848 | Oncofetal suppressor |
| ENO3     | 0.530835706 | 5.982588762 | 20.95772928 | 1.563941271 | Oncofetal suppressor |
| C1orf168 | 4.565962723 | 9.417834779 | 11.01526745 | 2.453354525 | Oncofetal suppressor |
| BCKDHB   | 3.113737328 | 15.10960984 | 12.3753321  | 7.194622945 | Oncofetal suppressor |
| HAO1     | 0           | 169.4692306 | 189.7519634 | 32.66189985 | Oncofetal suppressor |
| STARD10  | 10.03452378 | 42.22748773 | 43.4250815  | 5.123223677 | Oncofetal suppressor |
| TMEM205  | 12.50731651 | 32.15094878 | 37.79917917 | 12.3709244  | Oncofetal suppressor |
| USP18    | 1.225806837 | 4.10083793  | 7.005441369 | 2.711458385 | Oncofetal suppressor |
| DUSP10   | 2.635236582 | 16.81558313 | 10.05264696 | 4.727430412 | Oncofetal suppressor |
| FAM210B  | 13.1326166  | 59.85101425 | 53.5356704  | 25.95275062 | Oncofetal suppressor |
| CFL2     | 19.99682538 | 29.28801152 | 31.82684864 | 15.54485304 | Oncofetal suppressor |
| CRAT     | 9.312399836 | 16.81582531 | 20.8267371  | 8.416256494 | Oncofetal suppressor |
| GSTA1    | 85.83013023 | 606.7240953 | 1195.515429 | 437.3732789 | Oncofetal suppressor |
| SLC39A8  | 4.315050852 | 9.078574153 | 11.08237989 | 3.138685321 | Oncofetal suppressor |
| MTTP     | 10.24740642 | 54.2474923  | 77.20983901 | 10.9179673  | Oncofetal suppressor |
| IGFALS   | 0.052591394 | 9.620281107 | 6.238228912 | 0.473440255 | Oncofetal suppressor |
| FGG      | 893.3689504 | 1505.533921 | 1672.295395 | 606.6177518 | Oncofetal suppressor |
| MGMT     | 2.204958231 | 8.61972168  | 7.295752445 | 1.943719148 | Oncofetal suppressor |
| NDUFAF1  | 5.342351872 | 8.716110985 | 11.98068809 | 5.637544177 | Oncofetal suppressor |
| GOLT1A   | 2.029897161 | 11.12941791 | 15.931482   | 6.263364515 | Oncofetal suppressor |
| MSRB1    | 3.123960784 | 16.62000066 | 19.57171319 | 7.240426953 | Oncofetal suppressor |
| GRHPR    | 4.151087444 | 27.46967125 | 24.76762804 | 5.437139412 | Oncofetal suppressor |
| HPN      | 15.97548025 | 63.38580472 | 63.21037965 | 23.01793462 | Oncofetal suppressor |
| C8A      | 0.498172255 | 211.8380186 | 220.9030627 | 22.10887217 | Oncofetal suppressor |
| ACYP2    | 1.739530004 | 4.082943501 | 5.551729503 | 1.943095506 | Oncofetal suppressor |
| RUNDC3B  | 0.064496726 | 4.454876692 | 5.27216884  | 1.339636895 | Oncofetal suppressor |
| TNFAIP2  | 0.112574005 | 6.248205556 | 10.88835885 | 2.34025406  | Oncofetal suppressor |
| ACOT12   | 0.180794275 | 23.52321202 | 40.72037853 | 0.961273558 | Oncofetal suppressor |

|          |             |             |             |             |                      |
|----------|-------------|-------------|-------------|-------------|----------------------|
| CCL19    | 0.05331337  | 7.791278388 | 16.16559298 | 0.633520337 | Oncofetal suppressor |
| ACSL1    | 14.43826142 | 146.007835  | 177.2627435 | 26.81619614 | Oncofetal suppressor |
| FCN3     | 0.318600894 | 21.28489527 | 40.45862151 | 0.113577596 | Oncofetal suppressor |
| HLA-E    | 52.2250242  | 101.3711727 | 141.5594115 | 51.02203403 | Oncofetal suppressor |
| CHI3L1   | 2.702477857 | 5.854726359 | 30.99675336 | 2.429187495 | Oncofetal suppressor |
| SLC9B2   | 5.743933114 | 8.576857747 | 10.47098756 | 1.685575428 | Oncofetal suppressor |
| MNDA     | 0.053649977 | 9.310558754 | 9.530074079 | 3.586051251 | Oncofetal suppressor |
| SERPINF2 | 31.93284651 | 347.1833184 | 323.7977958 | 187.8700659 | Oncofetal suppressor |
| CARD16   | 0.564433192 | 3.818161603 | 5.909486856 | 2.094322428 | Oncofetal suppressor |
| GLTPD1   | 1.404586193 | 4.664446594 | 5.102905393 | 3.002563283 | Oncofetal suppressor |
| BCHE     | 0.035842084 | 48.9392608  | 56.82525212 | 11.25999149 | Oncofetal suppressor |
| HDHD3    | 6.356346642 | 16.0817062  | 13.30902333 | 8.737327533 | Oncofetal suppressor |
| CYFIP2   | 2.199530346 | 8.799623152 | 8.792555437 | 0.973001942 | Oncofetal suppressor |
| CYP27A1  | 6.225939948 | 77.94711162 | 78.14788851 | 20.15455956 | Oncofetal suppressor |
| CCDC3    | 1.361685159 | 6.818993851 | 8.056375874 | 3.020991269 | Oncofetal suppressor |
| PQLC3    | 3.192568613 | 5.656932896 | 6.369278018 | 3.688151612 | Oncofetal suppressor |
| SHMT1    | 1.936426201 | 65.18935698 | 70.32609247 | 15.33959718 | Oncofetal suppressor |
| DUSP6    | 3.302409643 | 14.49594291 | 30.67102122 | 9.971425194 | Oncofetal suppressor |
| DPT      | 0.177820685 | 22.57426628 | 11.89426293 | 0.776728309 | Oncofetal suppressor |
| CDO1     | 1.173283813 | 92.74992435 | 101.4874017 | 13.40034035 | Oncofetal suppressor |
| SERPINA4 | 1.311125802 | 139.3739545 | 126.404017  | 34.26079361 | Oncofetal suppressor |
| MSRB2    | 4.380659812 | 12.99495628 | 13.81262145 | 7.458262148 | Oncofetal suppressor |
| SASH3    | 0.066213986 | 4.139514378 | 4.412592699 | 1.444333319 | Oncofetal suppressor |
| XPNPEP2  | 5.176088427 | 0.017649631 | 15.83244768 | 0.044749573 | Oncofetal suppressor |
| UGT3A1   | 2.856019515 | 8.954821436 | 11.16051865 | 2.760919435 | Oncofetal suppressor |
| MCCC2    | 3.906286671 | 24.29724867 | 25.73121927 | 15.31823712 | Oncofetal suppressor |
| SLAMF7   | 0.002999167 | 3.564555796 | 5.950928053 | 1.146926499 | Oncofetal suppressor |
| STEAP1   | 3.016552472 | 6.829954501 | 6.221707529 | 1.197911643 | Oncofetal suppressor |
| ALDOB    | 39.9202942  | 4436.466172 | 3729.789585 | 1907.115059 | Oncofetal suppressor |
| HLA-B    | 8.884534981 | 43.50684736 | 203.3536791 | 31.37075802 | Oncofetal suppressor |
| CTH      | 3.60362159  | 23.57670902 | 58.4187643  | 3.568472569 | Oncofetal suppressor |
| COLEC11  | 3.331559747 | 19.00549186 | 13.45339121 | 2.266338384 | Oncofetal suppressor |
| EPB41L4B | 1.190050313 | 13.59672707 | 8.92204269  | 5.266020241 | Oncofetal suppressor |
| TMEM150C | 0.864927119 | 5.131800644 | 5.262893071 | 2.057565879 | Oncofetal suppressor |
| ACSS2    | 6.626279461 | 11.31315251 | 27.12237689 | 7.895275098 | Oncofetal suppressor |
| SIGIRR   | 1.678623901 | 5.489425546 | 5.656973074 | 0.787213596 | Oncofetal suppressor |
| C11orf1  | 2.277932353 | 7.041116894 | 4.346406224 | 2.301139613 | Oncofetal suppressor |
| PLA2G16  | 4.510785117 | 11.80811843 | 14.77539634 | 2.407596222 | Oncofetal suppressor |
| GPR183   | 0.779755072 | 2.531510747 | 5.663478999 | 1.066092766 | Oncofetal suppressor |
| HYAL1    | 0.348290184 | 25.70617233 | 27.07502063 | 5.722287338 | Oncofetal suppressor |
| LHPP     | 2.109957936 | 6.201691079 | 6.599222498 | 2.686736167 | Oncofetal suppressor |
| OSGIN1   | 0.351190266 | 12.56303429 | 7.706614131 | 3.485551992 | Oncofetal suppressor |
| IRF8     | 1.309950119 | 4.067009236 | 6.301442707 | 1.805119824 | Oncofetal suppressor |
| HRSP12   | 5.128494388 | 199.2238194 | 254.3735608 | 79.48974865 | Oncofetal suppressor |



|          |             |             |             |             |                  |
|----------|-------------|-------------|-------------|-------------|------------------|
| ECT2     | 3.776591515 | 0.243395222 | 0.86665232  | 7.31585125  | Oncofetal driver |
| SPOPL    | 8.206335423 | 3.005276212 | 3.731805227 | 11.88617289 | Oncofetal driver |
| SLC39A10 | 13.07952612 | 0.806740622 | 1.09903144  | 3.542054526 | Oncofetal driver |
| ZNF841   | 12.03761142 | 2.650935664 | 3.126133681 | 17.39876325 | Oncofetal driver |
| C5orf42  | 3.297391758 | 0.830624546 | 1.0190406   | 2.524015925 | Oncofetal driver |
| FAR1     | 9.5650198   | 1.649824381 | 2.060369066 | 6.690660711 | Oncofetal driver |
| BAX      | 5.262794143 | 1.552103196 | 2.998204796 | 4.730965669 | Oncofetal driver |
| CBLL1    | 8.207704256 | 3.476900045 | 3.824763296 | 8.462340794 | Oncofetal driver |
| FBN1     | 41.87166041 | 1.73762997  | 1.354226097 | 3.200777509 | Oncofetal driver |
| TUBB4A   | 9.948400704 | 0.144120635 | 0.548616419 | 2.466511891 | Oncofetal driver |
| SCGN     | 15.51629066 | 1.152653832 | 0.800044952 | 6.061448712 | Oncofetal driver |
| SLC30A6  | 8.676560391 | 3.63127417  | 4.262178716 | 8.086821831 | Oncofetal driver |
| FAM219A  | 15.79431834 | 1.508136515 | 1.99984443  | 4.241861946 | Oncofetal driver |
| DZIP1    | 4.066307455 | 1.128153664 | 0.772323475 | 4.929903354 | Oncofetal driver |
| COL4A2   | 237.5336716 | 3.32436818  | 6.127231611 | 31.46374535 | Oncofetal driver |
| TMED9    | 102.372813  | 16.83586693 | 26.00792579 | 48.28919074 | Oncofetal driver |
| IGF2BP2  | 63.4971352  | 1.369849896 | 1.308027032 | 7.225142233 | Oncofetal driver |
| C11orf80 | 8.4564485   | 0.59692011  | 0.977646486 | 2.152994067 | Oncofetal driver |
| ZNF230   | 2.055183949 | 0.887037745 | 0.943241123 | 4.407811269 | Oncofetal driver |
| GALNTL4  | 2.718232199 | 0.965125469 | 1.303317417 | 2.301018843 | Oncofetal driver |
| ZNF223   | 5.210951219 | 1.424497253 | 1.630514149 | 6.682775901 | Oncofetal driver |
| GPC3     | 338.4757085 | 1.503896967 | 1.729451655 | 311.0846369 | Oncofetal driver |
| NUP155   | 3.767222128 | 1.949175786 | 1.790893073 | 7.711098285 | Oncofetal driver |
| NIPAL3   | 6.936384593 | 1.042261613 | 0.894551893 | 2.593419526 | Oncofetal driver |
| PJA1     | 14.31777857 | 2.106168577 | 3.221387796 | 6.936577028 | Oncofetal driver |
| UGT2B11  | 6.544124984 | 1.249553622 | 2.382943008 | 3.719569199 | Oncofetal driver |
| CNOT6    | 6.966979158 | 1.735216495 | 2.463802773 | 6.604400979 | Oncofetal driver |
| REEP1    | 11.04326455 | 1.152524823 | 0.323221419 | 2.601719354 | Oncofetal driver |
| NREP     | 8.791852566 | 3.228614022 | 4.196954247 | 14.84063965 | Oncofetal driver |
| BCAM     | 72.86211087 | 6.533692727 | 7.296155234 | 55.77960337 | Oncofetal driver |
| STXBP5   | 2.658773175 | 0.967467936 | 1.414198715 | 2.702712116 | Oncofetal driver |
| TOR1AIP2 | 15.66295779 | 5.272194314 | 6.02081519  | 12.24851202 | Oncofetal driver |
| JARID2   | 6.427497626 | 1.713292342 | 1.721335546 | 5.009332004 | Oncofetal driver |
| ZBTB9    | 3.563888833 | 1.432895271 | 2.109882908 | 6.096223111 | Oncofetal driver |
| KLHL11   | 2.850867    | 0.604862149 | 0.761089064 | 2.234661844 | Oncofetal driver |
| MYSM1    | 13.73246347 | 3.817372748 | 4.718907642 | 9.60278371  | Oncofetal driver |
| ZNF577   | 4.061621646 | 2.152124916 | 1.255253963 | 8.007933514 | Oncofetal driver |
| TLCD1    | 4.160354139 | 0.753912521 | 1.486450161 | 5.051820585 | Oncofetal driver |
| EIF1AD   | 4.756283283 | 2.147628134 | 2.569109385 | 4.996833883 | Oncofetal driver |
| ZNF567   | 4.303244573 | 1.600853496 | 2.092320876 | 7.83901427  | Oncofetal driver |
| XRCC1    | 10.58932365 | 3.977184448 | 5.397296599 | 17.62732938 | Oncofetal driver |
| LIMK2    | 7.022692809 | 0.670800386 | 1.263362179 | 6.306280977 | Oncofetal driver |
| RPS5     | 245.0762287 | 134.7334641 | 101.608574  | 242.3128899 | Oncofetal driver |
| ZNF8     | 2.592935534 | 0.680162991 | 1.091313203 | 2.996803976 | Oncofetal driver |

|          |             |             |             |             |                  |
|----------|-------------|-------------|-------------|-------------|------------------|
| HELZ     | 9.998741039 | 4.720603511 | 4.700221992 | 16.99410488 | Oncofetal driver |
| KITLG    | 5.02563659  | 0.656221065 | 0.695346094 | 2.365762975 | Oncofetal driver |
| TPGS2    | 11.28603223 | 3.491730867 | 4.945129274 | 13.57230263 | Oncofetal driver |
| ENTPD7   | 6.8455562   | 0.979730659 | 3.15506197  | 7.568392352 | Oncofetal driver |
| STX6     | 4.912561891 | 1.494790698 | 2.159592613 | 6.518525888 | Oncofetal driver |
| DAB2IP   | 4.783917462 | 1.770630761 | 1.991859459 | 5.764008972 | Oncofetal driver |
| RASAL2   | 6.030117433 | 1.813798985 | 2.066909161 | 6.272437594 | Oncofetal driver |
| UBE2K    | 34.95874029 | 14.50612318 | 16.56487354 | 36.6400459  | Oncofetal driver |
| ZUFSP    | 6.482973991 | 1.721104795 | 3.319860228 | 7.505999519 | Oncofetal driver |
| CA11     | 21.56011373 | 1.208318129 | 1.330649478 | 10.86930037 | Oncofetal driver |
| SMNDC1   | 13.80816273 | 6.170080616 | 7.451979697 | 15.54784806 | Oncofetal driver |
| MAB21L2  | 10.72914704 | 1.079049217 | 0.739142843 | 6.630764324 | Oncofetal driver |
| ASB1     | 2.851078134 | 0.90034553  | 1.12746056  | 2.48508087  | Oncofetal driver |
| VPS72    | 7.62898711  | 3.032255494 | 3.542052419 | 19.23256462 | Oncofetal driver |
| FAM208A  | 10.11436675 | 4.097706217 | 5.672055939 | 11.97998541 | Oncofetal driver |
| SSR2     | 17.14030844 | 6.835881599 | 6.982658662 | 24.69939589 | Oncofetal driver |
| CHMP4C   | 10.58181817 | 2.604250608 | 3.226076227 | 6.714834088 | Oncofetal driver |
| COL1A2   | 100.3150453 | 5.56559811  | 6.38475476  | 17.49491194 | Oncofetal driver |
| BRPF3    | 13.97716562 | 4.598647087 | 4.22156489  | 15.41689728 | Oncofetal driver |
| RAVER2   | 5.605158642 | 0.671674576 | 0.778769732 | 3.704556899 | Oncofetal driver |
| EFNB2    | 22.81591628 | 3.222734445 | 3.23670686  | 9.559724363 | Oncofetal driver |
| CKAP2    | 7.246351685 | 1.691631265 | 3.643893755 | 16.47473062 | Oncofetal driver |
| ZNF35    | 2.146668933 | 0.989740208 | 1.014351649 | 2.2937727   | Oncofetal driver |
| GPR160   | 6.374427746 | 1.039261562 | 1.272444757 | 3.79437832  | Oncofetal driver |
| SYNE2    | 12.31896524 | 3.35898426  | 3.963941451 | 18.59091474 | Oncofetal driver |
| ZNF836   | 3.020147203 | 1.186173796 | 1.273558906 | 5.404051331 | Oncofetal driver |
| BEX5     | 2.896726517 | 1.007285285 | 0.980149145 | 3.262551175 | Oncofetal driver |
| ACSL4    | 13.80592876 | 2.188714105 | 5.188047528 | 209.2536653 | Oncofetal driver |
| C12orf32 | 3.034584599 | 1.221108166 | 1.473255905 | 7.180745417 | Oncofetal driver |
| MGAT5    | 8.375363798 | 0.984192895 | 1.147138364 | 3.226580885 | Oncofetal driver |
| ARPP19   | 28.25712641 | 7.421418346 | 9.394766215 | 17.04067876 | Oncofetal driver |
| FKBP10   | 43.89562551 | 1.523856869 | 1.522180012 | 3.290869219 | Oncofetal driver |
| CAPG     | 10.37816573 | 0.848106453 | 1.472339006 | 7.951193267 | Oncofetal driver |
| SRCAP    | 5.644165056 | 2.596117671 | 3.041148958 | 10.29036546 | Oncofetal driver |
| GOLT1B   | 28.35786048 | 3.398892502 | 4.891772876 | 19.78189146 | Oncofetal driver |
| CCDC122  | 3.755550475 | 0.804630881 | 1.520763363 | 3.770529065 | Oncofetal driver |
| GPX7     | 4.785087733 | 1.36381928  | 1.814200102 | 9.407731024 | Oncofetal driver |
| SUV39H2  | 2.602828991 | 0.947254603 | 1.602004926 | 5.705099825 | Oncofetal driver |
| ZNF256   | 3.381590872 | 1.139288327 | 1.750060538 | 6.433385309 | Oncofetal driver |
| APCDD1   | 5.517547425 | 0.992715595 | 0.462244251 | 2.991246221 | Oncofetal driver |
| LNX2     | 15.63233298 | 4.033656125 | 5.277283903 | 13.42487187 | Oncofetal driver |
| TAF7     | 53.32598287 | 23.33492282 | 27.99132942 | 70.50911155 | Oncofetal driver |
| DMKN     | 3.799149901 | 0.146902072 | 0.132455955 | 4.318945182 | Oncofetal driver |
| TOP2A    | 9.194001156 | 0.355076459 | 3.405073513 | 56.35581989 | Oncofetal driver |

|           |             |             |             |             |                  |
|-----------|-------------|-------------|-------------|-------------|------------------|
| HDAC5     | 15.09644072 | 4.758365158 | 3.810348628 | 10.06802386 | Oncofetal driver |
| TNPO1     | 19.58352415 | 4.487922601 | 5.567389323 | 10.27101327 | Oncofetal driver |
| NUDCD1    | 7.701962358 | 1.20606472  | 1.403941615 | 4.239061816 | Oncofetal driver |
| MLLT4     | 34.28279615 | 13.74538613 | 16.6080895  | 45.17126694 | Oncofetal driver |
| RPL18     | 65.27793346 | 28.85414787 | 26.3768301  | 57.81615048 | Oncofetal driver |
| MCMBP     | 9.891513608 | 4.648963385 | 4.852818651 | 10.81849533 | Oncofetal driver |
| FBXO30    | 5.487293186 | 1.449291729 | 1.95766027  | 7.874125028 | Oncofetal driver |
| UBE2D2    | 21.37294044 | 7.660499366 | 9.439624384 | 19.38472438 | Oncofetal driver |
| CCDC43    | 12.10959079 | 3.611652667 | 4.764944997 | 10.66412881 | Oncofetal driver |
| ENC1      | 22.62369001 | 3.907235339 | 4.310349787 | 10.86447786 | Oncofetal driver |
| PAIP2     | 25.62497393 | 6.728863407 | 9.705306011 | 17.01334792 | Oncofetal driver |
| SUMO2     | 76.57864349 | 27.47584343 | 30.00311234 | 126.8766006 | Oncofetal driver |
| PARG      | 3.965724629 | 1.557267369 | 1.855005228 | 4.302316561 | Oncofetal driver |
| TBL1XR1   | 16.70795495 | 6.171162699 | 7.03680892  | 15.59953078 | Oncofetal driver |
| ITGB1     | 216.6194131 | 84.14811671 | 114.6169177 | 267.1162777 | Oncofetal driver |
| SOCS4     | 4.501425759 | 1.280556759 | 2.514876502 | 6.738168685 | Oncofetal driver |
| RND2      | 3.440406457 | 0.703889137 | 1.03578601  | 3.867380035 | Oncofetal driver |
| PLAGL2    | 6.762490211 | 0.985347477 | 1.701155472 | 5.843721613 | Oncofetal driver |
| SMARCC1   | 17.6842016  | 6.986744998 | 8.505191203 | 16.43061492 | Oncofetal driver |
| TMED3     | 17.52823835 | 1.04108812  | 1.714130259 | 3.805895419 | Oncofetal driver |
| NR6A1     | 4.105843968 | 0.794536637 | 0.599576153 | 2.069420602 | Oncofetal driver |
| IVNS1ABP  | 18.41088363 | 4.947194361 | 6.740514099 | 38.8687487  | Oncofetal driver |
| TMEM181   | 8.876676038 | 3.331272276 | 4.753800807 | 17.67151501 | Oncofetal driver |
| PTTG1     | 3.057031051 | 0.276598689 | 1.295893708 | 6.734699402 | Oncofetal driver |
| HIPK1     | 7.411304703 | 2.98086907  | 4.114327754 | 8.651260347 | Oncofetal driver |
| PYGO2     | 6.504671697 | 2.461872262 | 3.162583574 | 9.449186672 | Oncofetal driver |
| ANO6      | 44.42086787 | 13.00485939 | 17.42940756 | 93.84368537 | Oncofetal driver |
| CCNB1     | 5.441215023 | 0.547382342 | 1.410498851 | 8.843201366 | Oncofetal driver |
| CDKN1A    | 28.20265933 | 4.291662368 | 22.88566427 | 33.65718937 | Oncofetal driver |
| SOX4      | 40.84112445 | 2.943414953 | 3.248711385 | 41.62462835 | Oncofetal driver |
| PKNOX1    | 5.615999561 | 1.349700879 | 1.477208588 | 4.264583205 | Oncofetal driver |
| PDE9A     | 7.638279153 | 1.481974619 | 0.600889567 | 5.170929567 | Oncofetal driver |
| SLC37A1   | 5.487108736 | 0.527785685 | 0.725808806 | 3.04904429  | Oncofetal driver |
| MYBL2     | 2.203539764 | 0.115163511 | 0.417254367 | 9.026666269 | Oncofetal driver |
| MATN2     | 13.76634998 | 6.852858268 | 5.514280512 | 12.83122216 | Oncofetal driver |
| PRPF39    | 11.95475564 | 4.538254917 | 4.850988973 | 11.4051527  | Oncofetal driver |
| GGA2      | 10.80193899 | 3.44980125  | 3.431785581 | 7.630424681 | Oncofetal driver |
| USP37     | 2.129935112 | 1.041752508 | 0.976143831 | 4.128136056 | Oncofetal driver |
| PPM1D     | 6.76490318  | 1.930821433 | 4.414025246 | 13.99620117 | Oncofetal driver |
| MAPK1     | 14.4025861  | 5.069701742 | 5.912915152 | 12.4762725  | Oncofetal driver |
| RGP1      | 4.484768172 | 1.583058792 | 1.418865237 | 3.04770768  | Oncofetal driver |
| ANXA2     | 66.90275533 | 6.941547845 | 11.0950555  | 21.10158957 | Oncofetal driver |
| MAPK1IP1L | 22.68319985 | 8.601922009 | 12.75393695 | 21.79478201 | Oncofetal driver |
| COL12A1   | 115.8530973 | 1.260957367 | 1.118135925 | 4.26835458  | Oncofetal driver |

|          |             |             |             |             |                  |
|----------|-------------|-------------|-------------|-------------|------------------|
| FOXJ2    | 9.033643943 | 2.662208687 | 2.237122733 | 6.919267663 | Oncofetal driver |
| FOXJ3    | 15.11025264 | 4.52869772  | 5.307154425 | 13.47745732 | Oncofetal driver |
| BCL2L11  | 6.720342648 | 1.596678245 | 2.456593451 | 9.291769442 | Oncofetal driver |
| TEAD4    | 2.528255147 | 0.308143493 | 0.823749336 | 2.787000248 | Oncofetal driver |
| CALM3    | 110.2929392 | 34.02123381 | 36.58178728 | 104.0846515 | Oncofetal driver |
| PRRC1    | 16.99782547 | 2.725811681 | 4.267546272 | 9.293002864 | Oncofetal driver |
| RNF38    | 8.707100983 | 3.178197897 | 4.049251721 | 8.116415532 | Oncofetal driver |
| UBAP2    | 9.51865242  | 2.293952935 | 2.331333002 | 5.702301842 | Oncofetal driver |
| SPAG9    | 18.30572481 | 7.811538339 | 8.017138049 | 18.92559767 | Oncofetal driver |
| ZBTB1    | 14.72841615 | 3.957601689 | 6.085115542 | 11.26159893 | Oncofetal driver |
| HSPA2    | 7.932038567 | 0.652309474 | 1.127375323 | 3.64643651  | Oncofetal driver |
| USP39    | 8.438704843 | 3.250165082 | 4.577846294 | 9.617134733 | Oncofetal driver |
| MED10    | 16.76810399 | 3.953955373 | 5.131493998 | 15.36481346 | Oncofetal driver |
| ZNF766   | 11.93753819 | 4.777705025 | 4.981238487 | 19.66269112 | Oncofetal driver |
| NSUN5    | 3.259923596 | 1.399287256 | 1.525920535 | 3.09996309  | Oncofetal driver |
| CCDC14   | 12.62766603 | 4.628289179 | 5.071938575 | 16.18033483 | Oncofetal driver |
| UBE2Z    | 10.58713815 | 4.255689083 | 4.698675269 | 13.68233942 | Oncofetal driver |
| ZNF587   | 9.211508006 | 2.763590343 | 3.193485675 | 12.37309717 | Oncofetal driver |
| TPM2     | 31.55894766 | 6.715465482 | 4.504709119 | 12.4977334  | Oncofetal driver |
| PAFAH1B3 | 2.992339648 | 0.596106907 | 0.670277529 | 6.088754955 | Oncofetal driver |
| NONO     | 50.53642099 | 25.25099055 | 25.07983906 | 79.27560246 | Oncofetal driver |
| KPNB1    | 46.3125562  | 18.82657917 | 24.65704921 | 57.12302212 | Oncofetal driver |
| TUBD1    | 7.506972975 | 2.891887836 | 2.593293933 | 6.996059987 | Oncofetal driver |
| NUFIP2   | 24.19562797 | 5.801678578 | 9.732957585 | 28.31331095 | Oncofetal driver |
| ANKRD27  | 6.145919273 | 1.923636665 | 2.422092824 | 8.677578304 | Oncofetal driver |
| H2AFX    | 5.578018648 | 1.990230964 | 2.869058354 | 7.596891556 | Oncofetal driver |
| ERH      | 43.44097926 | 18.71539994 | 22.7427243  | 51.39354633 | Oncofetal driver |
| C1orf144 | 20.91731581 | 8.675473242 | 10.01505046 | 22.02127707 | Oncofetal driver |
| EFNA4    | 4.252870388 | 1.2390609   | 1.237409194 | 5.544978747 | Oncofetal driver |
| CAPN6    | 14.59377288 | 0.155819329 | 0.15141359  | 49.948199   | Oncofetal driver |
| SKIL     | 24.3142192  | 4.037808499 | 7.028999412 | 17.35181652 | Oncofetal driver |
| CBX5     | 14.90605274 | 3.706651643 | 4.771061319 | 17.99482904 | Oncofetal driver |
| MID1IP1  | 14.70313624 | 2.454742224 | 7.897907753 | 27.04483253 | Oncofetal driver |
| PHF10    | 21.37343674 | 10.16950228 | 9.890716583 | 24.04832745 | Oncofetal driver |
| ETNK1    | 3.850763107 | 1.532578077 | 2.15110707  | 6.502369995 | Oncofetal driver |
| GTPBP4   | 9.500535919 | 2.837519744 | 3.905232679 | 11.50516531 | Oncofetal driver |
| TCFL5    | 2.435316243 | 1.360363944 | 0.920920972 | 2.98243661  | Oncofetal driver |
| ARFGAP1  | 11.73171587 | 1.894019868 | 2.33226014  | 4.877771145 | Oncofetal driver |
| LCOR     | 6.756367288 | 2.341595938 | 3.099525706 | 8.80790991  | Oncofetal driver |
| MGAT4A   | 9.268612607 | 1.199996002 | 1.558301239 | 7.525978633 | Oncofetal driver |
| FADS1    | 10.60218017 | 0.929900288 | 5.141459256 | 12.8324341  | Oncofetal driver |
| MEP1A    | 47.4548165  | 0           | 0.053373216 | 2.305562365 | Oncofetal driver |
| ARL5B    | 36.58702594 | 4.721447884 | 10.37383283 | 21.39223607 | Oncofetal driver |
| HSF2     | 8.595032949 | 2.259178801 | 2.808275016 | 5.769339098 | Oncofetal driver |

|           |             |             |             |             |                  |
|-----------|-------------|-------------|-------------|-------------|------------------|
| ENO2      | 8.379690515 | 0.918830885 | 0.803566126 | 3.573821725 | Oncofetal driver |
| ATN1      | 37.67179757 | 6.590059707 | 7.385732927 | 30.60157046 | Oncofetal driver |
| TNIK      | 5.95851539  | 1.657483978 | 1.922238974 | 5.416201805 | Oncofetal driver |
| SALL2     | 3.340726043 | 0.241798295 | 0.287707995 | 4.191362605 | Oncofetal driver |
| RUFY2     | 3.579200983 | 1.62609118  | 1.839827411 | 4.319488771 | Oncofetal driver |
| TBP       | 9.218999169 | 3.810945446 | 4.215029827 | 12.36819319 | Oncofetal driver |
| ATP1A1    | 195.9138868 | 14.97621759 | 18.16507886 | 70.04254178 | Oncofetal driver |
| CD248     | 7.23336124  | 1.191361567 | 0.791991333 | 6.612720309 | Oncofetal driver |
| CCNA2     | 3.761823381 | 0.250304618 | 1.565903739 | 6.399652898 | Oncofetal driver |
| JAG1      | 4.792845632 | 1.935982398 | 2.349351075 | 9.373407761 | Oncofetal driver |
| DR1       | 12.18246758 | 4.532822114 | 5.063412539 | 14.4055328  | Oncofetal driver |
| GTPBP2    | 4.585769813 | 2.17688974  | 2.307304684 | 7.852503041 | Oncofetal driver |
| TARSL2    | 11.51282678 | 2.183102219 | 2.984236902 | 5.998824725 | Oncofetal driver |
| FADS2     | 5.822070426 | 0.270789877 | 2.855839765 | 6.244079257 | Oncofetal driver |
| AGFG1     | 17.02380188 | 4.402858993 | 5.766101293 | 14.41826553 | Oncofetal driver |
| DONSON    | 12.42734645 | 3.200080571 | 5.712412768 | 20.69484346 | Oncofetal driver |
| TCEAL4    | 225.9017622 | 44.42983482 | 51.19820922 | 105.9750439 | Oncofetal driver |
| PYCR1     | 6.908865896 | 0.107023055 | 0.233993281 | 2.22507405  | Oncofetal driver |
| ZFR       | 27.00439127 | 10.82919524 | 11.78345752 | 27.9586002  | Oncofetal driver |
| CEP192    | 4.318958978 | 1.549209521 | 1.730626621 | 4.557793949 | Oncofetal driver |
| ARL6IP6   | 4.535158033 | 1.083086406 | 0.879164586 | 3.195420572 | Oncofetal driver |
| ZNF451    | 5.125220474 | 2.272856647 | 2.481559636 | 5.092118236 | Oncofetal driver |
| CCNB2     | 3.359355754 | 0.248223116 | 1.205240322 | 11.29160456 | Oncofetal driver |
| EDC3      | 4.478249914 | 1.452644497 | 1.746819685 | 3.981247519 | Oncofetal driver |
| SALL4     | 4.046223503 | 0.289017591 | 0.156787928 | 2.661172581 | Oncofetal driver |
| RAD1      | 4.438702612 | 1.942511962 | 2.482055769 | 6.54072938  | Oncofetal driver |
| C16orf53  | 8.136585196 | 2.058099644 | 1.774971271 | 5.696613953 | Oncofetal driver |
| POLR2M    | 3.670085056 | 1.561688239 | 1.337716891 | 3.994493571 | Oncofetal driver |
| ZNF579    | 3.538102637 | 0.960163809 | 0.766075669 | 4.059691169 | Oncofetal driver |
| PARD6B    | 13.10986588 | 1.350673525 | 1.747357313 | 4.881169027 | Oncofetal driver |
| CASK      | 12.25050668 | 1.821179538 | 2.650261718 | 6.078883112 | Oncofetal driver |
| ZNF764    | 2.656951324 | 1.031876895 | 1.072256414 | 3.378139939 | Oncofetal driver |
| MPZL1     | 40.9263864  | 2.787637941 | 3.529167031 | 12.27463882 | Oncofetal driver |
| YEATS2    | 11.53338416 | 1.245632702 | 1.306943702 | 3.86565173  | Oncofetal driver |
| GDI1      | 19.74548855 | 5.409661666 | 5.671801505 | 14.21176186 | Oncofetal driver |
| BMP8B     | 5.313310137 | 0.108100985 | 0.296375457 | 2.636422435 | Oncofetal driver |
| 42254     | 46.28475627 | 11.69163385 | 12.87937082 | 30.46077555 | Oncofetal driver |
| PPDPF     | 16.6859151  | 6.230072239 | 7.513182656 | 20.32955916 | Oncofetal driver |
| ACTN4     | 80.23123743 | 22.59723868 | 24.0328801  | 141.9614124 | Oncofetal driver |
| PVR       | 30.55856632 | 5.49459626  | 7.694364467 | 19.2208254  | Oncofetal driver |
| SYNM      | 14.86964978 | 1.862113542 | 0.937820238 | 14.15524351 | Oncofetal driver |
| TMEM39A   | 12.55499364 | 3.212433553 | 3.751792777 | 9.121092392 | Oncofetal driver |
| C20orf194 | 3.103097941 | 1.056973405 | 0.953401944 | 3.594505403 | Oncofetal driver |
| PRCC      | 11.67606941 | 4.919630361 | 5.798663203 | 15.69940569 | Oncofetal driver |

|           |             |             |             |             |                  |
|-----------|-------------|-------------|-------------|-------------|------------------|
| TMEM167A  | 33.23187003 | 7.686052134 | 12.33223054 | 23.56920251 | Oncofetal driver |
| DCTN5     | 6.404910526 | 2.678177783 | 2.150472964 | 4.978921271 | Oncofetal driver |
| UBE2I     | 3.217587724 | 1.177070154 | 1.221501362 | 2.623175966 | Oncofetal driver |
| MAN2A1    | 25.26607448 | 7.83564925  | 8.189716752 | 16.22953194 | Oncofetal driver |
| ANKRD10   | 25.01516882 | 8.743551637 | 10.43525172 | 23.74423634 | Oncofetal driver |
| GPC6      | 19.9860526  | 4.119816602 | 4.448598531 | 14.18036199 | Oncofetal driver |
| CBFA2T2   | 3.841522273 | 1.876879053 | 1.609738327 | 6.354940931 | Oncofetal driver |
| CAND1     | 13.37333959 | 4.83603757  | 4.797110742 | 11.38648048 | Oncofetal driver |
| TAOK2     | 3.922323106 | 1.636750909 | 2.238731809 | 4.105420078 | Oncofetal driver |
| SEMA4B    | 5.337344314 | 1.371574253 | 1.96219079  | 4.407299968 | Oncofetal driver |
| TMEM101   | 9.007197284 | 3.547553723 | 2.950769208 | 7.765531375 | Oncofetal driver |
| MORF4L1   | 90.8960481  | 23.33715083 | 28.0741979  | 74.80124915 | Oncofetal driver |
| RPL38     | 163.480136  | 60.71967687 | 46.65631    | 204.5694761 | Oncofetal driver |
| WEE1      | 7.209191776 | 1.703361162 | 3.984856365 | 7.175037003 | Oncofetal driver |
| TMEM91    | 2.085037784 | 0.75400146  | 0.633678489 | 3.133652613 | Oncofetal driver |
| RAB11FIP3 | 23.78667513 | 3.500868638 | 3.243734575 | 7.339014961 | Oncofetal driver |
| FAM50A    | 28.01975833 | 9.770208466 | 11.8081534  | 42.64894042 | Oncofetal driver |
| RERE      | 30.22718818 | 5.536702786 | 5.578825731 | 15.76719281 | Oncofetal driver |
| GOLM1     | 63.25102949 | 5.407750207 | 18.79817121 | 38.4880116  | Oncofetal driver |
| ZNF192    | 5.516945565 | 2.355976629 | 2.543154334 | 8.135820517 | Oncofetal driver |
| UNC5B     | 4.878574669 | 1.041451186 | 1.023808439 | 3.905203189 | Oncofetal driver |
| ZNF609    | 8.652177403 | 4.133423866 | 4.232809547 | 11.93435119 | Oncofetal driver |
| SLC41A1   | 3.679570184 | 0.978221361 | 0.962140998 | 4.878315874 | Oncofetal driver |
| OSBPL1A   | 6.162206751 | 2.618182555 | 3.182063608 | 6.311909963 | Oncofetal driver |
| GREB1L    | 9.508483017 | 0.351576191 | 0.447935744 | 2.89957004  | Oncofetal driver |
| UTRN      | 24.58234369 | 6.64510002  | 7.00726535  | 35.20430172 | Oncofetal driver |
| APOBEC3F  | 2.768447184 | 0.781222084 | 1.041493847 | 2.353424484 | Oncofetal driver |
| ATP1B1    | 101.0230544 | 24.40641423 | 39.27994067 | 73.83460952 | Oncofetal driver |
| FTH1      | 73.08803374 | 13.825544   | 38.65536734 | 75.41295017 | Oncofetal driver |
| GTF3C4    | 3.595955238 | 1.165842386 | 1.534080077 | 3.258608177 | Oncofetal driver |
| AMOTL1    | 20.08960397 | 2.823471886 | 2.807159886 | 9.346796689 | Oncofetal driver |
| MAX       | 15.72198031 | 6.274981546 | 6.520032256 | 13.00060955 | Oncofetal driver |
| PTPDC1    | 2.517946195 | 0.450974533 | 0.701225455 | 2.286837402 | Oncofetal driver |
| POGK      | 9.587776461 | 3.16263448  | 3.719158206 | 14.34729236 | Oncofetal driver |
| UBAP2L    | 24.53741618 | 7.503190526 | 9.105895259 | 31.19587378 | Oncofetal driver |
| PLXNA2    | 2.273472261 | 0.927883129 | 0.807842599 | 2.404546747 | Oncofetal driver |
| FBRS      | 5.692469635 | 2.620287553 | 2.736094959 | 6.116312568 | Oncofetal driver |
| TULP3     | 10.10700571 | 3.743861044 | 3.465882544 | 18.7190497  | Oncofetal driver |
| WDR20     | 3.137362301 | 1.197034174 | 1.629809551 | 3.099127762 | Oncofetal driver |
| TRIO      | 5.827833708 | 1.660241922 | 2.033080328 | 4.243538069 | Oncofetal driver |
| GPX8      | 41.00681624 | 1.229724782 | 0.783149829 | 2.09980545  | Oncofetal driver |
| MACF1     | 15.49065208 | 5.967855979 | 6.1293868   | 13.63155289 | Oncofetal driver |
| IGF2      | 5242.757018 | 116.518041  | 128.4453174 | 4214.156046 | Oncofetal driver |
| IER3      | 14.55152252 | 2.429644335 | 6.36032787  | 8.860811446 | Oncofetal driver |

|          |             |             |             |             |                  |
|----------|-------------|-------------|-------------|-------------|------------------|
| TNNT2    | 4.020506109 | 0.067873871 | 0.01324984  | 2.028204787 | Oncofetal driver |
| COMMD2   | 8.486061239 | 3.298126924 | 4.047064093 | 9.505061289 | Oncofetal driver |
| BCL9     | 6.37068193  | 1.356712261 | 1.322358827 | 11.34074067 | Oncofetal driver |
| ZNF107   | 2.748574185 | 1.121273819 | 1.380274829 | 3.402633021 | Oncofetal driver |
| CENPJ    | 7.640534926 | 1.169539809 | 2.058122105 | 7.859735986 | Oncofetal driver |
| BAG5     | 9.865593023 | 3.738533979 | 5.267438187 | 10.65041533 | Oncofetal driver |
| ZBTB6    | 4.368437258 | 1.80536894  | 2.208567022 | 6.909700246 | Oncofetal driver |
| RAB1A    | 113.6178716 | 25.49325151 | 41.84565987 | 85.38381014 | Oncofetal driver |
| HMGN4    | 14.59014512 | 6.393205334 | 7.083246141 | 17.81757708 | Oncofetal driver |
| ASXL1    | 10.14974009 | 4.088946674 | 5.081252547 | 10.89870929 | Oncofetal driver |
| KLHDC5   | 4.197522046 | 1.877579223 | 2.040317561 | 5.47774226  | Oncofetal driver |
| EPB41L1  | 7.468952761 | 2.551961269 | 1.733281423 | 6.178048935 | Oncofetal driver |
| MAST2    | 4.584571378 | 1.751507772 | 1.521641753 | 3.514021215 | Oncofetal driver |
| B3GALTL  | 3.749917166 | 0.879389174 | 1.394471694 | 3.552720143 | Oncofetal driver |
| CASC3    | 15.24145349 | 6.80015213  | 7.538396761 | 17.73328316 | Oncofetal driver |
| PDCD4    | 108.6688705 | 13.10846694 | 16.08222666 | 30.25406626 | Oncofetal driver |
| CADM4    | 8.388966509 | 1.88311393  | 1.737916276 | 7.074381008 | Oncofetal driver |
| TLK2     | 6.14804263  | 2.74181995  | 3.301898789 | 9.381041054 | Oncofetal driver |
| TRIP4    | 8.650472598 | 4.000019957 | 4.240463672 | 13.02519466 | Oncofetal driver |
| BRWD3    | 8.401941775 | 1.860575657 | 1.971392737 | 7.025831004 | Oncofetal driver |
| TAF11    | 15.12780359 | 7.167835226 | 7.314782305 | 16.0305432  | Oncofetal driver |
| DYRK2    | 4.258510687 | 1.518207817 | 1.658336278 | 8.837734271 | Oncofetal driver |
| TROVE2   | 11.99984258 | 3.68524753  | 6.043549121 | 10.30734779 | Oncofetal driver |
| SCNM1    | 5.301886561 | 2.556241991 | 2.623944479 | 10.14053796 | Oncofetal driver |
| CKAP2L   | 2.333738447 | 0.082771275 | 0.405418967 | 5.854320151 | Oncofetal driver |
| ANTXR1   | 9.057547425 | 3.074219924 | 3.269561024 | 6.798545374 | Oncofetal driver |
| RCN2     | 14.61971773 | 3.312366272 | 4.749042103 | 20.73667995 | Oncofetal driver |
| FAM189B  | 5.130158936 | 1.11067319  | 0.837761187 | 2.283550273 | Oncofetal driver |
| ZNF621   | 4.098514666 | 1.618459761 | 1.830488825 | 4.401490752 | Oncofetal driver |
| PTPRA    | 42.96485319 | 9.937132173 | 8.767855693 | 23.94781978 | Oncofetal driver |
| CYTH2    | 4.902340663 | 1.154183263 | 1.811958646 | 4.557783294 | Oncofetal driver |
| KIAA1522 | 13.21555759 | 1.346283644 | 1.947232069 | 5.690285169 | Oncofetal driver |
| C15orf39 | 5.193503737 | 0.673147762 | 0.710427621 | 2.844970265 | Oncofetal driver |
| PDGFB    | 3.895363109 | 0.542018702 | 0.851601514 | 2.040561486 | Oncofetal driver |
| DBF4     | 2.802005528 | 0.916563843 | 1.865028785 | 6.185654467 | Oncofetal driver |
| KIF5B    | 58.01448937 | 19.47705964 | 29.86251846 | 79.73373362 | Oncofetal driver |
| CTF1     | 2.381576143 | 0.618727035 | 0.521784125 | 2.151421773 | Oncofetal driver |
| GOLPH3L  | 11.74872426 | 5.457695007 | 5.674488745 | 27.76912699 | Oncofetal driver |
| STK39    | 23.65302186 | 0.518780839 | 0.663288191 | 3.608836523 | Oncofetal driver |
| KRAS     | 10.94328098 | 3.30215517  | 3.931812262 | 8.187541684 | Oncofetal driver |
| NARF     | 3.46848187  | 1.547339288 | 1.660905928 | 3.804779349 | Oncofetal driver |
| FOXK2    | 2.816638538 | 0.867671929 | 1.079529511 | 3.372678249 | Oncofetal driver |
| PTPLB    | 45.09135404 | 13.64539748 | 16.72351113 | 67.57595285 | Oncofetal driver |
| OSBPL3   | 3.143487909 | 0.683832397 | 1.241035985 | 3.9473543   | Oncofetal driver |

|            |             |             |             |             |                  |
|------------|-------------|-------------|-------------|-------------|------------------|
| ZBTB41     | 2.583579921 | 0.894093131 | 1.132277655 | 3.232567831 | Oncofetal driver |
| FLNB       | 46.044029   | 7.921635475 | 7.183562122 | 24.46220203 | Oncofetal driver |
| AC005035.1 | 26.89322039 | 9.526728375 | 8.909170891 | 19.26717722 | Oncofetal driver |
| SERAC1     | 3.3218859   | 0.98172761  | 1.01376652  | 4.506524733 | Oncofetal driver |
| BARD1      | 3.58984897  | 0.292122447 | 0.68112922  | 4.421807021 | Oncofetal driver |
| C12orf35   | 51.47925809 | 19.11600573 | 19.46865961 | 47.74006211 | Oncofetal driver |
| PKDCC      | 12.1511832  | 1.064973466 | 1.327259288 | 4.155724667 | Oncofetal driver |
| KIF11      | 2.128924224 | 0.70785022  | 0.548091726 | 9.225339079 | Oncofetal driver |
| TUBB6      | 21.43541636 | 1.408549687 | 2.837656946 | 5.06996016  | Oncofetal driver |
| ERI1       | 4.320053417 | 0.864554469 | 1.203067231 | 2.488813783 | Oncofetal driver |
| SYF2       | 41.72769412 | 18.68486614 | 20.31352909 | 45.52638298 | Oncofetal driver |
| SLC29A1    | 21.57500287 | 10.46656171 | 10.37503483 | 73.39425288 | Oncofetal driver |
| ILF2       | 56.11561261 | 17.68435691 | 23.3943625  | 85.80119779 | Oncofetal driver |
| RIT1       | 8.914630278 | 2.018433665 | 3.180618994 | 10.34383003 | Oncofetal driver |
| B4GALT5    | 25.7126588  | 5.027889625 | 7.853424461 | 14.04465629 | Oncofetal driver |
| CD2AP      | 23.60948339 | 6.884079257 | 9.128480118 | 44.08671445 | Oncofetal driver |
| LMNB1      | 4.463436369 | 1.501149236 | 2.860987894 | 26.76972386 | Oncofetal driver |
| UNC45A     | 3.274923906 | 1.359456585 | 1.307808224 | 2.836240535 | Oncofetal driver |
| BCL9L      | 9.028113193 | 1.326083359 | 1.288116442 | 4.39678287  | Oncofetal driver |
| PTPN12     | 27.1883763  | 9.115181568 | 14.02664743 | 32.29953944 | Oncofetal driver |
| HIP1       | 10.23466635 | 3.52578626  | 3.892071695 | 8.639521583 | Oncofetal driver |
| NFKBIL1    | 5.107235005 | 1.94453491  | 1.7461502   | 5.496223539 | Oncofetal driver |
| RASEF      | 3.110938151 | 0.789707492 | 0.94310207  | 12.82789682 | Oncofetal driver |
| GJA1       | 135.4354795 | 2.881552581 | 3.805517301 | 11.21317911 | Oncofetal driver |
| PACSIN2    | 23.60779394 | 5.231576709 | 7.229650446 | 12.71416049 | Oncofetal driver |
| PLXNA3     | 5.264851803 | 0.679399358 | 0.621332698 | 2.474603542 | Oncofetal driver |
| DUSP9      | 18.34874929 | 0.014254923 | 0.086821539 | 3.640065638 | Oncofetal driver |
| MEGF8      | 6.20606866  | 2.03754952  | 2.460396743 | 9.070534453 | Oncofetal driver |
| DSC2       | 25.26970242 | 3.330299154 | 4.531627543 | 8.818323319 | Oncofetal driver |
| IGBP1      | 28.92150088 | 8.039650045 | 9.191271892 | 19.61098361 | Oncofetal driver |
| BTG3       | 20.29907703 | 3.625343326 | 4.016184028 | 17.10613552 | Oncofetal driver |
| REXO4      | 15.54016005 | 5.474622507 | 4.788341379 | 11.44996767 | Oncofetal driver |
| BACH1      | 15.04742329 | 5.093038155 | 4.743301519 | 17.16828651 | Oncofetal driver |
| FBXO5      | 2.300758477 | 0.570931464 | 0.671241831 | 4.266601966 | Oncofetal driver |
| MKL2       | 4.060489401 | 1.042106815 | 1.255801448 | 3.579317991 | Oncofetal driver |
| CAP2       | 3.910477758 | 1.098350215 | 2.307690839 | 8.440529833 | Oncofetal driver |
| MAD2L1     | 3.991087365 | 0.542995358 | 1.406676762 | 4.234318427 | Oncofetal driver |
| PRC1       | 2.460118074 | 0.089478482 | 0.747601907 | 12.51011054 | Oncofetal driver |
| MORF4L2    | 105.4281029 | 23.67575283 | 33.83203943 | 71.72995143 | Oncofetal driver |
| COPA       | 55.42763138 | 19.99319118 | 23.70005864 | 61.91123515 | Oncofetal driver |
| MED28      | 15.94034301 | 4.487930952 | 4.226667727 | 9.72852739  | Oncofetal driver |
| CCNK       | 7.399629782 | 2.29209011  | 2.896509868 | 5.618194552 | Oncofetal driver |
| MARK2      | 4.250044891 | 1.754934864 | 2.129903223 | 3.886529463 | Oncofetal driver |
| HMG2P42    | 3.085915155 | 1.325950786 | 1.534783205 | 3.135860221 | Oncofetal driver |



|          |             |             |             |             |                  |
|----------|-------------|-------------|-------------|-------------|------------------|
| CWF19L1  | 3.855211347 | 1.589498899 | 1.847234952 | 3.645015335 | Oncofetal driver |
| C1QL1    | 14.47095454 | 0           | 0.295847734 | 3.744047598 | Oncofetal driver |
| VGLL4    | 3.791163221 | 1.029869211 | 0.898754589 | 2.224784678 | Oncofetal driver |
| SPICE1   | 3.162957814 | 0.980164603 | 1.564740565 | 3.113479287 | Oncofetal driver |
| BICC1    | 4.386147015 | 1.928370638 | 2.068413259 | 13.63202689 | Oncofetal driver |
| YWHAG    | 40.16718952 | 13.81179818 | 21.25734748 | 46.95419137 | Oncofetal driver |
| SCTR     | 2.633073789 | 0.454427272 | 0.093145463 | 3.441087846 | Oncofetal driver |
| DNM1L    | 11.31331373 | 4.270732357 | 5.666929396 | 12.76957467 | Oncofetal driver |
| BCORL1   | 3.850950835 | 0.88586607  | 1.129288064 | 7.628022492 | Oncofetal driver |
| VEZFI    | 13.18115798 | 5.920347152 | 6.529692888 | 23.84183618 | Oncofetal driver |
| CCNE1    | 9.448329464 | 0.380313061 | 0.144241467 | 7.300831812 | Oncofetal driver |
| HNRNPUL1 | 49.7882896  | 21.935323   | 21.49949371 | 127.6149633 | Oncofetal driver |
| CCDC9    | 8.786407977 | 2.271383904 | 3.764084326 | 15.66019494 | Oncofetal driver |
| CORO2A   | 12.54014009 | 1.797275955 | 1.086724228 | 2.896159169 | Oncofetal driver |
| PODXL    | 19.1004899  | 1.446887064 | 2.053253191 | 7.519981216 | Oncofetal driver |
| DLGAP5   | 2.040911971 | 0.056152811 | 0.599826449 | 5.387765593 | Oncofetal driver |
| B4GALT4  | 12.77230895 | 2.201778041 | 3.154076915 | 6.645108024 | Oncofetal driver |
| ABCC4    | 4.415122398 | 0.474475947 | 1.039775964 | 10.32256005 | Oncofetal driver |
| RIOK1    | 16.04340439 | 6.164012182 | 8.48191412  | 19.34033132 | Oncofetal driver |
| SSR1     | 29.72354155 | 10.51683403 | 13.18802995 | 43.11027892 | Oncofetal driver |
| FARP1    | 17.60134262 | 8.695032173 | 8.351615475 | 50.91939774 | Oncofetal driver |
| VN1R1    | 2.544992673 | 0.940955175 | 0.734745523 | 3.749012199 | Oncofetal driver |
| WDR45L   | 23.0707812  | 7.540043127 | 8.737505805 | 18.21820556 | Oncofetal driver |
| GPC4     | 16.14820533 | 0.91208954  | 0.675323687 | 7.548227343 | Oncofetal driver |
| FAM60A   | 15.00929031 | 1.078281482 | 1.661575614 | 4.433695504 | Oncofetal driver |
| SYNGAP1  | 4.395624355 | 0.593532526 | 0.8138815   | 2.299770654 | Oncofetal driver |
| ZNF608   | 6.914058359 | 1.731806243 | 1.472175203 | 7.527240295 | Oncofetal driver |
| NEDD1    | 5.640242837 | 2.030049994 | 2.576093881 | 4.738776916 | Oncofetal driver |
| ATF1     | 12.42734645 | 5.431953227 | 6.97780186  | 16.80113892 | Oncofetal driver |
| PGS1     | 6.141762142 | 1.076966733 | 1.725026145 | 4.350930757 | Oncofetal driver |
| ATXN7L3  | 11.27430945 | 3.596199765 | 4.186776437 | 7.99497628  | Oncofetal driver |
| PHIP     | 16.38360332 | 8.233612051 | 7.944627731 | 23.3300147  | Oncofetal driver |
| ACTG1    | 316.9103261 | 56.76428025 | 75.32343472 | 145.8872165 | Oncofetal driver |
| ZNF518B  | 3.39601031  | 0.662771549 | 0.868735347 | 3.250037756 | Oncofetal driver |
| LDOC1L   | 2.31936928  | 0.914333307 | 1.183297302 | 2.675201946 | Oncofetal driver |
| C16orf87 | 3.958970745 | 1.75950906  | 2.182708515 | 4.022230856 | Oncofetal driver |
| KRT19    | 107.3349567 | 0.738037123 | 1.184289959 | 2.135228276 | Oncofetal driver |
| MFSD6    | 3.42513869  | 1.235952137 | 1.132519279 | 15.78960224 | Oncofetal driver |
| ARID5B   | 22.76892291 | 4.562658679 | 5.015035986 | 11.8095241  | Oncofetal driver |
| TUFT1    | 13.11723897 | 0.594618707 | 0.955834969 | 7.992984453 | Oncofetal driver |
| RPL13A   | 424.2400822 | 143.7914118 | 130.4894791 | 463.0033802 | Oncofetal driver |
| ZNF28    | 6.275804152 | 1.409694356 | 1.93755546  | 4.708302412 | Oncofetal driver |
| ATP11A   | 10.78935506 | 1.503509332 | 2.557903512 | 8.694845444 | Oncofetal driver |
| NUP188   | 3.525451819 | 1.569758427 | 1.706047854 | 3.506060306 | Oncofetal driver |

|          |             |             |             |             |                  |
|----------|-------------|-------------|-------------|-------------|------------------|
| MAPK8IP3 | 6.228105677 | 1.521569194 | 1.767169783 | 3.554730292 | Oncofetal driver |
| F2RL1    | 44.90687134 | 0.348060104 | 1.428491351 | 2.322197241 | Oncofetal driver |
| CTNNA1   | 34.3769855  | 6.646579769 | 8.398528777 | 15.99629187 | Oncofetal driver |
| TES      | 19.04429546 | 1.876304191 | 2.772445496 | 4.89840535  | Oncofetal driver |
| PLEKHG2  | 3.672888611 | 0.598170946 | 0.966967145 | 3.569943197 | Oncofetal driver |
| EZR      | 193.8316703 | 15.40021978 | 32.62005825 | 80.20985344 | Oncofetal driver |
| ADNP2    | 4.698008869 | 1.652749789 | 2.049602123 | 3.960105593 | Oncofetal driver |
| SIPA1L3  | 5.435215917 | 0.997106465 | 1.234953723 | 11.71437938 | Oncofetal driver |
| HSPA4    | 48.68414455 | 14.15998946 | 20.38222208 | 34.95023704 | Oncofetal driver |
| UBE2Q2   | 39.58387727 | 3.449672793 | 3.737793004 | 18.53927456 | Oncofetal driver |
| CSNK2A1  | 40.2811185  | 13.46584836 | 13.28381005 | 33.62377904 | Oncofetal driver |
| RAB3B    | 9.329432897 | 0.060920816 | 0.094639388 | 2.341304343 | Oncofetal driver |
| LAPTM4B  | 30.12140346 | 8.926947994 | 7.236160933 | 32.34090965 | Oncofetal driver |
| MAML1    | 2.777132821 | 1.198105578 | 1.523338476 | 2.909350155 | Oncofetal driver |
| TJP1     | 19.41544574 | 5.845078293 | 7.054202352 | 16.28781853 | Oncofetal driver |
| PRKCI    | 18.2548592  | 3.133985375 | 3.23390424  | 6.864512465 | Oncofetal driver |
| SGMS2    | 6.413064181 | 1.96877565  | 2.605441306 | 5.02297105  | Oncofetal driver |
| KPNA2    | 10.53202221 | 1.482044356 | 4.375039876 | 19.52449518 | Oncofetal driver |
| DHX40    | 10.32892277 | 3.944512821 | 4.038145474 | 13.1450034  | Oncofetal driver |
| ARHGEF17 | 5.402250057 | 1.383686142 | 0.887959876 | 2.345611327 | Oncofetal driver |
| UBE2J1   | 48.66975025 | 14.44266395 | 15.65141554 | 33.86989817 | Oncofetal driver |
| ATXN2L   | 19.71715676 | 4.499191337 | 5.54106733  | 11.78905082 | Oncofetal driver |
| FLT1     | 13.15299346 | 2.369828791 | 2.732100982 | 6.749579409 | Oncofetal driver |
| TPR      | 40.35428775 | 14.86088497 | 17.42562612 | 42.7648546  | Oncofetal driver |
| ZNF852   | 3.059039127 | 0.55559784  | 0.611941287 | 3.082159931 | Oncofetal driver |
| 42256    | 29.0200858  | 7.480652863 | 9.787107815 | 19.664125   | Oncofetal driver |
| DDOST    | 34.52779613 | 12.04032657 | 15.5773338  | 29.06407329 | Oncofetal driver |
| TCP1     | 32.80174018 | 13.15098602 | 16.58169045 | 45.59390445 | Oncofetal driver |
| TPM1     | 120.3864921 | 5.652400376 | 6.144850023 | 22.13345593 | Oncofetal driver |
| BTAF1    | 21.83608061 | 7.406726266 | 8.868944387 | 19.5258139  | Oncofetal driver |
| GNL3     | 43.4761531  | 12.01465714 | 15.58439985 | 31.28963505 | Oncofetal driver |
| SERPINI1 | 3.95977715  | 0.93058173  | 0.871974494 | 2.950824342 | Oncofetal driver |
| FBL      | 67.34445    | 31.50600589 | 29.78700011 | 221.594964  | Oncofetal driver |
| KHDRBS1  | 34.30104637 | 15.3745598  | 16.10556862 | 37.31625476 | Oncofetal driver |
| B3GNT5   | 2.783684893 | 0.065770532 | 0.317623088 | 3.413941617 | Oncofetal driver |
| CDK2     | 7.180670139 | 1.433031558 | 1.957189236 | 3.924493873 | Oncofetal driver |
| ZNF404   | 2.880138233 | 1.252698752 | 0.75458884  | 3.573159812 | Oncofetal driver |
| CHML     | 10.2029798  | 1.140401866 | 1.172167208 | 9.511971236 | Oncofetal driver |
| MTMR2    | 9.193406593 | 1.521039149 | 1.936063459 | 3.908914317 | Oncofetal driver |
| CAMSAP2  | 15.0563482  | 2.803924219 | 3.329446855 | 12.51514993 | Oncofetal driver |
| DUSP12   | 7.828805087 | 3.482513196 | 3.077032519 | 11.41596652 | Oncofetal driver |
| SUPT5H   | 41.66379157 | 11.54195754 | 13.58993758 | 74.00000504 | Oncofetal driver |
| MCM8     | 3.4449957   | 1.066331851 | 1.343718357 | 13.89862372 | Oncofetal driver |
| AURKA    | 2.315508162 | 0.450081656 | 1.541971885 | 6.434279435 | Oncofetal driver |

|          |             |             |             |             |                  |
|----------|-------------|-------------|-------------|-------------|------------------|
| ZNF318   | 6.984361379 | 3.122817296 | 3.529990522 | 12.98645448 | Oncofetal driver |
| CERS6    | 30.95104063 | 2.947294864 | 2.356488672 | 7.369645051 | Oncofetal driver |
| MAP7D2   | 3.745946268 | 0.023006967 | 0.194022075 | 11.09989406 | Oncofetal driver |
| ANKRD52  | 10.80230417 | 1.505821661 | 1.725997206 | 4.185759369 | Oncofetal driver |
| ZNF613   | 4.685822968 | 1.267412951 | 1.607208346 | 3.801051123 | Oncofetal driver |
| LGI4     | 42.99805701 | 4.01612288  | 3.70405506  | 8.441198341 | Oncofetal driver |
| PAG1     | 4.759542745 | 1.804607637 | 2.297215326 | 8.12319523  | Oncofetal driver |
| DMWD     | 3.889466337 | 1.357237761 | 1.308096097 | 4.821685214 | Oncofetal driver |
| HN1L     | 21.69688656 | 8.239949201 | 7.146380282 | 21.09367975 | Oncofetal driver |
| THOC2    | 32.79321174 | 11.05139731 | 12.7904072  | 43.82064398 | Oncofetal driver |
| MZT1     | 4.3664786   | 1.047922828 | 1.384766801 | 5.742115703 | Oncofetal driver |
| RBFOX2   | 27.50877236 | 7.579318448 | 6.344768984 | 22.68536117 | Oncofetal driver |
| MCM6     | 9.368627163 | 1.270076221 | 4.263700792 | 19.53854591 | Oncofetal driver |
| ITPR3    | 4.91169545  | 0.666638062 | 0.542830114 | 4.431911051 | Oncofetal driver |
| C22orf23 | 4.199856934 | 0.428045382 | 0.707180508 | 2.227686615 | Oncofetal driver |
| HIC2     | 7.698830166 | 0.561916254 | 0.526527252 | 2.417555538 | Oncofetal driver |
| PBX2     | 25.11472408 | 8.331543709 | 9.568391652 | 22.41134655 | Oncofetal driver |
| MTX3     | 5.008039358 | 1.197606175 | 1.620051433 | 4.380564374 | Oncofetal driver |
| CRMP1    | 2.821863926 | 1.20230468  | 0.82505752  | 4.084560878 | Oncofetal driver |
| VIL1     | 8.256962046 | 2.52034345  | 1.480539835 | 9.761485589 | Oncofetal driver |
| RUSC1    | 2.2059475   | 0.65260596  | 1.319002924 | 2.918988171 | Oncofetal driver |
| TRIM28   | 33.23945356 | 12.67902383 | 11.86746865 | 38.46587991 | Oncofetal driver |
| UBE2M    | 22.32153423 | 9.558768003 | 11.37648513 | 38.27072796 | Oncofetal driver |
| PRRC2B   | 15.34252783 | 4.623103444 | 4.503024779 | 9.162505081 | Oncofetal driver |
| YWHAZ    | 57.16143576 | 12.22236062 | 21.93316301 | 38.89891277 | Oncofetal driver |
| PRRC2C   | 81.56273121 | 33.42883818 | 35.48911166 | 127.4410575 | Oncofetal driver |
| 42069    | 19.55665342 | 8.152528138 | 9.892696404 | 28.41848963 | Oncofetal driver |
| HUNK     | 2.424003488 | 0.188682652 | 0.097705032 | 3.844233263 | Oncofetal driver |
| STRN4    | 9.94337805  | 2.864867581 | 3.560029738 | 15.49818768 | Oncofetal driver |
| TEAD2    | 4.163675398 | 1.412248726 | 1.832855578 | 13.45838554 | Oncofetal driver |
| ZNF629   | 3.236820511 | 1.087314801 | 1.079141623 | 3.467190135 | Oncofetal driver |
| TLN2     | 9.800880839 | 0.414315693 | 0.289380535 | 3.203894862 | Oncofetal driver |
| ZNF346   | 2.489948251 | 1.072185557 | 1.140536412 | 3.413993237 | Oncofetal driver |
| CSNK1D   | 8.600040391 | 2.060244287 | 3.038380684 | 11.42486147 | Oncofetal driver |
| PEAK1    | 3.116772773 | 1.264233611 | 1.537918977 | 5.563236053 | Oncofetal driver |
| PPP6R1   | 21.7831742  | 7.124250429 | 11.09057548 | 23.3286071  | Oncofetal driver |
| PGM3     | 32.23261153 | 5.052821174 | 6.922651052 | 17.53800214 | Oncofetal driver |
| CBX1     | 29.21318781 | 8.704749803 | 9.762837716 | 46.35139595 | Oncofetal driver |
| RUSC2    | 4.209035171 | 1.746739815 | 1.928762601 | 4.008717459 | Oncofetal driver |
| CBX6     | 5.091652532 | 1.600115953 | 1.624287196 | 6.411504808 | Oncofetal driver |
| BEX4     | 30.76683246 | 4.992754449 | 6.102150092 | 16.79793832 | Oncofetal driver |
| FBXW11   | 12.39441682 | 4.618905489 | 5.01647934  | 9.648800681 | Oncofetal driver |
| PDGFRB   | 10.24566101 | 3.402694544 | 3.122778645 | 6.675427089 | Oncofetal driver |
| MSH6     | 21.91582915 | 5.352932356 | 8.109569319 | 20.88742037 | Oncofetal driver |

|          |             |             |             |             |                  |
|----------|-------------|-------------|-------------|-------------|------------------|
| BTN2A1   | 7.623371481 | 2.847548987 | 3.3468334   | 7.893476486 | Oncofetal driver |
| PDK1     | 4.279814028 | 1.607166155 | 2.615823342 | 5.037229161 | Oncofetal driver |
| C10orf47 | 10.44942044 | 3.400954852 | 2.823316337 | 6.474822176 | Oncofetal driver |
| AKAP7    | 11.25959195 | 3.870814912 | 5.03657187  | 16.37626609 | Oncofetal driver |
| NAV2     | 16.9833676  | 2.747475716 | 3.178013052 | 12.92571014 | Oncofetal driver |
| SF3A1    | 17.81071851 | 7.905185967 | 9.380374272 | 23.82470938 | Oncofetal driver |
| FAM161A  | 2.363583071 | 0.666509915 | 0.973537818 | 3.139797717 | Oncofetal driver |
| METTL6   | 2.600121534 | 1.089199283 | 0.955916379 | 2.450432935 | Oncofetal driver |
| WAC      | 21.57322046 | 10.90219394 | 10.28378808 | 33.41937123 | Oncofetal driver |
| PM20D2   | 6.097529802 | 1.683862736 | 1.446671485 | 13.7394876  | Oncofetal driver |
| ZNF611   | 7.43291085  | 1.336923008 | 1.416479616 | 4.861400662 | Oncofetal driver |
| MPP6     | 9.624137167 | 3.562860128 | 2.741149211 | 7.273228927 | Oncofetal driver |
| TMEM51   | 9.454181982 | 2.133616209 | 2.05956488  | 5.506256065 | Oncofetal driver |
| SEC23IP  | 15.66900943 | 5.350678253 | 5.994711679 | 12.68718098 | Oncofetal driver |
| DPY19L3  | 9.785153957 | 3.029591677 | 2.907420703 | 9.586610198 | Oncofetal driver |
| CCDC117  | 21.23644286 | 10.70553599 | 9.691871719 | 27.51787972 | Oncofetal driver |
| RCOR1    | 9.75990602  | 2.696352753 | 3.288856511 | 9.287647203 | Oncofetal driver |
| NES      | 6.618378104 | 2.230284979 | 2.603600769 | 8.429795396 | Oncofetal driver |
| WASF3    | 4.336116191 | 1.479920275 | 1.932431967 | 7.2559846   | Oncofetal driver |
| MAPK13   | 2.677916146 | 0.714451204 | 0.993613169 | 4.347474941 | Oncofetal driver |
| C1orf116 | 3.16217467  | 0.27694501  | 0.35068007  | 3.277731347 | Oncofetal driver |
| PUS7L    | 3.721304537 | 1.368714291 | 1.801626588 | 12.49507631 | Oncofetal driver |
| ZBED4    | 5.534296911 | 1.323918143 | 1.501125495 | 5.188294593 | Oncofetal driver |
| NRAS     | 34.71128162 | 7.002593768 | 11.30603422 | 19.26675812 | Oncofetal driver |
| PCNP     | 55.02788769 | 13.81378516 | 21.05467537 | 37.7962221  | Oncofetal driver |
| PCID2    | 5.851916408 | 2.574311795 | 2.78775172  | 7.694320453 | Oncofetal driver |
| FAM219B  | 4.782172751 | 1.589966092 | 1.52652675  | 3.685158817 | Oncofetal driver |
| FAM127B  | 10.93737474 | 4.297301372 | 2.77595571  | 10.82479787 | Oncofetal driver |
| C10orf88 | 4.351768902 | 1.531525885 | 1.581011198 | 3.955958145 | Oncofetal driver |
| MSI2     | 5.33136179  | 0.865999994 | 1.208653134 | 4.111058289 | Oncofetal driver |
| JOSD1    | 14.42419957 | 4.455246568 | 6.939924532 | 11.54944478 | Oncofetal driver |
| GTPBP1   | 4.198587809 | 1.001067914 | 1.493273551 | 2.496134025 | Oncofetal driver |
| RIMKLB   | 5.789061323 | 1.11733521  | 1.193631952 | 5.620517048 | Oncofetal driver |
| CBX3     | 31.69974422 | 13.5263274  | 16.76462934 | 30.3129544  | Oncofetal driver |
| RPS19    | 241.8303257 | 77.50278576 | 90.0026485  | 234.6314678 | Oncofetal driver |
| GLTSCR2  | 324.9635878 | 78.50915966 | 70.85183905 | 281.7135563 | Oncofetal driver |
| MSH2     | 4.437904672 | 1.415873635 | 2.399086175 | 11.90503795 | Oncofetal driver |
| ADAM10   | 33.10633712 | 6.246270422 | 8.754755345 | 35.31988403 | Oncofetal driver |
| CASP2    | 3.395224052 | 1.137396189 | 1.515646257 | 3.478972406 | Oncofetal driver |
| LRRC1    | 25.01405859 | 0.150012837 | 0.503075301 | 3.397398555 | Oncofetal driver |
| SLC22A23 | 3.788011375 | 1.506506458 | 1.452827566 | 7.176628513 | Oncofetal driver |
| 42066    | 3.516695624 | 0.210723208 | 0.212354083 | 2.488487544 | Oncofetal driver |
| AFP      | 31679.25128 | 2.647354334 | 1.941874476 | 9.055643854 | Oncofetal driver |
| STXBP1   | 5.807969476 | 1.205754835 | 1.420228252 | 3.801407016 | Oncofetal driver |

|          |             |             |             |             |                  |
|----------|-------------|-------------|-------------|-------------|------------------|
| POFUT2   | 9.068261433 | 1.445061597 | 1.882300644 | 3.943018162 | Oncofetal driver |
| RAB34    | 12.87461807 | 1.076585042 | 1.362436327 | 5.035671588 | Oncofetal driver |
| TAF12    | 13.2173128  | 6.528928405 | 6.315887606 | 13.20275161 | Oncofetal driver |
| PPRC1    | 3.793651844 | 1.034154248 | 1.871109042 | 3.341616875 | Oncofetal driver |
| R3HDM1   | 6.440778866 | 2.641038466 | 3.398143156 | 6.657476341 | Oncofetal driver |
| SOGA1    | 3.96318367  | 0.574398564 | 0.506338162 | 2.672609671 | Oncofetal driver |
| RNMT     | 12.69061149 | 3.230966452 | 4.190949916 | 9.695025028 | Oncofetal driver |
| JRKL     | 4.05161424  | 1.23761805  | 1.812561221 | 7.687692834 | Oncofetal driver |
| OCLN     | 25.33300554 | 5.381557987 | 7.545398564 | 17.33458533 | Oncofetal driver |
| BUB3     | 19.6021592  | 8.293067157 | 10.96342171 | 19.97873532 | Oncofetal driver |
| ZNF701   | 3.773261113 | 0.801730557 | 0.823605245 | 2.673465285 | Oncofetal driver |
| COL5A1   | 149.7752376 | 1.076870455 | 1.683475006 | 4.836602326 | Oncofetal driver |
| CENPE    | 3.510525064 | 0.422988112 | 1.184959986 | 5.264376904 | Oncofetal driver |
| PHC3     | 5.589018246 | 2.147416095 | 2.165996872 | 4.676479821 | Oncofetal driver |
| SRI      | 4.181230299 | 1.837027876 | 2.290557462 | 4.742166209 | Oncofetal driver |
| CLSTN1   | 14.48627541 | 4.707943987 | 4.484329434 | 12.01452375 | Oncofetal driver |
| FOXO4    | 11.79722635 | 2.311809757 | 3.296899294 | 5.777069897 | Oncofetal driver |
| PTP4A3   | 5.983774069 | 0.604066103 | 1.012882439 | 7.761505951 | Oncofetal driver |
| KIAA1586 | 7.81027008  | 2.515368628 | 2.927385621 | 9.72627169  | Oncofetal driver |
| COMP     | 2.80172076  | 0           | 0.018672017 | 2.08590751  | Oncofetal driver |
| MLL4     | 5.342308058 | 2.572081159 | 2.574107639 | 6.942259596 | Oncofetal driver |
| MTMR1    | 4.821517338 | 2.100748308 | 2.212215265 | 5.063655871 | Oncofetal driver |
| ARMCX3   | 40.45377988 | 7.679816868 | 11.6476561  | 36.51539812 | Oncofetal driver |
| MARK4    | 9.143660328 | 3.04450445  | 3.661112765 | 17.05525719 | Oncofetal driver |
| RASSF8   | 9.795363762 | 2.174045113 | 2.113137773 | 9.581638686 | Oncofetal driver |
| TCEAL8   | 77.7415381  | 20.49013311 | 24.56801434 | 101.5287977 | Oncofetal driver |
| TPM3     | 38.82730535 | 14.79033279 | 21.1216539  | 58.85186864 | Oncofetal driver |
| COL1A1   | 220.0038718 | 5.060255814 | 6.437367503 | 30.59414225 | Oncofetal driver |
| LRRC59   | 28.84002477 | 8.218471333 | 12.24372222 | 23.60368609 | Oncofetal driver |
| AZIN1    | 31.02487332 | 10.73601216 | 13.28910879 | 26.16134231 | Oncofetal driver |
| KDEL3    | 60.1503325  | 3.319789692 | 3.690845014 | 14.77733433 | Oncofetal driver |
| VCAN     | 24.62584479 | 0.671981532 | 1.00693676  | 4.673797344 | Oncofetal driver |
| TMEM65   | 8.880342571 | 1.403367987 | 1.763275447 | 9.57929209  | Oncofetal driver |
| SYNJ2    | 3.335532148 | 1.140405945 | 1.410608385 | 13.23440047 | Oncofetal driver |
| AHNAK    | 113.148334  | 23.10653438 | 20.1225932  | 65.05669958 | Oncofetal driver |
| GPRC5B   | 13.9789431  | 1.249600058 | 1.31408219  | 6.534588851 | Oncofetal driver |
| NPEPPS   | 15.44231448 | 4.528748817 | 4.789679555 | 10.96106148 | Oncofetal driver |
| DOCK7    | 4.221312692 | 1.759335786 | 2.21283349  | 4.879115116 | Oncofetal driver |
| ZNF471   | 2.652101317 | 0.775228726 | 1.534385924 | 4.369547584 | Oncofetal driver |
| ZBTB34   | 5.670836433 | 0.801081984 | 0.966765391 | 3.827355235 | Oncofetal driver |
| SPATS2   | 7.184276198 | 1.557118265 | 1.709738888 | 6.297604126 | Oncofetal driver |
| MECP2    | 4.030591096 | 1.92415581  | 1.958626576 | 5.831734255 | Oncofetal driver |
| RALGAPB  | 8.087575665 | 2.663615967 | 3.507659063 | 9.606411797 | Oncofetal driver |
| HN1      | 4.460300105 | 1.363618561 | 2.778663933 | 7.111015125 | Oncofetal driver |

|          |             |             |             |             |                  |
|----------|-------------|-------------|-------------|-------------|------------------|
| JMJD6    | 3.294478659 | 1.349252826 | 1.838040112 | 4.467994181 | Oncofetal driver |
| SF3A2    | 26.04207767 | 6.480807368 | 6.739590322 | 13.85364279 | Oncofetal driver |
| VPS33B   | 2.137465348 | 1.104920414 | 0.968537769 | 2.716622192 | Oncofetal driver |
| MAPRE1   | 33.99661261 | 6.40581333  | 10.98229707 | 32.03100385 | Oncofetal driver |
| CMTM4    | 13.02393665 | 0.900565318 | 0.720242513 | 2.762047064 | Oncofetal driver |
| LHFP     | 12.79940137 | 5.875625497 | 3.067870413 | 11.04797148 | Oncofetal driver |
| UBR5     | 8.246748958 | 3.695292035 | 3.945795277 | 13.86564844 | Oncofetal driver |
| KIAA0355 | 6.531139066 | 2.092091735 | 2.959266477 | 8.888980699 | Oncofetal driver |
| UHRF2    | 5.223130008 | 2.034419904 | 2.330347019 | 6.42663238  | Oncofetal driver |
| VLDLR    | 11.92723137 | 0.91310047  | 0.537948441 | 2.477505562 | Oncofetal driver |
| KDM4C    | 3.543675941 | 1.406396163 | 1.856167071 | 3.732743873 | Oncofetal driver |
| RNF219   | 3.752345722 | 0.951082864 | 1.399651704 | 4.634731904 | Oncofetal driver |
| TRIP12   | 20.67779109 | 9.087128118 | 10.96378374 | 20.71209077 | Oncofetal driver |
| SLBP     | 25.77614582 | 7.683600306 | 10.72335342 | 34.31315966 | Oncofetal driver |
| GLS      | 12.92433914 | 2.110041151 | 3.357428901 | 7.404376261 | Oncofetal driver |
| SVIL     | 11.82278872 | 3.731190851 | 3.255536494 | 23.5127808  | Oncofetal driver |
| BTBD10   | 7.56979679  | 2.026719626 | 3.080482096 | 5.294405834 | Oncofetal driver |
| STK24    | 20.97300609 | 6.923491628 | 8.329221807 | 27.48157231 | Oncofetal driver |
| C1orf9   | 36.04171746 | 2.645943544 | 3.991948434 | 16.01560019 | Oncofetal driver |
| PTBP3    | 27.98172763 | 6.141774171 | 8.66965911  | 21.53870732 | Oncofetal driver |
| GAB2     | 7.830947403 | 1.827696452 | 1.991847258 | 4.656044026 | Oncofetal driver |
| MAD2L2   | 4.954383394 | 2.039155582 | 1.882382189 | 4.155411411 | Oncofetal driver |
| SLC26A3  | 3.678638266 | 0.194831326 | 0.09698554  | 2.467710037 | Oncofetal driver |
| MTF2     | 7.031221905 | 2.99527859  | 3.399911705 | 7.961023864 | Oncofetal driver |
| PHF16    | 8.29995913  | 3.132402632 | 2.694604071 | 7.169170958 | Oncofetal driver |
| THOC6    | 5.278281558 | 1.572019073 | 1.670108176 | 4.763664211 | Oncofetal driver |
| KIAA1958 | 3.195486092 | 1.136371269 | 1.248643982 | 3.530437376 | Oncofetal driver |
| SUN1     | 8.620245356 | 3.518908694 | 4.966189908 | 9.486924484 | Oncofetal driver |
| OLA1     | 13.05663649 | 4.712354933 | 7.701951877 | 13.16811202 | Oncofetal driver |
| FAM117B  | 2.54930556  | 0.985604513 | 0.920314107 | 2.492721372 | Oncofetal driver |
| KCNC3    | 2.578168984 | 1.167831755 | 1.367853395 | 12.50806526 | Oncofetal driver |
| SLC6A6   | 10.95360669 | 0.822453134 | 1.312450084 | 3.198332461 | Oncofetal driver |
| FAM126A  | 15.33818625 | 2.388857379 | 2.740795301 | 8.392567807 | Oncofetal driver |
| NCKAP1   | 41.16091123 | 10.58507738 | 12.11397058 | 24.40103227 | Oncofetal driver |
| ARID1B   | 4.647748201 | 2.336692654 | 2.207754147 | 6.432260494 | Oncofetal driver |
| USH1C    | 10.07736835 | 0.197346672 | 0.216393344 | 2.025775934 | Oncofetal driver |
| UEVLD    | 8.887486842 | 3.291028501 | 4.003480956 | 7.505791221 | Oncofetal driver |
| HGS      | 4.085235447 | 1.359610308 | 1.818640267 | 4.714048174 | Oncofetal driver |
| MED14    | 9.044804188 | 3.379982254 | 3.474833463 | 8.659338954 | Oncofetal driver |
| IPMK     | 6.970499233 | 1.836524694 | 2.334331931 | 5.465095401 | Oncofetal driver |
| NGRN     | 7.772051362 | 2.640470962 | 2.564272432 | 12.7545927  | Oncofetal driver |
| APPL1    | 12.80095574 | 3.065625347 | 3.367105785 | 7.710176141 | Oncofetal driver |
| LTN1     | 7.464124015 | 3.20607118  | 4.236685396 | 12.30159507 | Oncofetal driver |
| RUNDC1   | 4.534185096 | 1.839655858 | 2.283273536 | 4.64680126  | Oncofetal driver |

|          |             |             |             |             |                  |
|----------|-------------|-------------|-------------|-------------|------------------|
| CPSF6    | 11.21553134 | 4.373131707 | 5.278458844 | 545.3721939 | Oncofetal driver |
| PPP1CB   | 40.13956192 | 12.16527348 | 14.75219    | 30.56722127 | Oncofetal driver |
| METTL9   | 13.92789235 | 3.436263079 | 3.510569199 | 7.385110749 | Oncofetal driver |
| NACC2    | 3.944095288 | 1.658833606 | 2.126880457 | 3.999043223 | Oncofetal driver |
| LOX      | 143.8720657 | 0.621352212 | 0.405789686 | 2.369239457 | Oncofetal driver |
| CRKL     | 14.04154012 | 5.943423349 | 6.55466688  | 18.93348126 | Oncofetal driver |
| UBXN7    | 11.28891596 | 2.906955077 | 2.650397789 | 5.93701711  | Oncofetal driver |
| CKB      | 491.6719943 | 1.766726483 | 1.734979462 | 6.20357511  | Oncofetal driver |
| UBA2     | 35.26357039 | 12.56681065 | 12.97405345 | 64.99838295 | Oncofetal driver |
| DEDD2    | 5.971097395 | 3.393680082 | 2.546004208 | 6.296243562 | Oncofetal driver |
| LARP4B   | 15.72962334 | 3.331668395 | 4.322762943 | 14.2324165  | Oncofetal driver |
| C20orf20 | 7.537096158 | 2.164848745 | 4.092397829 | 10.84548023 | Oncofetal driver |
| HNRNPC   | 94.10692338 | 38.31686957 | 47.49882011 | 103.4195358 | Oncofetal driver |
| AXIN1    | 6.034500927 | 1.201865903 | 1.141635758 | 3.400895816 | Oncofetal driver |
| C17orf96 | 2.195099931 | 0.306284263 | 0.633780058 | 2.634774976 | Oncofetal driver |
| NSUN7    | 5.528522005 | 0.161141227 | 0.452978074 | 2.598087512 | Oncofetal driver |
| DLG3     | 3.40581389  | 0.653898444 | 0.664391367 | 2.091661582 | Oncofetal driver |
| CRTC3    | 3.462894148 | 1.549959857 | 1.409523744 | 3.730510446 | Oncofetal driver |
| MTMR3    | 4.961082491 | 2.194400459 | 2.06773988  | 4.539197529 | Oncofetal driver |
| ADARB1   | 7.161217893 | 0.958114414 | 1.242625985 | 3.780143651 | Oncofetal driver |
| IPO7     | 40.09227206 | 13.95770307 | 15.21715683 | 33.0912128  | Oncofetal driver |
| BCL10    | 6.080154884 | 2.161197631 | 2.66272407  | 4.977499922 | Oncofetal driver |
| RDH13    | 2.577742625 | 0.85694798  | 0.791507017 | 2.181608191 | Oncofetal driver |
| PDP1     | 6.111769331 | 1.040035644 | 1.277570742 | 2.400008326 | Oncofetal driver |
| VASH1    | 2.49607502  | 1.028635089 | 1.26487555  | 2.695312558 | Oncofetal driver |
| RAD21    | 39.56912781 | 11.08375141 | 14.62349823 | 46.04320557 | Oncofetal driver |
| HLTF     | 13.237407   | 4.867516549 | 5.316854737 | 17.33823093 | Oncofetal driver |
| DBN1     | 14.76305423 | 0.752209628 | 1.247597611 | 4.939149967 | Oncofetal driver |
| SMC5     | 19.92564971 | 8.587291614 | 10.76403652 | 21.01635393 | Oncofetal driver |
| CENPH    | 2.830550291 | 0.559743931 | 1.040385254 | 4.407154906 | Oncofetal driver |
| C1orf52  | 7.803208143 | 2.253767096 | 1.885962957 | 4.767001619 | Oncofetal driver |
| ODC1     | 37.172244   | 7.409514747 | 12.97562574 | 35.00206653 | Oncofetal driver |
| PSPC1    | 12.73438617 | 4.282874142 | 6.441515376 | 14.22706596 | Oncofetal driver |
| ZBTB45   | 2.162299525 | 0.613355958 | 0.550096157 | 3.408584488 | Oncofetal driver |
| LRIF1    | 7.657219208 | 3.252744226 | 3.831175403 | 8.502542432 | Oncofetal driver |
| TMEM117  | 3.030180267 | 1.291061515 | 1.349769115 | 5.851867224 | Oncofetal driver |
| MAP4K3   | 18.39875126 | 5.142720491 | 5.365564518 | 12.38538426 | Oncofetal driver |
| CPD      | 26.00375763 | 8.248977815 | 8.420529497 | 49.21881868 | Oncofetal driver |
| TMEM164  | 7.475663368 | 0.966533775 | 1.058071501 | 7.178421536 | Oncofetal driver |
| LAMC1    | 223.5739509 | 7.506430257 | 7.589214043 | 52.87956668 | Oncofetal driver |
| AAED1    | 6.196659278 | 1.682552337 | 3.153173277 | 4.955246155 | Oncofetal driver |
| SEC61G   | 9.565263647 | 2.414607448 | 3.268109793 | 8.041318472 | Oncofetal driver |
| ZNF622   | 20.13114719 | 8.083787074 | 10.60681924 | 25.90418183 | Oncofetal driver |
| CDKN2B   | 10.42587743 | 0.355196279 | 0.503994147 | 5.397958583 | Oncofetal driver |

|           |             |             |             |             |                  |
|-----------|-------------|-------------|-------------|-------------|------------------|
| SLC16A3   | 11.62219011 | 0.119037716 | 0.223081647 | 2.858102237 | Oncofetal driver |
| NFYA      | 11.05812454 | 4.479174607 | 4.824870064 | 9.793005455 | Oncofetal driver |
| AP3B1     | 12.4613474  | 3.974587364 | 5.154855984 | 10.34259964 | Oncofetal driver |
| PDGFA     | 10.35278996 | 0.650929508 | 1.666843977 | 6.700557427 | Oncofetal driver |
| TMF1      | 26.22530707 | 5.049797228 | 6.313589563 | 13.90873696 | Oncofetal driver |
| RAB23     | 10.51308358 | 1.766291102 | 2.233697471 | 4.711620622 | Oncofetal driver |
| ARID3A    | 57.72881805 | 0.974907861 | 1.570958665 | 3.988618674 | Oncofetal driver |
| ARMCX6    | 10.71562286 | 2.964078164 | 3.97215188  | 7.899100321 | Oncofetal driver |
| RBM12B    | 3.904277043 | 0.775752777 | 1.020694438 | 5.533486172 | Oncofetal driver |
| EEF1E1    | 2.260947385 | 0.742730857 | 1.080560635 | 3.493737418 | Oncofetal driver |
| MOSPD1    | 33.34606774 | 1.616508226 | 2.401884488 | 5.696160586 | Oncofetal driver |
| PAK4      | 11.07440729 | 3.694487428 | 4.416794352 | 23.89023925 | Oncofetal driver |
| LTBP2     | 3.46464749  | 0.721025011 | 1.407186835 | 2.802255746 | Oncofetal driver |
| ST20      | 2.977224677 | 0.408252505 | 1.028079244 | 4.810440456 | Oncofetal driver |
| HMGNI     | 38.86962624 | 10.79607127 | 19.03347764 | 78.43016087 | Oncofetal driver |
| HOMER1    | 2.968508171 | 0.324561239 | 0.909226691 | 2.137857398 | Oncofetal driver |
| NSD1      | 5.620295423 | 2.714425738 | 2.492630144 | 8.33763157  | Oncofetal driver |
| KDM6A     | 5.446158524 | 2.221009116 | 2.393018121 | 6.17484922  | Oncofetal driver |
| PROSER1   | 6.50862607  | 1.892960121 | 2.188939446 | 4.719238976 | Oncofetal driver |
| STAM      | 10.28487143 | 2.500760308 | 3.082027792 | 8.105254676 | Oncofetal driver |
| PFKP      | 37.91487705 | 0.57813687  | 0.708724643 | 4.926515149 | Oncofetal driver |
| PI3       | 2.369164835 | 0.178433585 | 0.167195992 | 3.257334595 | Oncofetal driver |
| CHD3      | 11.65019509 | 2.747467609 | 2.770186393 | 9.442444207 | Oncofetal driver |
| CERS5     | 5.893106818 | 2.001329408 | 2.531328542 | 4.704626308 | Oncofetal driver |
| TCEAL3    | 27.89188965 | 3.671582598 | 5.039149368 | 13.58018492 | Oncofetal driver |
| NT5DC2    | 16.93497946 | 0.361020821 | 0.419798267 | 3.384103738 | Oncofetal driver |
| CCDC97    | 6.35699688  | 2.971739054 | 2.842714711 | 19.16586859 | Oncofetal driver |
| CNTNAP2   | 6.980436163 | 1.326404786 | 1.448765919 | 3.370978206 | Oncofetal driver |
| OLFML2A   | 3.565641783 | 0.763090563 | 0.21736966  | 3.131010733 | Oncofetal driver |
| CSTF2     | 2.203284637 | 0.938748111 | 1.013482779 | 3.747610415 | Oncofetal driver |
| ZNF552    | 7.180009785 | 2.442582811 | 2.198513551 | 6.811372064 | Oncofetal driver |
| HK2       | 13.48254147 | 0.410873932 | 0.404088228 | 3.069891544 | Oncofetal driver |
| MAU2      | 4.677129792 | 2.219224791 | 2.19333511  | 5.405661133 | Oncofetal driver |
| LDB1      | 14.45650298 | 6.369260374 | 6.943224051 | 14.26693372 | Oncofetal driver |
| PRR14L    | 7.871670037 | 2.519632115 | 2.472051281 | 7.741839056 | Oncofetal driver |
| ZNHIT6    | 6.10749944  | 2.744612025 | 2.590439778 | 5.863587734 | Oncofetal driver |
| KLHL7     | 5.461785694 | 2.079178644 | 2.105473101 | 5.172307023 | Oncofetal driver |
| WNK1      | 23.38451274 | 10.50912477 | 11.97408592 | 39.6642526  | Oncofetal driver |
| LEPREL4   | 12.59838412 | 0.740854678 | 0.323251707 | 3.158648787 | Oncofetal driver |
| BMS1      | 19.13332775 | 8.019077366 | 10.58817699 | 24.15989606 | Oncofetal driver |
| RAB11FIP4 | 3.794911077 | 0.791043963 | 0.78512125  | 3.020828877 | Oncofetal driver |
| HAUS2     | 3.477883053 | 1.635961497 | 1.733282609 | 3.793069327 | Oncofetal driver |
| PPME1     | 3.432419382 | 1.016947477 | 1.125934174 | 2.31463308  | Oncofetal driver |
| CD200     | 6.042577318 | 0.476149867 | 0.454580515 | 2.303861082 | Oncofetal driver |



|            |             |             |             |             |                  |
|------------|-------------|-------------|-------------|-------------|------------------|
| SMARCA4    | 19.21626186 | 5.779565572 | 7.957510373 | 16.10222929 | Oncofetal driver |
| SUV420H2   | 3.09085697  | 0.404773816 | 0.509786975 | 2.497122647 | Oncofetal driver |
| ATP9A      | 18.7158132  | 2.708526139 | 2.793131969 | 12.81633794 | Oncofetal driver |
| SLC22A17   | 6.807249927 | 0.977096974 | 0.536707731 | 4.152777101 | Oncofetal driver |
| GMCL1      | 9.606532061 | 4.655300707 | 4.448337149 | 21.07493088 | Oncofetal driver |
| TP53BP2    | 11.84215324 | 2.73587442  | 5.10137827  | 8.862521821 | Oncofetal driver |
| ASAP1      | 10.95245186 | 3.395389802 | 4.512441671 | 8.789901609 | Oncofetal driver |
| DLG5       | 8.474876796 | 1.01729651  | 0.881116236 | 3.151599212 | Oncofetal driver |
| ST6GALNAC2 | 13.91311788 | 1.183629228 | 0.70578154  | 6.090618828 | Oncofetal driver |
| SEMA5A     | 13.65977377 | 3.916709386 | 2.151621817 | 6.127772794 | Oncofetal driver |
| FUNDC1     | 10.49183487 | 3.606041999 | 4.109890204 | 9.388134126 | Oncofetal driver |
| YOD1       | 5.338196324 | 1.215707063 | 2.441020454 | 6.958452217 | Oncofetal driver |
| TTC7A      | 4.383480641 | 1.514192181 | 2.110196755 | 4.353246693 | Oncofetal driver |
| POLR2A     | 15.4298325  | 6.061756098 | 8.204689419 | 16.50050096 | Oncofetal driver |
| WASF1      | 9.403104678 | 1.490653876 | 2.207612792 | 4.111195423 | Oncofetal driver |
| SMAD5      | 13.01849564 | 3.772010375 | 4.310361425 | 17.15451273 | Oncofetal driver |
| RSPH3      | 6.264490069 | 1.966358489 | 2.289375672 | 6.630092176 | Oncofetal driver |
| FAF2       | 13.1657608  | 6.135178402 | 6.604303448 | 12.78076061 | Oncofetal driver |
| UHRF1BP1   | 7.160775164 | 1.694321511 | 1.873777231 | 4.554964652 | Oncofetal driver |
| SAE1       | 13.63883186 | 5.76952499  | 7.162810485 | 33.68274243 | Oncofetal driver |
| ZNF597     | 3.205062348 | 1.327015739 | 1.549032967 | 3.556014667 | Oncofetal driver |
| DVL3       | 17.97781975 | 4.628801597 | 4.828356678 | 10.26153999 | Oncofetal driver |
| LSM14A     | 53.61828193 | 23.7356026  | 24.58861734 | 98.27229242 | Oncofetal driver |
| CDV3       | 91.17750867 | 35.12345203 | 37.94819128 | 73.78504685 | Oncofetal driver |
| CCDC127    | 7.592587548 | 3.777896144 | 3.805730821 | 8.025336625 | Oncofetal driver |
| C10orf2    | 2.483737366 | 1.085911805 | 1.375029749 | 4.790041226 | Oncofetal driver |
| HMGA1      | 36.04064531 | 4.446107601 | 5.320014127 | 30.84679296 | Oncofetal driver |
| ANKRD13C   | 7.145987152 | 2.67081099  | 3.077868983 | 6.641829969 | Oncofetal driver |
| C9orf40    | 3.489127496 | 0.672511352 | 0.837445707 | 4.740339371 | Oncofetal driver |
| C6orf228   | 5.314363543 | 2.148129747 | 2.778684805 | 8.946194746 | Oncofetal driver |
| 42070      | 36.48646972 | 16.46995824 | 18.39524174 | 42.19762889 | Oncofetal driver |
| ISYNA1     | 5.52917865  | 1.669219171 | 1.446048416 | 5.393493949 | Oncofetal driver |
| DSTYK      | 3.741893364 | 1.775824832 | 1.412679273 | 3.539562195 | Oncofetal driver |
| PIK3C2B    | 2.626983157 | 1.054278269 | 1.045267993 | 2.319714422 | Oncofetal driver |
| RRP12      | 2.755135542 | 0.753891736 | 1.114939869 | 2.279918689 | Oncofetal driver |
| CHD8       | 10.75881895 | 4.140983611 | 4.596257297 | 9.848017139 | Oncofetal driver |
| BMF        | 5.602357192 | 1.394926746 | 1.455848277 | 8.338684869 | Oncofetal driver |
| BMP4       | 9.46577671  | 1.832402577 | 0.458351545 | 2.927621002 | Oncofetal driver |
| ZMYM1      | 5.33965199  | 2.025856872 | 1.938233731 | 6.159090966 | Oncofetal driver |
| SASS6      | 2.857580504 | 1.099028695 | 1.165825827 | 5.14304633  | Oncofetal driver |
| FMO1       | 5.644579111 | 0.558855587 | 0.377898495 | 3.806343077 | Oncofetal driver |
| LEMD2      | 5.093641642 | 2.241738835 | 2.734418027 | 5.122336201 | Oncofetal driver |
| C9orf86    | 8.488776548 | 1.112940169 | 1.067020132 | 2.320570692 | Oncofetal driver |
| C6orf211   | 23.24126601 | 8.25863541  | 10.24886259 | 19.24712812 | Oncofetal driver |

|         |             |             |             |             |                  |
|---------|-------------|-------------|-------------|-------------|------------------|
| RPL39L  | 3.256642152 | 0.271959717 | 0.746293504 | 8.781048265 | Oncofetal driver |
| TLE1    | 24.92843401 | 8.683910874 | 9.419105126 | 24.02119857 | Oncofetal driver |
| ETV3    | 6.003369988 | 1.710051932 | 2.557438064 | 11.52266473 | Oncofetal driver |
| MED15   | 6.48081206  | 1.641502984 | 1.898939676 | 3.705406122 | Oncofetal driver |
| KLHL22  | 2.185211981 | 0.700875395 | 1.332341423 | 3.49715461  | Oncofetal driver |
| ATAD5   | 2.701130348 | 1.207825135 | 1.333564682 | 6.948043225 | Oncofetal driver |
| CDK1    | 3.076722879 | 0.105352959 | 0.542948559 | 6.181828948 | Oncofetal driver |
| ZBTB26  | 3.534532935 | 1.90618544  | 1.09245033  | 3.757230016 | Oncofetal driver |
| STX7    | 19.16793103 | 7.262193485 | 9.409417578 | 19.31829062 | Oncofetal driver |
| SLC3A1  | 6.346004976 | 0.961470744 | 1.987927577 | 13.60230817 | Oncofetal driver |
| GJC1    | 3.36284751  | 0.218607389 | 0.108589712 | 3.088052516 | Oncofetal driver |
| NOMO2   | 7.864147388 | 1.932384205 | 4.559698952 | 6.864604884 | Oncofetal driver |
| DCAF7   | 25.56500659 | 8.905162649 | 9.193394649 | 25.41694254 | Oncofetal driver |
| CTBP2   | 7.433757143 | 1.383298863 | 0.97916548  | 2.6890064   | Oncofetal driver |
| SLC1A5  | 16.81443147 | 1.612102361 | 1.348081567 | 3.112649643 | Oncofetal driver |
| HNFB1B  | 5.07527001  | 2.469842905 | 2.482606638 | 13.45264798 | Oncofetal driver |
| LPCAT1  | 17.97995442 | 1.724920271 | 2.555158453 | 5.040701042 | Oncofetal driver |
| C5orf24 | 20.38153126 | 6.190641506 | 10.45884463 | 18.72295316 | Oncofetal driver |
| RHOU    | 31.27681507 | 8.223306862 | 13.07183542 | 22.01142646 | Oncofetal driver |
| HEATR6  | 4.221603891 | 1.573852413 | 1.528806069 | 4.520561949 | Oncofetal driver |
| BEX2    | 4.332663304 | 0.33268153  | 0.574238614 | 7.705602474 | Oncofetal driver |
| GFPT1   | 48.36598159 | 4.065711369 | 6.323288982 | 18.77279441 | Oncofetal driver |
| EIF2AK3 | 8.588809351 | 1.500575884 | 2.208525514 | 4.33990153  | Oncofetal driver |
| SCD5    | 4.542039024 | 0.963729557 | 0.758888315 | 2.256652819 | Oncofetal driver |
| SMC3    | 54.75461392 | 24.85398279 | 23.03595475 | 67.68438323 | Oncofetal driver |
| BAG3    | 18.09085462 | 2.076364143 | 4.375836207 | 8.69089812  | Oncofetal driver |
| AGAP1   | 2.922860804 | 0.861737264 | 0.858768868 | 3.77396687  | Oncofetal driver |
| PEA15   | 48.19078317 | 12.41638306 | 14.26796727 | 60.56183287 | Oncofetal driver |
| POLD1   | 4.419734036 | 0.681195843 | 1.035829142 | 8.739542238 | Oncofetal driver |
| NCAPD2  | 6.085638544 | 1.641077367 | 1.796489614 | 9.947415462 | Oncofetal driver |
| CENPF   | 2.173693455 | 0.213627671 | 1.020719845 | 15.94992493 | Oncofetal driver |
| SMAD3   | 10.9034938  | 3.346386495 | 3.366413225 | 14.25033035 | Oncofetal driver |
| CNN1    | 13.61327491 | 1.420827558 | 0.231976791 | 2.432804799 | Oncofetal driver |
| ALPK3   | 9.882807508 | 0.367028425 | 0.382713764 | 10.04820163 | Oncofetal driver |
| IREB2   | 12.26199607 | 4.929624918 | 5.279806806 | 13.43812364 | Oncofetal driver |
| WDYHV1  | 3.095826352 | 0.97547599  | 1.755683387 | 3.358316915 | Oncofetal driver |
| NCK2    | 26.15700123 | 3.505330766 | 3.000636825 | 24.08095745 | Oncofetal driver |
| MAP4K4  | 40.62457942 | 11.20924506 | 12.55037176 | 38.56725774 | Oncofetal driver |
| C3orf58 | 15.87926131 | 3.054723144 | 3.400346575 | 12.20479968 | Oncofetal driver |
| CNOT3   | 6.342229139 | 2.401337183 | 2.630402138 | 9.257956284 | Oncofetal driver |
| SPTY2D1 | 10.7774952  | 3.686191244 | 4.787457448 | 9.218188453 | Oncofetal driver |
| TTYH3   | 18.35005472 | 0.994453545 | 3.809144248 | 9.473416678 | Oncofetal driver |
| HIVEP2  | 4.582942488 | 1.649574134 | 2.003666226 | 8.973722413 | Oncofetal driver |
| FUT11   | 6.720572681 | 1.352784294 | 1.833646993 | 3.983475019 | Oncofetal driver |

|           |             |             |             |             |                  |
|-----------|-------------|-------------|-------------|-------------|------------------|
| ZNF585A   | 2.266124313 | 0.926112995 | 1.04319099  | 2.210714546 | Oncofetal driver |
| EPRS      | 33.879586   | 10.9213184  | 13.18984853 | 27.27004359 | Oncofetal driver |
| SULF1     | 5.300666465 | 0.882418971 | 0.668862195 | 4.380261787 | Oncofetal driver |
| NDRG1     | 42.20183868 | 15.42194048 | 6.222611669 | 69.39304378 | Oncofetal driver |
| SLC1A4    | 4.734056654 | 1.590560939 | 1.304090182 | 5.89438098  | Oncofetal driver |
| SOS1      | 24.91524207 | 4.83618756  | 6.473431817 | 11.93162409 | Oncofetal driver |
| BUB1      | 2.009875145 | 0.088755326 | 0.383841196 | 3.293900922 | Oncofetal driver |
| SLC6A8    | 4.515655981 | 0.213477708 | 0.319351034 | 8.407840814 | Oncofetal driver |
| SUPT16H   | 19.65312267 | 8.966733058 | 9.492065519 | 30.18452871 | Oncofetal driver |
| MUC13     | 2.500162187 | 0.170808306 | 1.258331572 | 10.54098206 | Oncofetal driver |
| FAM220A   | 4.237578123 | 1.642140303 | 1.627337086 | 3.708889444 | Oncofetal driver |
| ADM2      | 3.216307314 | 0.125203959 | 0.293296804 | 2.642485303 | Oncofetal driver |
| EML2      | 3.946431147 | 1.62033646  | 1.415045408 | 8.25409182  | Oncofetal driver |
| CCNJ      | 3.971344776 | 1.027576133 | 1.255904703 | 2.826515935 | Oncofetal driver |
| BLMH      | 7.532949316 | 3.064387141 | 1.919280845 | 5.106007439 | Oncofetal driver |
| ZDHHC9    | 20.63191814 | 5.969612498 | 9.034483082 | 19.92521036 | Oncofetal driver |
| FAT1      | 12.37337095 | 1.19079697  | 6.224621557 | 8.91642436  | Oncofetal driver |
| C5orf22   | 8.036006495 | 3.514132274 | 3.695167672 | 7.985632075 | Oncofetal driver |
| KDELRL1   | 197.2962082 | 38.24653421 | 38.61361896 | 97.21607597 | Oncofetal driver |
| ZNF649    | 4.597013877 | 1.148922019 | 1.3038385   | 4.147589056 | Oncofetal driver |
| SESTD1    | 16.07913747 | 2.319136963 | 1.870455709 | 9.998763672 | Oncofetal driver |
| C20orf112 | 5.06552625  | 1.451499048 | 1.562259667 | 3.758338917 | Oncofetal driver |
| CHD2      | 22.05840791 | 9.669370753 | 10.96932362 | 25.4923108  | Oncofetal driver |
| ZNF529    | 3.363457989 | 1.437063303 | 1.811664778 | 3.679834629 | Oncofetal driver |
| ZNF284    | 2.426434392 | 0.503590005 | 0.56799689  | 4.327008067 | Oncofetal driver |
| ACTR8     | 8.483224419 | 2.339682959 | 2.301473796 | 5.23875964  | Oncofetal driver |
| SMC4      | 23.28300821 | 5.760773769 | 7.855111649 | 46.96932526 | Oncofetal driver |
| KRT10     | 7.508676059 | 3.189508738 | 3.806196283 | 8.627565959 | Oncofetal driver |
| ZDHHC20   | 7.106547092 | 1.922251235 | 2.753650973 | 5.478869994 | Oncofetal driver |
| ZNF165    | 2.221626561 | 0.61568479  | 1.437695082 | 2.527384515 | Oncofetal driver |
| ZNF805    | 2.43337226  | 0.821944655 | 0.964150368 | 2.919792751 | Oncofetal driver |
| VPS35     | 17.14552593 | 6.419010133 | 7.405817737 | 14.43556879 | Oncofetal driver |
| FUBP1     | 21.02905686 | 8.016990124 | 9.333921317 | 38.23379498 | Oncofetal driver |
| BTBD3     | 10.73968212 | 1.491112286 | 2.001315617 | 4.13509621  | Oncofetal driver |
| PRRC2A    | 18.51945028 | 5.884823818 | 7.207623846 | 14.30857161 | Oncofetal driver |
| SLC35F5   | 11.58995418 | 3.042358538 | 3.516793077 | 8.790631343 | Oncofetal driver |
| SENP1     | 3.86524442  | 1.326171325 | 1.894283835 | 4.020853863 | Oncofetal driver |
| ZNF526    | 3.122027688 | 0.864477778 | 0.756356778 | 5.664431267 | Oncofetal driver |
| HSPA5     | 220.9412035 | 96.07487013 | 118.2745814 | 217.0377187 | Oncofetal driver |
| ZCCHC11   | 10.21099952 | 3.714278093 | 3.842446487 | 11.47538279 | Oncofetal driver |
| CEP350    | 14.89053112 | 4.423206503 | 4.805727914 | 20.02638043 | Oncofetal driver |
| PRPF4     | 8.304755291 | 2.871351055 | 4.712118895 | 9.509571537 | Oncofetal driver |
| YTHDF1    | 19.7875725  | 4.44942236  | 5.045459462 | 10.97704305 | Oncofetal driver |
| WDR37     | 3.527721913 | 1.430755949 | 1.746595072 | 3.449578108 | Oncofetal driver |

|          |             |             |             |             |                  |
|----------|-------------|-------------|-------------|-------------|------------------|
| E2F3     | 2.903937029 | 0.845387978 | 1.705539203 | 7.709787118 | Oncofetal driver |
| ASCC3    | 10.05449885 | 2.868133936 | 4.601975959 | 13.13572195 | Oncofetal driver |
| CCT6A    | 41.72181852 | 16.08871739 | 23.12263561 | 50.26727208 | Oncofetal driver |
| PSPH     | 7.204041451 | 1.968170252 | 2.291299391 | 5.986592028 | Oncofetal driver |
| DICER1   | 13.6901349  | 4.522412282 | 5.447027066 | 14.46436531 | Oncofetal driver |
| BCL2L12  | 7.053036732 | 2.854340661 | 3.37183994  | 21.84377749 | Oncofetal driver |
| PRMT1    | 9.924257072 | 3.258704739 | 3.846009813 | 8.794093504 | Oncofetal driver |
| PROM1    | 52.66708872 | 0.681317512 | 0.63323942  | 2.89838158  | Oncofetal driver |
| DYNC1H1  | 21.99045453 | 4.265011421 | 5.513039026 | 11.51963604 | Oncofetal driver |
| PKIB     | 37.79429431 | 1.27828913  | 1.168921325 | 2.71108108  | Oncofetal driver |
| PMM2     | 4.121677873 | 0.964246226 | 1.65560992  | 3.078911097 | Oncofetal driver |
| FRAS1    | 5.875751945 | 0.286713409 | 0.157733898 | 2.111207434 | Oncofetal driver |
| PRKAB2   | 45.65292189 | 21.27761026 | 21.25919694 | 60.34635626 | Oncofetal driver |
| ABCA1    | 31.44124736 | 9.029302227 | 10.42918511 | 25.25295281 | Oncofetal driver |
| SP3      | 12.49752247 | 5.009302865 | 5.942983396 | 14.82455021 | Oncofetal driver |
| ZNF525   | 6.004883331 | 0.677323209 | 0.643242543 | 3.116357869 | Oncofetal driver |
| PCGF2    | 6.253198158 | 1.102578274 | 1.714570846 | 4.276126945 | Oncofetal driver |
| PARM1    | 114.058606  | 1.12895929  | 0.49826664  | 2.742400325 | Oncofetal driver |
| CEP250   | 5.342718066 | 1.925420198 | 2.28469586  | 5.734254253 | Oncofetal driver |
| HNRNPA0  | 26.00498505 | 9.444883847 | 11.88900528 | 23.04640735 | Oncofetal driver |
| FLYWCH2  | 4.896081142 | 1.297323277 | 1.427645539 | 5.081453332 | Oncofetal driver |
| KIAA1217 | 17.79019013 | 6.554567533 | 6.076582667 | 13.69867744 | Oncofetal driver |
| SHC1     | 25.18987954 | 8.128368968 | 8.674044871 | 18.02041184 | Oncofetal driver |
| SPSB1    | 56.87599675 | 1.34935221  | 2.908620671 | 4.918113506 | Oncofetal driver |
| KCNJ16   | 8.46338383  | 0.555729374 | 0.685171074 | 5.598993672 | Oncofetal driver |
| DMPK     | 6.460699991 | 1.316648379 | 1.335643575 | 6.400793787 | Oncofetal driver |
| TUBG1    | 16.03277181 | 5.409293329 | 6.979253099 | 16.40511536 | Oncofetal driver |
| ZNF211   | 4.454920722 | 1.87760132  | 2.022377592 | 6.120700442 | Oncofetal driver |
| PPP1R2   | 11.56245139 | 3.81869446  | 4.853704853 | 9.47699613  | Oncofetal driver |
| TSPYL2   | 15.95696735 | 5.667999814 | 6.617345672 | 15.5375437  | Oncofetal driver |
| TCF7L2   | 21.59149232 | 6.961623967 | 6.966473159 | 17.05252094 | Oncofetal driver |
| LSM11    | 3.571582795 | 0.706807302 | 0.457158129 | 2.378850321 | Oncofetal driver |
| CSTF3    | 13.54526656 | 3.391604913 | 5.309488791 | 10.71929109 | Oncofetal driver |
| YAE1D1   | 4.826675799 | 2.364505466 | 1.689857502 | 4.920885302 | Oncofetal driver |
| TPX2     | 5.465810876 | 1.268031715 | 3.056064453 | 23.06371884 | Oncofetal driver |
| PNMA1    | 7.76086869  | 1.359724865 | 1.588952024 | 4.559871089 | Oncofetal driver |
| HSPA13   | 15.30618706 | 1.762578357 | 4.177236774 | 11.35811167 | Oncofetal driver |
| TRNP1    | 23.95464667 | 1.531837881 | 1.43536405  | 3.793296285 | Oncofetal driver |
| TOPBP1   | 9.272557471 | 2.993077551 | 4.397883329 | 16.36810932 | Oncofetal driver |
| HIST3H2A | 3.925304323 | 0.249087529 | 0.194500176 | 2.751737849 | Oncofetal driver |
| COL6A3   | 23.27818328 | 2.770692647 | 2.24009012  | 6.179395318 | Oncofetal driver |
| MICAL3   | 2.113740039 | 1.045170277 | 1.026803665 | 3.585209062 | Oncofetal driver |
| MMGT1    | 11.17434249 | 3.531027852 | 3.860948165 | 9.918411219 | Oncofetal driver |
| GSK3A    | 7.616911867 | 3.368658295 | 3.600751678 | 11.98997887 | Oncofetal driver |

|         |             |             |             |             |                  |
|---------|-------------|-------------|-------------|-------------|------------------|
| NPTN    | 31.26137979 | 7.106574433 | 8.005130637 | 22.12568565 | Oncofetal driver |
| LMNB2   | 4.204473702 | 0.716447635 | 0.916413788 | 2.595013892 | Oncofetal driver |
| HAUS6   | 4.057845098 | 1.687380639 | 2.157608203 | 9.328469336 | Oncofetal driver |
| RHPN2   | 12.33942183 | 2.865688138 | 3.992911278 | 13.27052578 | Oncofetal driver |
| ZNF614  | 7.807056546 | 0.929617889 | 1.031827012 | 4.647504567 | Oncofetal driver |
| UBE2S   | 3.983347195 | 0.554179599 | 2.515252062 | 6.623990604 | Oncofetal driver |
| CCDC149 | 2.300881403 | 0.908689004 | 0.817321804 | 2.128492382 | Oncofetal driver |
| GOPC    | 14.58856436 | 5.9335541   | 8.001903667 | 15.35288829 | Oncofetal driver |
| GXYLT1  | 8.267952845 | 3.639240677 | 4.49868503  | 12.30210347 | Oncofetal driver |
| IMPA2   | 12.89810481 | 3.099575762 | 4.301603236 | 7.537153448 | Oncofetal driver |
| PURB    | 8.892670049 | 3.15739853  | 4.740062617 | 13.08178358 | Oncofetal driver |
| ZNF720  | 2.679762632 | 0.9397793   | 1.56855594  | 3.863616852 | Oncofetal driver |
| PRLR    | 8.428331912 | 4.416639223 | 3.094001826 | 20.68752968 | Oncofetal driver |
| NCOR2   | 13.68959532 | 2.859934781 | 3.508201409 | 7.264000436 | Oncofetal driver |
| KLF5    | 14.47211912 | 0.942463348 | 1.19566845  | 27.47800979 | Oncofetal driver |
| SPARC   | 1197.625884 | 46.31003443 | 37.71018203 | 121.9428177 | Oncofetal driver |
| FLVCR1  | 15.16068534 | 0.773529812 | 1.24296542  | 2.80639979  | Oncofetal driver |
| MAFG    | 4.668851956 | 1.218906483 | 1.703970582 | 3.000450289 | Oncofetal driver |
| ADCY6   | 5.526876355 | 1.610679163 | 1.566581919 | 3.644015386 | Oncofetal driver |
| WDR27   | 2.371574493 | 0.845005385 | 0.902750791 | 2.750229623 | Oncofetal driver |
| ACLY    | 35.00216038 | 5.252625909 | 12.21847345 | 20.84423024 | Oncofetal driver |
| ZNF549  | 2.36750803  | 0.545531364 | 1.234534082 | 3.674140138 | Oncofetal driver |
| 42249   | 53.18145189 | 17.66358512 | 21.4179017  | 50.86336653 | Oncofetal driver |
| TAOK1   | 10.61859361 | 3.048664054 | 3.607815918 | 11.14185968 | Oncofetal driver |
| RSL1D1  | 52.98574356 | 28.13879122 | 23.75560071 | 57.40446975 | Oncofetal driver |
| RUNX1   | 2.254724428 | 0.737940943 | 1.315042721 | 2.920225272 | Oncofetal driver |
| RNPS1   | 7.594328602 | 2.329770439 | 2.841778564 | 7.227092522 | Oncofetal driver |
| MEX3D   | 4.350517023 | 0.882378209 | 1.280872812 | 2.81354884  | Oncofetal driver |
| PLOD2   | 39.48130441 | 8.747100926 | 12.15300999 | 50.97974819 | Oncofetal driver |
| MFAP1   | 32.44598203 | 10.18715161 | 12.93612227 | 34.70779136 | Oncofetal driver |
| LRRC16A | 11.38475303 | 0.949334302 | 1.432551146 | 4.509131761 | Oncofetal driver |
| ARHGAP5 | 31.11561093 | 8.433574002 | 9.83949716  | 21.24649052 | Oncofetal driver |
| RARS2   | 50.28992546 | 13.67355143 | 15.17776963 | 29.76857638 | Oncofetal driver |
| ENAH    | 22.71348031 | 3.526421608 | 4.468029651 | 9.605854493 | Oncofetal driver |
| RSL24D1 | 30.95249504 | 11.05863641 | 10.83667845 | 26.57610061 | Oncofetal driver |
| C11orf9 | 19.02724726 | 1.500591303 | 1.648759984 | 4.368184055 | Oncofetal driver |
| ERO1L   | 25.00397034 | 5.876195255 | 8.499461839 | 21.64259616 | Oncofetal driver |
| SKP2    | 37.51991258 | 6.294896931 | 6.552156871 | 19.96645003 | Oncofetal driver |
| ZNF432  | 8.586390032 | 1.197984283 | 1.848883258 | 6.363260621 | Oncofetal driver |
| BIN1    | 33.33966841 | 3.057927778 | 3.32201472  | 8.508812567 | Oncofetal driver |
| ZNF845  | 3.840405268 | 1.447261524 | 1.58437109  | 6.975577124 | Oncofetal driver |
| KCTD15  | 5.851817645 | 2.232734317 | 1.157508626 | 11.0468139  | Oncofetal driver |
| TCF7L1  | 10.10742496 | 5.070836713 | 2.683908542 | 15.45046422 | Oncofetal driver |
| RIOK2   | 7.092306046 | 3.042652609 | 3.436664683 | 6.827929197 | Oncofetal driver |

|           |             |             |             |             |                  |
|-----------|-------------|-------------|-------------|-------------|------------------|
| FAM222B   | 10.22344753 | 2.28832986  | 2.752847447 | 6.640233033 | Oncofetal driver |
| H2AFZ     | 12.20730322 | 4.023472029 | 5.537824543 | 12.231809   | Oncofetal driver |
| PMEP A1   | 10.39236878 | 1.96054656  | 1.524598922 | 30.41441873 | Oncofetal driver |
| CANT1     | 6.827014296 | 3.313209998 | 3.025751277 | 10.93458798 | Oncofetal driver |
| ZNF124    | 4.331672921 | 0.875252881 | 1.136222058 | 2.045779677 | Oncofetal driver |
| ZNF765    | 4.927849279 | 0.554941105 | 0.804618259 | 5.204914861 | Oncofetal driver |
| LUZP1     | 5.06304026  | 1.695674203 | 1.891998013 | 5.068156782 | Oncofetal driver |
| GGA3      | 3.919884408 | 1.678126668 | 2.096586259 | 5.460312357 | Oncofetal driver |
| EHMT2     | 2.869991292 | 1.415311991 | 1.365882754 | 4.015121508 | Oncofetal driver |
| CDH2      | 57.16579368 | 15.94052835 | 20.51444827 | 48.4967846  | Oncofetal driver |
| FZD6      | 15.06499427 | 0.886461563 | 1.803660178 | 5.273073902 | Oncofetal driver |
| MOB4      | 11.55180094 | 3.992667451 | 5.560169642 | 12.70821204 | Oncofetal driver |
| KDM3A     | 5.763773803 | 1.962019706 | 2.133123405 | 9.024591657 | Oncofetal driver |
| MOB3B     | 10.96052334 | 0.752948812 | 0.744392616 | 7.259498422 | Oncofetal driver |
| C19orf54  | 4.576446142 | 1.818500671 | 1.91777957  | 5.882960976 | Oncofetal driver |
| PAFAH1B2  | 15.14989379 | 4.975997821 | 6.271161165 | 11.93258925 | Oncofetal driver |
| MMP14     | 41.4152085  | 3.556416388 | 4.231459379 | 16.72094256 | Oncofetal driver |
| CENPQ     | 5.823958605 | 1.675619183 | 1.769115638 | 14.24549441 | Oncofetal driver |
| HIF1A     | 88.89110534 | 9.442907793 | 17.86194799 | 32.10670196 | Oncofetal driver |
| CHD4      | 40.65777858 | 16.37601087 | 18.91234976 | 52.52117385 | Oncofetal driver |
| SMURF2    | 8.283707448 | 1.981917533 | 2.078841125 | 7.669334931 | Oncofetal driver |
| THOC5     | 4.480028424 | 1.926344344 | 1.655626578 | 4.033028275 | Oncofetal driver |
| CARHSP1   | 7.714641682 | 4.043977587 | 3.329983315 | 8.63517457  | Oncofetal driver |
| CDYL      | 7.974364718 | 1.964709611 | 2.304376929 | 5.310347787 | Oncofetal driver |
| CHST3     | 10.95540027 | 0.821286017 | 0.55364182  | 2.076970851 | Oncofetal driver |
| QSER1     | 8.935926889 | 3.279120582 | 2.911466615 | 9.077746232 | Oncofetal driver |
| TGIF2     | 6.078913032 | 1.712926651 | 1.904785885 | 4.658844283 | Oncofetal driver |
| FAM108C1  | 2.756302678 | 1.16950498  | 1.063932585 | 3.775398209 | Oncofetal driver |
| SPAST     | 7.308022436 | 2.662285227 | 3.197847048 | 6.867381222 | Oncofetal driver |
| MTHFD1L   | 4.772123377 | 0.137413707 | 0.756949845 | 2.393581806 | Oncofetal driver |
| STK35     | 4.842153733 | 1.707423516 | 2.048408031 | 3.88189066  | Oncofetal driver |
| ACBD6     | 9.611794088 | 4.387436478 | 4.569730445 | 12.58344314 | Oncofetal driver |
| COL6A1    | 87.82922381 | 17.57967111 | 15.1211867  | 44.13363776 | Oncofetal driver |
| PPIH      | 7.378502867 | 2.159659445 | 3.305869895 | 8.375372141 | Oncofetal driver |
| USP51     | 2.685181633 | 1.238184132 | 1.006969823 | 2.817791349 | Oncofetal driver |
| UBE2T     | 2.56715138  | 0.270682911 | 1.068892609 | 7.731381607 | Oncofetal driver |
| CAMTA1    | 4.262424422 | 1.914937113 | 2.105574333 | 4.80690145  | Oncofetal driver |
| SULT1C2   | 2.022150274 | 0.117678214 | 0.457148359 | 9.275985998 | Oncofetal driver |
| ZNF417    | 4.29161194  | 1.631488558 | 2.151266473 | 6.181965705 | Oncofetal driver |
| UGCG      | 36.24530515 | 4.131632567 | 10.50636425 | 17.3422776  | Oncofetal driver |
| C14orf118 | 3.262537197 | 1.173457879 | 1.274184478 | 3.574959057 | Oncofetal driver |
| HKDC1     | 2.916766035 | 0.109934638 | 1.675049239 | 6.648033112 | Oncofetal driver |
| ZNF134    | 5.617012164 | 2.032911251 | 2.521646635 | 7.924535397 | Oncofetal driver |
| STXBP6    | 2.084832304 | 0.510505411 | 0.322889098 | 3.175794035 | Oncofetal driver |

|                |             |             |             |             |                  |
|----------------|-------------|-------------|-------------|-------------|------------------|
| NEDD9          | 17.0286011  | 0.99189368  | 2.821801565 | 5.19248833  | Oncofetal driver |
| SRP68          | 32.42048946 | 13.31349483 | 14.54709663 | 36.51229402 | Oncofetal driver |
| ASPHD1         | 9.531932401 | 0.106874926 | 0.150216053 | 6.590497218 | Oncofetal driver |
| SNRPD2         | 42.12524845 | 18.57248714 | 17.55858749 | 49.03355737 | Oncofetal driver |
| ZNF616         | 7.720059462 | 2.622915124 | 2.78711217  | 7.485196122 | Oncofetal driver |
| RACGAP1        | 2.946511711 | 0.349157708 | 0.854036094 | 6.760230566 | Oncofetal driver |
| BRD3           | 6.501634246 | 3.000719076 | 3.261100631 | 7.676630217 | Oncofetal driver |
| NRM            | 2.148544646 | 1.061193517 | 1.080410887 | 13.58231585 | Oncofetal driver |
| CSNK1G1        | 3.809899718 | 1.494726751 | 1.505985726 | 6.958509695 | Oncofetal driver |
| SPP1           | 28.64831663 | 4.490833319 | 6.28249169  | 105.478342  | Oncofetal driver |
| MBOAT7         | 8.925329148 | 1.416596071 | 2.552653979 | 4.338788677 | Oncofetal driver |
| PCGF3          | 10.96098466 | 3.946306863 | 3.178056905 | 8.184501008 | Oncofetal driver |
| CHSY1          | 7.713182527 | 1.260309658 | 2.222939182 | 6.714449865 | Oncofetal driver |
| SNRPA1         | 9.453830681 | 3.513249816 | 3.849417705 | 11.78198076 | Oncofetal driver |
| KIF21A         | 28.13767071 | 6.672258663 | 9.038552015 | 16.36862088 | Oncofetal driver |
| CDK8           | 18.20328161 | 3.050771153 | 3.965738096 | 7.077151978 | Oncofetal driver |
| LPHN1          | 2.356588405 | 0.462606266 | 0.366973219 | 2.713307011 | Oncofetal driver |
| ADNP           | 15.51748667 | 6.746350473 | 6.115894829 | 17.55980016 | Oncofetal driver |
| DHX15          | 18.75656704 | 5.782297515 | 7.110709095 | 18.56158772 | Oncofetal driver |
| GPATCH3        | 3.8414619   | 1.341900756 | 2.107210533 | 3.730807088 | Oncofetal driver |
| ZNF652         | 8.515294902 | 3.970999946 | 4.356026819 | 11.87565283 | Oncofetal driver |
| SGPP1          | 17.64376348 | 6.776704999 | 9.315148996 | 22.01673582 | Oncofetal driver |
| PLP2           | 19.72440446 | 3.735079509 | 4.646349155 | 26.81825459 | Oncofetal driver |
| SIPA1L2        | 16.53690579 | 1.061765068 | 0.734808987 | 4.049774853 | Oncofetal driver |
| COL4A1         | 326.2193782 | 5.31968576  | 9.501465687 | 61.32401479 | Oncofetal driver |
| RP11-382A20.3  | 16.95404556 | 2.362169396 | 2.256802039 | 5.363621686 | Oncofetal driver |
| PHLDB1         | 2.174716551 | 0.47853927  | 0.584413408 | 2.363863421 | Oncofetal driver |
| NBL1           | 10.06878455 | 1.106927702 | 0.830886762 | 3.492018694 | Oncofetal driver |
| TUBA1C         | 14.20279911 | 1.998434907 | 2.889280134 | 5.382205254 | Oncofetal driver |
| SH3RF1         | 8.426318363 | 2.237063485 | 2.655383907 | 5.43058028  | Oncofetal driver |
| PRR12          | 6.195970454 | 1.723351767 | 1.934444617 | 10.6588042  | Oncofetal driver |
| ARL5A          | 15.99683564 | 5.133251952 | 7.322632007 | 13.64665499 | Oncofetal driver |
| FBLIM1         | 11.50973021 | 1.034801287 | 1.55877291  | 3.89993097  | Oncofetal driver |
| SCAF1          | 13.20613708 | 4.856513624 | 5.168147527 | 18.64911468 | Oncofetal driver |
| MAFF           | 9.601241801 | 1.224268971 | 7.148721004 | 10.5673328  | Oncofetal driver |
| RLIM           | 13.34344117 | 3.263535155 | 4.312978142 | 9.650612031 | Oncofetal driver |
| MAP3K1         | 10.30243556 | 2.548552376 | 3.095708759 | 9.424320366 | Oncofetal driver |
| UACA           | 56.76480494 | 11.09548592 | 10.37221425 | 29.46185959 | Oncofetal driver |
| BORA           | 2.606642964 | 1.065581441 | 1.448487606 | 3.498098901 | Oncofetal driver |
| APPBP2         | 11.99995094 | 4.921776508 | 5.649911351 | 13.58815107 | Oncofetal driver |
| OTUD3          | 6.796954343 | 0.626835313 | 0.832565375 | 3.167584663 | Oncofetal driver |
| NPNT           | 69.0927325  | 1.753806412 | 1.283771112 | 3.17131598  | Oncofetal driver |
| RP11-1407O15.2 | 2.447613374 | 0.858319926 | 0.970390271 | 2.813284615 | Oncofetal driver |
| MSRB3          | 8.73889076  | 2.129882612 | 1.442666681 | 4.006674761 | Oncofetal driver |

|          |             |             |             |             |                  |
|----------|-------------|-------------|-------------|-------------|------------------|
| XPR1     | 12.68992333 | 1.824832641 | 2.86067966  | 10.66590966 | Oncofetal driver |
| CSNK1E   | 10.33087201 | 2.640374907 | 2.514409079 | 6.960599336 | Oncofetal driver |
| MANF     | 33.70604573 | 12.23183781 | 15.92177886 | 45.13114196 | Oncofetal driver |
| FAM168B  | 23.9756452  | 7.209773986 | 7.078761428 | 25.37181396 | Oncofetal driver |
| DCUN1D2  | 4.911969529 | 1.302942897 | 1.913459253 | 4.427592347 | Oncofetal driver |
| TMCO3    | 34.50165591 | 2.427103832 | 2.546737336 | 17.9569511  | Oncofetal driver |
| PERP     | 113.5513471 | 27.70438537 | 46.08955165 | 89.06479203 | Oncofetal driver |
| ANKZF1   | 8.247889322 | 3.90691693  | 3.664015861 | 8.801456279 | Oncofetal driver |
| EHD2     | 23.82362286 | 3.832634065 | 2.633941853 | 21.74917564 | Oncofetal driver |
| DSG2     | 79.73042846 | 3.995165448 | 6.327571468 | 30.91985836 | Oncofetal driver |
| ZNF384   | 8.262779297 | 3.160935311 | 3.752918723 | 14.48985026 | Oncofetal driver |
| GMPS     | 13.44340938 | 4.560099972 | 5.864776784 | 17.10798761 | Oncofetal driver |
| KIAA1462 | 2.462685459 | 0.90675016  | 0.924672028 | 7.482561268 | Oncofetal driver |
| 42255    | 12.03981491 | 1.838169221 | 2.200569991 | 6.566986757 | Oncofetal driver |
| ZNF460   | 2.312506477 | 0.88180668  | 0.762333597 | 2.001924558 | Oncofetal driver |
| HPS3     | 6.124944304 | 1.839913807 | 2.763394824 | 5.189548454 | Oncofetal driver |
| ITGAV    | 45.50421084 | 3.666348393 | 6.30928155  | 18.78054173 | Oncofetal driver |
| AP4E1    | 2.189716796 | 0.808651601 | 1.365999658 | 2.374603644 | Oncofetal driver |
| STT3A    | 30.02413738 | 12.68037698 | 12.24887349 | 25.08522488 | Oncofetal driver |
| NEK7     | 13.65459884 | 5.180657306 | 5.480529145 | 21.30601816 | Oncofetal driver |
| C12orf49 | 13.6818548  | 1.022498475 | 1.311087496 | 2.660706392 | Oncofetal driver |
| ZNF581   | 6.887173409 | 1.411970451 | 1.149789774 | 4.127919785 | Oncofetal driver |
| AMMECR1  | 11.31608179 | 0.985952356 | 1.211082985 | 3.461292931 | Oncofetal driver |
| PTGFRN   | 7.312761242 | 1.880182105 | 3.125622723 | 7.650824332 | Oncofetal driver |
| EXT1     | 17.66449646 | 5.307962991 | 5.488189847 | 22.26727996 | Oncofetal driver |
| SLC39A1  | 25.87222603 | 7.929465396 | 11.31748946 | 29.38500142 | Oncofetal driver |
| TCOF1    | 7.153257661 | 2.466858161 | 2.23450467  | 6.045577219 | Oncofetal driver |
| USP46    | 7.028511876 | 0.771045398 | 1.195139767 | 2.118068148 | Oncofetal driver |
| AQP3     | 49.05953444 | 9.76817843  | 9.976689888 | 21.74052849 | Oncofetal driver |
| FAM63B   | 9.908459481 | 2.907689836 | 3.459280468 | 14.09370143 | Oncofetal driver |
| ZMIZ1    | 14.49631988 | 3.40853525  | 3.488631974 | 13.64997452 | Oncofetal driver |
| SPTAN1   | 33.88751701 | 11.7052205  | 14.00585039 | 29.40819801 | Oncofetal driver |
| COL5A2   | 64.01229601 | 2.670299995 | 4.459609619 | 7.479106928 | Oncofetal driver |
| WBP5     | 141.7226483 | 13.03861095 | 21.33652731 | 96.72603848 | Oncofetal driver |
| PPP1R13L | 7.972932222 | 0.939499428 | 1.05032543  | 6.470241895 | Oncofetal driver |
| DOT1L    | 4.388280361 | 0.999798985 | 1.593878809 | 3.33245954  | Oncofetal driver |
| PFKFB3   | 8.313841381 | 2.35158312  | 5.20537861  | 8.74128809  | Oncofetal driver |
| ANP32B   | 210.2413736 | 83.68589016 | 79.78839683 | 226.0034359 | Oncofetal driver |
| TBC1D12  | 2.433594337 | 1.114523625 | 1.28097852  | 3.52281333  | Oncofetal driver |
| IFT52    | 5.785087845 | 1.644382713 | 1.988645699 | 4.797111964 | Oncofetal driver |
| SLC10A3  | 4.524429326 | 0.958589309 | 0.958675172 | 2.443799415 | Oncofetal driver |
| SMG9     | 6.924620491 | 2.450295796 | 2.656774861 | 9.613646024 | Oncofetal driver |
| AVL9     | 4.980114424 | 1.61938041  | 1.819837871 | 3.55226714  | Oncofetal driver |
| MGA      | 4.881808237 | 2.253075336 | 2.438225148 | 8.027665749 | Oncofetal driver |



|          |             |             |             |             |                  |
|----------|-------------|-------------|-------------|-------------|------------------|
| RCC1     | 11.71048939 | 1.735430436 | 2.808777809 | 5.574484443 | Oncofetal driver |
| DOCK1    | 9.74211258  | 3.833298496 | 4.640308587 | 10.05051368 | Oncofetal driver |
| CDK16    | 11.23871001 | 1.776956732 | 2.596642935 | 5.432504863 | Oncofetal driver |
| C10orf12 | 2.331761517 | 0.843234224 | 1.261656094 | 2.852268021 | Oncofetal driver |
| FNBP4    | 20.87850898 | 8.849977093 | 11.7305183  | 23.28167343 | Oncofetal driver |
| LIN37    | 6.773234782 | 2.639902018 | 2.62421285  | 5.562516585 | Oncofetal driver |
| MRE11A   | 6.357687134 | 2.159227942 | 3.375705028 | 8.196077793 | Oncofetal driver |
| CDKN1C   | 187.9640156 | 2.978005478 | 1.708593036 | 6.921821019 | Oncofetal driver |
| DCAF16   | 13.38669264 | 2.612384767 | 2.279593754 | 7.767990642 | Oncofetal driver |
| FZD5     | 29.4854089  | 8.300343089 | 7.190823432 | 30.93711155 | Oncofetal driver |
| CTGF     | 97.11760795 | 17.13148557 | 28.44256148 | 63.9388938  | Oncofetal driver |
| VPS13A   | 8.745990176 | 2.603981783 | 3.360950709 | 7.949053908 | Oncofetal driver |
| SYT15    | 3.091983273 | 0.955574355 | 0.773689187 | 3.19063749  | Oncofetal driver |
| SERPINH1 | 30.78034483 | 1.650986341 | 1.723697447 | 4.790043822 | Oncofetal driver |
| FNBP1L   | 48.3347928  | 6.414576412 | 8.007165843 | 25.57348946 | Oncofetal driver |
| SPINK1   | 233.883531  | 0.857968156 | 0.456286899 | 15.64723241 | Oncofetal driver |
| G2E3     | 3.808435904 | 0.868837179 | 1.116285497 | 2.40821891  | Oncofetal driver |
| NXT1     | 3.196903213 | 0.990139564 | 1.305766451 | 3.327327993 | Oncofetal driver |
| C2orf49  | 7.859763766 | 2.863252789 | 3.075452443 | 9.000595721 | Oncofetal driver |
| AKAP12   | 34.38692212 | 10.37688976 | 10.37011476 | 32.07624401 | Oncofetal driver |
| ZNF322   | 4.481519819 | 1.175895442 | 1.450754103 | 3.25115869  | Oncofetal driver |
| NRSN2    | 7.809864632 | 0.814730277 | 1.285758763 | 5.507496372 | Oncofetal driver |
| TRIM68   | 3.060239707 | 0.779023865 | 1.185061136 | 2.084899531 | Oncofetal driver |
| CST1     | 22.48576958 | 0           | 0           | 2.206687654 | Oncofetal driver |
| C11orf84 | 8.770913481 | 0.770245726 | 0.74235735  | 4.089157622 | Oncofetal driver |
| NOTCH3   | 5.317939251 | 0.859881839 | 0.425576989 | 5.486951967 | Oncofetal driver |
| GCNT4    | 3.729329165 | 0.479423417 | 0.449229742 | 13.68795143 | Oncofetal driver |
| AZI1     | 2.27641503  | 0.602113271 | 0.627421187 | 4.303494342 | Oncofetal driver |
| TNNT1    | 2.769545532 | 0           | 0           | 3.697075506 | Oncofetal driver |
| AGRN     | 12.04298759 | 1.638722368 | 1.915808648 | 4.47662146  | Oncofetal driver |
| TOX2     | 5.037020199 | 1.219092588 | 0.999525787 | 3.408308512 | Oncofetal driver |
| MFGE8    | 138.3785144 | 1.697127566 | 1.094055289 | 3.178879862 | Oncofetal driver |
| ZNF710   | 3.035222155 | 0.730037734 | 1.571384888 | 3.331739878 | Oncofetal driver |
| MYH9     | 83.53783235 | 34.40837155 | 44.47981854 | 90.34948826 | Oncofetal driver |
| PRDM2    | 5.913625104 | 2.774692138 | 3.042111833 | 6.657673187 | Oncofetal driver |
| MSANTD3  | 8.245916937 | 1.497950917 | 3.086548138 | 5.207016896 | Oncofetal driver |
| MAP3K7   | 7.931047942 | 3.265193878 | 4.429146052 | 9.901005541 | Oncofetal driver |
| RBM12    | 10.78363529 | 3.499465459 | 4.632157214 | 12.73312974 | Oncofetal driver |
| KIAA1429 | 7.617500967 | 3.523317006 | 3.740297428 | 9.753005511 | Oncofetal driver |
| RBPJ     | 19.06965156 | 4.614295278 | 4.904166714 | 10.44618666 | Oncofetal driver |
| UBE2C    | 2.145692563 | 0.050191921 | 0.54085509  | 6.012968203 | Oncofetal driver |
| GK5      | 3.781291366 | 0.725518795 | 1.09720794  | 4.191147313 | Oncofetal driver |
| ZNF362   | 2.711948002 | 1.129893895 | 1.1744428   | 2.576287255 | Oncofetal driver |
| YAP1     | 31.04424133 | 6.76017857  | 7.042339781 | 17.75483372 | Oncofetal driver |

|          |             |             |             |             |                  |
|----------|-------------|-------------|-------------|-------------|------------------|
| FNDC3B   | 18.17103962 | 5.369607154 | 6.129702508 | 14.55984675 | Oncofetal driver |
| WHSC1    | 2.993304693 | 0.748639689 | 1.026381833 | 5.400225308 | Oncofetal driver |
| GLIS3    | 6.173047089 | 0.901703105 | 0.797058127 | 7.614546293 | Oncofetal driver |
| CCT8     | 45.78626498 | 20.97928475 | 21.66076836 | 60.35101686 | Oncofetal driver |
| FOXP1    | 8.788891957 | 4.101600292 | 3.641082891 | 11.02911661 | Oncofetal driver |
| TTC28    | 4.220768988 | 2.146922609 | 1.790392504 | 4.423272789 | Oncofetal driver |
| MYO6     | 26.94674351 | 6.267611197 | 9.485781319 | 24.24168667 | Oncofetal driver |
| FRMD6    | 6.066734197 | 1.056241171 | 1.040947754 | 2.670906963 | Oncofetal driver |
| UNC5CL   | 11.62549266 | 2.799746052 | 3.321276142 | 10.05591541 | Oncofetal driver |
| S100A1   | 15.53646315 | 0.251610212 | 0.286740021 | 6.051832925 | Oncofetal driver |
| FAM126B  | 2.734136515 | 1.117334012 | 1.188641771 | 3.299828492 | Oncofetal driver |
| COL15A1  | 7.344103424 | 0.499501123 | 0.415715187 | 4.19042633  | Oncofetal driver |
| FAM199X  | 5.949527536 | 2.057190643 | 3.632742668 | 8.842496399 | Oncofetal driver |
| IGF1R    | 19.05381312 | 0.839867562 | 0.339926815 | 2.136610742 | Oncofetal driver |
| HNRNPA1  | 158.0943066 | 57.80475108 | 60.74585464 | 172.2680507 | Oncofetal driver |
| NEO1     | 9.32225351  | 2.843756962 | 2.890478206 | 6.530229036 | Oncofetal driver |
| EIF2C2   | 4.267821439 | 0.883579146 | 0.787935372 | 2.871059869 | Oncofetal driver |
| ESCO1    | 12.20487    | 4.034137713 | 5.52780681  | 11.67821683 | Oncofetal driver |
| UBXN2A   | 5.397262094 | 2.181198904 | 2.212045242 | 4.554936909 | Oncofetal driver |
| CDC73    | 8.475301673 | 3.528057394 | 4.675795854 | 9.506775855 | Oncofetal driver |
| ZDHHC12  | 3.982408118 | 1.561984382 | 1.864805073 | 3.64441073  | Oncofetal driver |
| ALCAM    | 31.61894234 | 11.74839136 | 18.44781742 | 33.32686885 | Oncofetal driver |
| SFN      | 2.530621458 | 0.015658734 | 0.058690243 | 10.10693775 | Oncofetal driver |
| STC1     | 7.604640113 | 0.3523687   | 1.102139535 | 4.352001123 | Oncofetal driver |
| RPS21    | 29.93457662 | 9.294392646 | 9.80652042  | 19.31621472 | Oncofetal driver |
| PKM      | 44.83786858 | 3.56959593  | 4.407194276 | 17.46235666 | Oncofetal driver |
| CCDC99   | 2.381814127 | 0.875030533 | 0.981482821 | 4.140529876 | Oncofetal driver |
| IFT80    | 2.900195293 | 1.199600911 | 1.156320487 | 4.481194163 | Oncofetal driver |
| KIAA0947 | 7.494404983 | 2.828388223 | 3.235005458 | 11.99699024 | Oncofetal driver |
| SEZ6L2   | 14.58424194 | 0.085170561 | 0.098584615 | 9.320105691 | Oncofetal driver |
| EGLN3    | 3.651404357 | 0.176280453 | 0.38017265  | 3.517818714 | Oncofetal driver |
| MDM1     | 4.88103477  | 1.050156167 | 0.925094988 | 3.409686497 | Oncofetal driver |
| SLC44A3  | 10.31400931 | 2.095727025 | 1.681284196 | 8.625484074 | Oncofetal driver |
| CUEDC1   | 2.310026147 | 0.878736616 | 1.08632725  | 2.712095327 | Oncofetal driver |
| PRMT5    | 9.3076655   | 3.12996286  | 3.600659959 | 6.827956175 | Oncofetal driver |
| DCDC2    | 10.21516602 | 1.491999067 | 3.143646075 | 43.36570399 | Oncofetal driver |
| RAP2A    | 17.1978922  | 3.902671034 | 5.359076683 | 27.03956593 | Oncofetal driver |
| ZNF682   | 3.369253314 | 1.498692841 | 1.823984247 | 3.550265891 | Oncofetal driver |
| MAP1B    | 20.29235697 | 2.183375408 | 3.025257089 | 6.43532027  | Oncofetal driver |
| WWTR1    | 10.36309752 | 4.163282063 | 4.380403815 | 13.91210126 | Oncofetal driver |
| TTC23    | 4.31210159  | 1.561516006 | 1.90589282  | 5.392523795 | Oncofetal driver |
| S100A10  | 508.1726044 | 20.68465029 | 32.68671884 | 144.1382873 | Oncofetal driver |
| LIMS1    | 14.0562244  | 3.826092453 | 4.642703382 | 8.898862744 | Oncofetal driver |
| NGFRAP1  | 39.49823934 | 15.58705143 | 15.73869146 | 43.2217791  | Oncofetal driver |

|           |             |             |             |             |                  |
|-----------|-------------|-------------|-------------|-------------|------------------|
| DNMT3A    | 4.82755305  | 1.244607233 | 1.546573828 | 6.019365653 | Oncofetal driver |
| TMEM50A   | 29.75841287 | 9.196613499 | 12.58380773 | 28.31952443 | Oncofetal driver |
| NANP      | 2.922565219 | 0.898658876 | 1.255792053 | 3.386698251 | Oncofetal driver |
| ZNF865    | 2.30308432  | 0.93059018  | 0.713002192 | 2.821290176 | Oncofetal driver |
| HSP90AB1  | 472.5838754 | 180.0702093 | 172.2075061 | 520.4538576 | Oncofetal driver |
| TEAD3     | 14.64227367 | 1.93338589  | 3.021482966 | 6.434771151 | Oncofetal driver |
| LCORL     | 2.485986128 | 0.971115048 | 1.112167293 | 3.495100765 | Oncofetal driver |
| PTAR1     | 17.5318394  | 4.940208771 | 6.288082271 | 17.3257875  | Oncofetal driver |
| ELF4      | 8.551718945 | 0.93986873  | 1.390306724 | 2.877202613 | Oncofetal driver |
| GPATCH8   | 13.57718982 | 5.777526363 | 5.67185711  | 21.40168664 | Oncofetal driver |
| C14orf129 | 7.097000688 | 1.3274438   | 2.241463675 | 3.770976109 | Oncofetal driver |
| ODF2      | 5.573357425 | 2.726183271 | 2.750738271 | 5.81843065  | Oncofetal driver |
| ZCCHC10   | 8.918448631 | 3.246147752 | 5.538632769 | 10.44156701 | Oncofetal driver |
| HYOU1     | 13.28287167 | 4.863082032 | 8.16167385  | 13.59278444 | Oncofetal driver |
| C22orf29  | 2.734028398 | 1.026080981 | 1.001165567 | 2.400939895 | Oncofetal driver |
| GPD2      | 4.712547221 | 1.185149938 | 1.813647336 | 3.895769035 | Oncofetal driver |
| TMEM98    | 22.24796303 | 2.508415765 | 1.346295125 | 7.353317442 | Oncofetal driver |
| ZNF92     | 5.890746748 | 2.022668502 | 1.796110818 | 6.734159027 | Oncofetal driver |
| ITGA2     | 11.05351282 | 0.35924027  | 0.507362683 | 3.340660277 | Oncofetal driver |
| UBE2O     | 3.600335294 | 1.572995035 | 1.607267496 | 5.273997104 | Oncofetal driver |
| KLHL23    | 3.912605194 | 2.104350285 | 1.80720991  | 11.30314588 | Oncofetal driver |
| DSP       | 163.9194318 | 21.50930332 | 33.00486644 | 96.972187   | Oncofetal driver |
| TCERG1    | 13.98563739 | 4.787450495 | 5.480110528 | 14.27374774 | Oncofetal driver |
| H2AFY     | 5.045080549 | 1.57366748  | 2.501853676 | 4.467385449 | Oncofetal driver |
| BMPR2     | 14.57212229 | 4.382108607 | 4.892959134 | 10.44896695 | Oncofetal driver |
| ZNF600    | 12.13904415 | 3.604274388 | 4.407123605 | 9.37844267  | Oncofetal driver |
| ANLN      | 3.865458727 | 0.065075429 | 0.365862207 | 8.902276975 | Oncofetal driver |
| SPTLC1    | 23.56459164 | 5.315770955 | 6.435726097 | 13.73760587 | Oncofetal driver |
| RCC2      | 6.693244171 | 2.150950704 | 2.824485732 | 9.739485326 | Oncofetal driver |
| NNAT      | 9.454429811 | 1.082074212 | 0.894640685 | 2.887626999 | Oncofetal driver |
| TTC9C     | 6.819756705 | 3.07296686  | 2.378662912 | 5.747416518 | Oncofetal driver |
| NEDD4L    | 28.53706086 | 2.699017398 | 3.707381829 | 6.744041365 | Oncofetal driver |
| HUWE1     | 19.19774147 | 7.544075029 | 7.476545108 | 22.48168262 | Oncofetal driver |
| ZNF445    | 4.789272177 | 1.802910577 | 2.000052603 | 5.834230683 | Oncofetal driver |
| SNX27     | 10.46106556 | 3.218156168 | 3.467672184 | 10.99411965 | Oncofetal driver |
| RPAP1     | 2.765160035 | 1.098822685 | 0.931039161 | 2.127605296 | Oncofetal driver |
| SOD3      | 12.13417183 | 2.914617903 | 1.921855472 | 9.339933791 | Oncofetal driver |
| TWF1      | 25.40392908 | 8.839777703 | 14.72107129 | 61.85501746 | Oncofetal driver |
| AGPAT1    | 16.8086145  | 3.328850283 | 4.6070669   | 9.107665757 | Oncofetal driver |
| SMAP1     | 10.04374535 | 2.313728538 | 2.572292814 | 5.445578925 | Oncofetal driver |
| ENO1      | 177.5479649 | 32.13579725 | 42.85084311 | 77.5553679  | Oncofetal driver |
| COX19     | 6.166582957 | 1.523350172 | 1.726819027 | 4.251290171 | Oncofetal driver |
| TLE3      | 2.970602049 | 0.736681855 | 0.751373546 | 2.660038724 | Oncofetal driver |
| UCK2      | 3.757865915 | 0.829750536 | 0.706032756 | 6.059423647 | Oncofetal driver |

|         |             |             |             |             |                  |
|---------|-------------|-------------|-------------|-------------|------------------|
| AQP1    | 40.28801388 | 4.104477289 | 3.711991831 | 34.43691412 | Oncofetal driver |
| DYNLRB1 | 30.70745167 | 14.16438941 | 15.00479142 | 30.98894162 | Oncofetal driver |
| WFS1    | 4.500732854 | 1.49654893  | 1.415123459 | 3.857208919 | Oncofetal driver |
| DDX52   | 7.224730461 | 2.332935166 | 3.407532778 | 6.973320146 | Oncofetal driver |
| GMFB    | 6.819145388 | 1.863705871 | 3.027620109 | 6.286062272 | Oncofetal driver |
| H2AFY2  | 4.912049802 | 1.623159563 | 3.100366217 | 5.268646025 | Oncofetal driver |
| PLXNC1  | 2.931458841 | 0.976766417 | 1.213829032 | 2.539143359 | Oncofetal driver |
| RPL36A  | 2.007756791 | 1.08016159  | 0.923695054 | 4.130817462 | Oncofetal driver |
| CDC7    | 2.044943243 | 0.554973567 | 1.174069858 | 4.905169909 | Oncofetal driver |
| PVRL2   | 38.731626   | 10.43389142 | 12.96731692 | 41.76334649 | Oncofetal driver |
| NIPA1   | 4.742389681 | 2.0117874   | 2.42178205  | 4.600976201 | Oncofetal driver |
| FEM1B   | 19.92505658 | 7.260933834 | 8.141943358 | 19.64629815 | Oncofetal driver |
| PTK2    | 12.8679983  | 3.735690837 | 4.061834877 | 8.821658727 | Oncofetal driver |
| WDR54   | 2.003632004 | 0.352786906 | 0.600420682 | 2.198361885 | Oncofetal driver |
| DOCK9   | 5.211171242 | 2.020032768 | 2.249513135 | 4.783636382 | Oncofetal driver |
| TFRC    | 35.38965403 | 2.482853454 | 4.4743869   | 15.90944623 | Oncofetal driver |
| CHEK2   | 2.125357737 | 0.571288808 | 1.121822582 | 4.917594801 | Oncofetal driver |
| GLTSCR1 | 2.774143862 | 0.710413779 | 0.67912046  | 3.310018068 | Oncofetal driver |
| INPP5F  | 49.20386058 | 0.835769756 | 1.29170259  | 2.214322332 | Oncofetal driver |
| WDR83   | 3.147793028 | 1.404741082 | 1.414378905 | 3.451026384 | Oncofetal driver |
| HSPH1   | 28.65075834 | 10.49660602 | 13.44676823 | 28.40800729 | Oncofetal driver |
| C2orf29 | 15.06209854 | 5.402797317 | 6.440706465 | 15.27524904 | Oncofetal driver |
| OCRL    | 12.74011484 | 4.9669809   | 4.827777748 | 14.65453654 | Oncofetal driver |
| CUL4B   | 19.71556615 | 8.167964227 | 9.278114826 | 21.88471147 | Oncofetal driver |
| INCENP  | 3.383354873 | 0.860845313 | 1.393270027 | 9.479146057 | Oncofetal driver |
| EPCAM   | 322.2361436 | 2.354218298 | 11.65784174 | 47.11229349 | Oncofetal driver |
| RAB22A  | 7.983006733 | 2.949525421 | 3.952394395 | 7.113663929 | Oncofetal driver |
| RFC4    | 4.192668696 | 1.573371033 | 1.699608342 | 9.87715798  | Oncofetal driver |
| SLC38A1 | 8.918371641 | 0.554304355 | 1.463083786 | 11.24041404 | Oncofetal driver |
| GOLGA5  | 42.15785039 | 17.34163253 | 22.45062107 | 42.45437476 | Oncofetal driver |
| PTK7    | 12.1540599  | 0.143755303 | 0.160359187 | 4.056421833 | Oncofetal driver |
| RRAS2   | 16.09823875 | 7.667518125 | 8.125136848 | 18.49614593 | Oncofetal driver |
| PDCL    | 8.415651766 | 1.596524157 | 2.268488862 | 8.339887035 | Oncofetal driver |
| RPL35   | 708.9569516 | 216.1476101 | 203.678658  | 475.8759955 | Oncofetal driver |
| FOXK1   | 2.950756832 | 1.123441617 | 1.097949445 | 2.924045115 | Oncofetal driver |
| SH3RF2  | 6.453483132 | 2.072790323 | 1.307282155 | 13.14271195 | Oncofetal driver |
| IGF2BP3 | 7.965935728 | 0.060484184 | 0.045339954 | 3.514873631 | Oncofetal driver |
| MEIS2   | 5.582998723 | 2.265993118 | 1.226378871 | 6.327600644 | Oncofetal driver |
| SORT1   | 15.67447148 | 3.612868645 | 2.506512219 | 9.205334514 | Oncofetal driver |
| PLCE1   | 13.64123544 | 0.37920816  | 0.185292677 | 5.007846791 | Oncofetal driver |
| CEP89   | 5.542376734 | 2.311665066 | 1.884191476 | 9.445411578 | Oncofetal driver |
| GPR37   | 4.25077502  | 1.792616683 | 1.692492757 | 7.828583009 | Oncofetal driver |
| CDCA4   | 2.5550321   | 0.37691876  | 0.414603478 | 2.902578743 | Oncofetal driver |
| ITPKC   | 7.326530326 | 1.186902444 | 1.92773074  | 3.902194502 | Oncofetal driver |

|      |             |             |             |             |                  |
|------|-------------|-------------|-------------|-------------|------------------|
| RPS9 | 65.91652332 | 32.04337349 | 27.49156526 | 62.81423117 | Oncofetal driver |
| MDK  | 43.12346488 | 1.167152994 | 2.365122137 | 46.18279654 | Oncofetal driver |
| MELK | 3.056564176 | 0.046646812 | 0.41211377  | 6.965872026 | Oncofetal driver |

Abbreviations: RPKM, Reads Per Kilobase per Million mapped reads.

**Supplementary Table 2. Summary of the different AS events regulated by ESRP2 in 97H and Huh7 cells**

| AS type | Total events |      | Shared events |
|---------|--------------|------|---------------|
|         | 97H          | Huh7 |               |
| SE      | 1640         | 1765 | 581           |
| A3SS    | 234          | 165  | 34            |
| A5SS    | 165          | 173  | 30            |
| MXE     | 338          | 277  | 55            |
| RI      | 219          | 186  | 36            |
| Sum     | 2596         | 2566 | 736           |

Abbreviations: AS: alternative splicing; SE: skipped exon; A3SS: alternative 3' splice site; A5SS: alternative 5' splice site; MXE: mutually exclusive exon; RI: retained intron; Sum: summary.

**Supplemental Table 3. ESRP2-affected SE events shared by 97H and Huh7 cell lines with FDR value less than 0.05**

| Gene    | Chromosome | Exon start    | Exon end      | IncLevel |        | FDR | IncLevel  |         | FDR             |
|---------|------------|---------------|---------------|----------|--------|-----|-----------|---------|-----------------|
|         |            |               |               | 97H_ESRP | 97H_Ve |     | Huh7_ESRP | Huh7_Ve |                 |
|         |            |               |               | 2        | c      |     | 2         | c       |                 |
| ACSL3   | 2          | 22290067<br>3 | 22290078<br>0 | 1        | 0.471  | 0   | 0.651     | 0.435   | 0.00106347<br>9 |
| ANAPC11 | 17         | 81893551      | 81893614      | 1        | 0.787  | 0   | 1         | 0.735   | 3.18E-12        |
| ARFGAP2 | 11         | 47172709      | 47172751      | 0.551    | 0.017  | 0   | 0.178     | 0       | 0.00393930<br>6 |

|          |    |          |          |       |       |            |       |       |            |
|----------|----|----------|----------|-------|-------|------------|-------|-------|------------|
| ARHGEF11 | 1  | 15693841 | 15693851 | 0.509 | 0.958 | 0          | 0     | 0.963 | 0          |
|          |    | 7        | 3        |       |       |            |       |       |            |
| BAIAP2   | 17 | 81110913 | 81110959 | 0.744 | 0.072 | 0          | 0.721 | 0     | 3.07E-05   |
| CD44     | 11 | 35211245 | 35211449 | 0.701 | 0.038 | 0          | 1     | 0.146 | 8.01E-10   |
| CEACAM1  | 19 | 42511575 | 42511628 | 0.251 | 0.977 | 0          | 0.033 | 0.579 | 0          |
| CTNND1   | 11 | 57791384 | 57791673 | 0.115 | 0.406 | 0          | 0.055 | 0.452 | 0          |
|          |    | 22550499 | 22550505 |       |       |            |       |       |            |
| ENAH     | 1  | 0        | 3        | 0.564 | 0.08  | 0          | 0.83  | 0.09  | 0          |
| EXOC7    | 17 | 76091142 | 76091235 | 0.239 | 1     | 0          | 0.02  | 0.589 | 0          |
|          |    | 21538081 | 21538108 |       |       |            |       |       | 0.00602980 |
| FN1      | 2  | 0        | 0        | 0.402 | 0.496 | 0          | 0.225 | 0     | 3          |
|          |    | 10471528 | 10471534 |       |       |            |       |       |            |
| INF2     | 14 | 3        | 0        | 0.961 | 0.399 | 0          | 0.985 | 0.353 | 0          |
| RAC1     | 7  | 6398661  | 6398718  | 0.143 | 0.013 | 0          | 0.245 | 0.001 | 0          |
|          |    | 10401081 | 10401090 |       |       |            |       |       |            |
| SLK      | 10 | 5        | 8        | 0.474 | 0.012 | 0          | 0.805 | 0.1   | 0          |
| USO1     | 4  | 75795335 | 75795356 | 0.642 | 0     | 0          | 0.983 | 0     | 0          |
|          |    | 14380755 | 14380761 |       |       |            |       |       |            |
| SCRIB    | 8  | 1        | 4        | 0.46  | 0.891 | 6.90E-12   | 0.19  | 0.973 | 0          |
| DGUOK    | 2  | 73957124 | 73957240 | 0.463 | 1     | 1.52E-10   | 0.613 | 1     | 2.15E-10   |
|          |    | 17889222 | 17889230 |       |       |            |       |       |            |
| RALGPS2  | 1  | 9        | 7        | 0.681 | 0.132 | 3.50E-10   | 0.909 | 0.211 | 2.73E-11   |
|          |    | 12859298 | 12859304 |       |       |            |       |       |            |
| SPTAN1   | 9  | 2        | 2        | 0.913 | 0.584 | 1.42E-09   | 0.96  | 0.331 | 0          |
|          |    | 18431576 | 18431585 |       |       |            |       |       |            |
| EIF4G1   | 3  | 2        | 6        | 0.098 | 1     | 3.48E-09   | 0.713 | 0.397 | 1.45E-13   |
| FGFR3    | 4  | 1803691  | 1803836  | 0.112 | 0.842 | 8.75E-09   | 0.695 | 0.597 | 8.67E-06   |
| MAP3K7   | 6  | 90544551 | 90544632 | 0.739 | 0.282 | 3.29E-08   | 0.827 | 0.313 | 7.42E-14   |
| NF2      | 22 | 29683019 | 29683064 | 0.96  | 0.381 | 5.24E-08   | 0.76  | 0.274 | 2.17E-07   |
|          |    | 10220951 | 10220956 |       |       |            |       |       | 0.00146047 |
| YAP1     | 11 | 6        | 4        | 1     | 0.474 | 3.73E-07   | 1     | 0.532 | 6          |
| EPN1     | 19 | 55677549 | 55677734 | 0.44  | 0.012 | 1.08E-05   | 0.596 | 0.273 | 1.28E-06   |
|          |    | 76729689 | 76729794 |       |       |            |       |       | 0.00180878 |
| METTL23  | 17 |          |          | 0.952 | 0.558 | 1.08E-05   | 0.742 | 0.26  | 5          |
|          |    | 29096154 | 29096604 |       |       |            |       |       | 0.03886320 |
| EPB41    | 1  |          |          | 0.531 | 0.09  | 1.49E-05   | 0.305 | 0.075 | 3          |
|          |    | 56390555 | 56390665 |       |       | 0.00011806 |       |       |            |
| AURKA    | 20 |          |          | 1     | 0.662 | 6          | 1     | 0.543 | 4.99E-08   |
|          |    | 93392916 | 93392955 |       |       | 0.00013186 |       |       |            |
| MYOF     | 10 |          |          | 0.758 | 0.963 | 6          | 0.312 | 0.966 | 4.45E-06   |
|          |    | 14451874 | 14451881 |       |       | 0.00020604 |       |       |            |
| LRRC14   | 8  | 8        | 5        | 1     | 0     | 1          | 1     | 0     | 0.03936474 |
|          |    | 15643906 | 15644051 |       |       | 0.00032386 |       |       |            |
| CYP4F3   | 19 |          |          | 0.673 | 0.126 | 5          | 0.944 | 0.101 | 2.26E-12   |

|                |    |               |               |       |       |                 |       |       |                 |
|----------------|----|---------------|---------------|-------|-------|-----------------|-------|-------|-----------------|
| ZDHHHC16       | 10 | 97453798      | 97453846      | 1     | 0.656 | 0.00045659<br>7 | 1     | 0.431 | 2.40E-05        |
| CLK4           | 5  | 17861734<br>3 | 17861743<br>4 | 1     | 0.157 | 0.00060488<br>5 | 1     | 0.383 | 0.00702029<br>3 |
| KIF23          | 15 | 69425281      | 69425323      | 0.447 | 0.186 | 0.00064369<br>2 | 0.647 | 0.2   | 7.43E-10        |
| SLMAP          | 3  | 57925844      | 57925934      | 0.547 | 0.846 | 0.00119757<br>2 | 0.139 | 1     | 6.09E-10        |
| METTL26        | 16 | 634888        | 635063        | 0.732 | 0.467 | 0.00157158<br>8 | 0.737 | 0.34  | 0.00532477<br>2 |
| MYO1B          | 2  | 19140263<br>1 | 19140271<br>8 | 0.214 | 0.525 | 0.00197878<br>9 | 0.045 | 0.486 | 0               |
| UAP1           | 1  | 16259273<br>1 | 16259278<br>2 | 0.687 | 0.251 | 0.00209585<br>2 | 0.871 | 0.054 | 0               |
| STAG3L1        | 7  | 75365951      | 75366059      | 1     | 0.646 | 0.00222522<br>2 | 1     | 0.225 | 0.00209888<br>7 |
| GNAS           | 20 | 58898940      | 58898985      | 0.389 | 0.547 | 0.00223901      | 0.403 | 0.813 | 2.01E-05        |
| AC135983.<br>2 | 15 | 32524470      | 32524600      | 0.925 | 0.348 | 0.00287922<br>4 | 0.923 | 0.438 | 0.02574777<br>6 |
| GOLIM4         | 3  | 16804078<br>5 | 16804086<br>9 | 0.669 | 0.886 | 0.00561566<br>4 | 0.403 | 0.813 | 2.01E-05        |
| UCHL1          | 4  | 41257114      | 41257126      | 0     | 0.946 | 0.00617540<br>7 | 0.969 | 0.639 | 0.00424439      |
| GALNT11        | 7  | 15202759<br>6 | 15202771<br>8 | 0     | 0.186 | 0.00775377<br>4 | 0.462 | 0.565 | 0.02361759<br>1 |
| SCAMP3         | 1  | 15526165<br>6 | 15526173<br>4 | 0.738 | 0.915 | 0.00816967<br>9 | 0.647 | 0.858 | 0.04661827<br>9 |
| ZNF664         | 12 | 12400342<br>2 | 12400354<br>0 | 1     | 0.482 | 0.01178525<br>1 | 1     | 0.041 | 0.00043097<br>9 |
| EEF1AKMT<br>3  | 12 | 57774628      | 57774767      | 1     | 0     | 0.01245918<br>3 | 0.094 | 1     | 0.03880915<br>4 |
| CCDC50         | 3  | 19137506<br>1 | 19137558<br>9 | 0.103 | 0.005 | 0.01285535<br>9 | 0.389 | 0.018 | 0               |
| ESYT2          | 7  | 15875278<br>0 | 15875284<br>3 | 0.482 | 0.314 | 0.01323215<br>5 | 0     | 1     | 1.37E-08        |
| STYXL1         | 7  | 76000889      | 76001002      | 1     | 0.8   | 0.02479023<br>9 | 0.617 | 1     | 2.42E-08        |

Abbreviations: SE, skipped exon; FDR, false discovery rate; IncLevel, exon inclusion level. Likelihood-ratio test was used for statistical analysis.

**Supplementary Table 4. List of ESRP2-regulated AS targets crucial for HCC progression.**

| AS targets | HR    | 95% CI          | P.value <sup>1</sup> | P.value <sup>2</sup><br>(log-rank test) | P.value (T. vs. N) <sup>3</sup><br>(Student's t test) |
|------------|-------|-----------------|----------------------|-----------------------------------------|-------------------------------------------------------|
| BAIAP2     | 0.39  | (0.18-0.86)     | 0.02                 | 0.006808707                             | 6.11E-17                                              |
| CCDC50     | 0.27  | (0.11-0.71)     | 0.0078               | 0.000567168                             | 1.05E-09                                              |
| CEACAM1    | 9.3   | (3-29)          | 0.00014              | 1.25E-05                                | 0.031818723                                           |
| CYP4F3     | 0.004 | (0.00043-0.037) | 0.0000011            | 1.09E-05                                | 9.94E-29                                              |
| EPN1       | 0.13  | (0.023-0.77)    | 0.024                | 0.000122828                             | 5.47E-08                                              |
| FN1        | 3.3   | (1.5-7.3)       | 0.0023               | 0.000220509                             | 4.80E-82                                              |
| MAP3K7     | 0.31  | (0.12-0.81)     | 0.016                | 0.001135039                             | 7.05E-06                                              |
| NF2        | 0.32  | (0.13-0.76)     | 0.01                 | 0.005561328                             | 3.25E-22                                              |
| RALGPS2    | 0.2   | (0.055-0.74)    | 0.016                | 0.031076459                             | 1.35E-10                                              |
| SCAMP3     | 0.012 | (0.00061-0.23)  | 0.0032               | 0.003541004                             | 2.75E-12                                              |
| SCRIB      | 0.22  | (0.073-0.69)    | 0.0093               | 0.002531667                             | 1.03E-14                                              |
| SPTAN1     | 0.27  | (0.08-0.95)     | 0.041                | 0.000682317                             | 3.20E-10                                              |
| UAP1       | 0.41  | (0.21-0.81)     | 0.01                 | 0.000191772                             | 4.35E-32                                              |
| USO1       | 0.41  | (0.21-0.82)     | 0.011                | 2.87E-05                                | 1.75E-61                                              |
| ZDHHC16    | 22    | (6.7-71)        | 3.30E-07             | 1.08E-06                                | 0.031961108                                           |

<sup>1</sup>, Cox's proportional hazards regression model was used to predict the significant prognostic factor for OS.

<sup>2</sup>, Kaplan-Meier survival analysis was performed and log-rank test was used for statistical analysis.

<sup>3</sup>, The PSI index of each AS target was analyzed in TCGA-HCC cohort. Student's t test was used to compare the PSI difference between tumor and non-tumor tissues.

Abbreviations: AS, alternative splicing; HR, hazard ratio; CI, confidence interval; PSI, percent spliced in.

**Supplementary Table 5. The predicted binding free energy results for TAB3-TAK1\_FL/ $\Delta$ E12**

**heterodimers. The energy of each complex was calculated by the PRODIGY web server.**

| Binding energy                                 | TAB3-TAK1_FL complex | TAB3-TAK1_ $\Delta$ E12 complex |
|------------------------------------------------|----------------------|---------------------------------|
| complex1_ $\Delta$ G (kcal mol <sup>-1</sup> ) | -11.1                | -10.3                           |
| complex2_ $\Delta$ G (kcal mol <sup>-1</sup> ) | -11                  | -16                             |
| complex3_ $\Delta$ G (kcal mol <sup>-1</sup> ) | -9.5                 | -12.1                           |
| Average_ $\Delta$ G (kcal mol <sup>-1</sup> )  | -10.5333             | -12.8                           |



**Supplementary Table 6. The log data from PRODIGY records the number of contact points among interacting residues and the spectrum of molecular forces.**

| Parameters                                           | TAB3-TAK1_FL.complex1 | TAB3-TAK1_ΔE12.complex2 |
|------------------------------------------------------|-----------------------|-------------------------|
| No. of intermolecular contacts                       | 63                    | 134                     |
| No. of charged-charged contacts                      | 9                     | 13                      |
| No. of charged-polar contacts                        | 5                     | 17                      |
| No. of charged-apolar contacts                       | 16                    | 35                      |
| No. of polar-polar contacts                          | 2                     | 11                      |
| No. of apolar-polar contacts                         | 15                    | 34                      |
| No. of apolar-apolar contacts                        | 16                    | 24                      |
| Percentage of apolar NIS residues                    | 39.4                  | 38.93                   |
| Percentage of charged NIS residues                   | 21.39                 | 21.37                   |
| Predicted binding affinity (kcal.mol <sup>-1</sup> ) | -11.1                 | -16                     |
| Predicted dissociation constant (M) at 25.0°C        | 7.30E-09              | 1.80E-12                |

**Supplementary Table 7. Sequences of primers used for qPCR, BGS, and RT-PCR**

|        | Primer      | Sequences (5'-3')         |
|--------|-------------|---------------------------|
| qPCR   | ESRP2_qF    | TTGCAGCAAGGCTGATGTG       |
|        | ESRP2_qR    | GTTGAGGCAGAGTGCTACACC     |
|        | 18S_qF      | CTCTTAGCTGAGTGTCCCGC      |
|        | 18S_qR      | CTGATCGTCTTCGAACCTCC      |
| BGS    | ESRP2_BGS_F | GGATAAGGTGTTGTAGTAGGTGAG  |
|        | ESRP2_BGS_R | ATAATCCCCCAAACCAAAC       |
| RT-PCR | TAK1_E12_F  | GAGGGCAAGAGGATGAGTGCTGACA |
|        | TAK1_E12_R  | CCTGACCAGGTTCTGTTCCAGTTAC |

Abbreviations: qPCR, quantitative real-time PCR; BGS, bisulfite genomic sequencing; RT-PCR, reverse-transcription PCR
